# Supplementary material for: Charge-Sensitive Optical Detection of Binding Kinetics between Phage-Displayed Peptide Ligands and Protein Targets
Source: MDPI journal article supplement (doi:10.3390/bios12060394), 2022-06-08
Supplement: s1 [file s1]

## Supporting Information

# Charge-Sensitive Optical Detection of Binding Kinetics between Phage-Displayed Peptide Ligands and Protein Targets

Runli Liang <sup>1,2</sup>, Yingnan Zhang <sup>3</sup>, Guangzhong Ma <sup>1</sup> and Shaopeng Wang <sup>1,4,\*</sup>

<sup>1</sup> Biodesign Center for Bioelectronics and Biosensors, Arizona State University, Tempe, AZ 85287, USA; [rliang3@asu.edu](mailto:rliang3@asu.edu) (R.L.); [guangzho@asu.edu](mailto:guangzho@asu.edu) (G.M.)

<sup>2</sup> School of Electrical, Computer and Energy Engineering, Arizona State University, Tempe, AZ 85287, USA

<sup>3</sup> Department of Early Discovery Biochemistry, Genentech, South San Francisco, CA 94080, USA;

[zhang.yingnan@gene.com](mailto:zhang.yingnan@gene.com)

<sup>4</sup> School of Biological and Health Systems Engineering, Arizona State University, Tempe, AZ 85287, USA

\* Correspondence: [shaopeng.wang@asu.edu](mailto:shaopeng.wang@asu.edu)

## S1. Noise spectrum of CSOD system

The noise of the CSOD system was analyzed by using a large-diameter fiber. The fiber was dipped into a PBS solution similar to the experimental conditions. No electric field was added. Images of fiber tip were collected at 2000 frames per second using a fast CMOS camera (Mikrotron EoSens 3CXP).

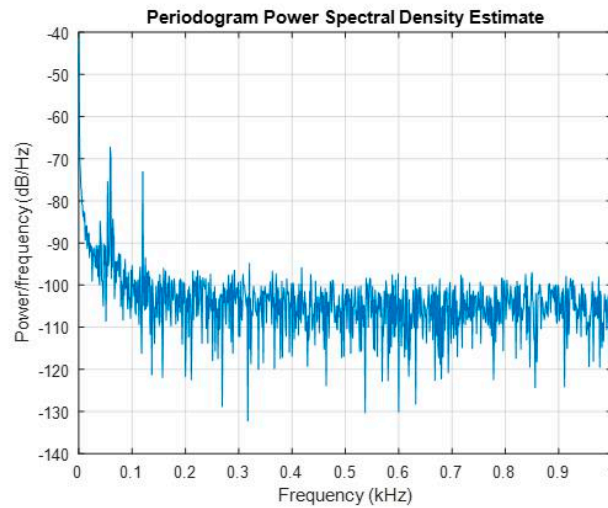

**Figure S1. CSOD system noise analysis.** Frequency analysis of a fiber tip imaged at 2000 frames per second without an electric field. Fiber diameter: 125  $\mu\text{m}$ ; length: 10 mm.

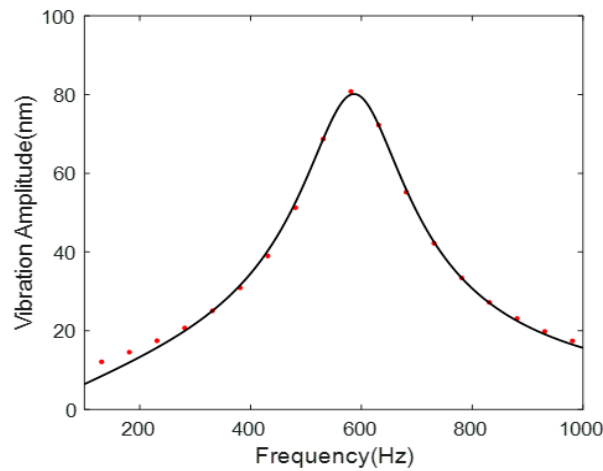

**Figure S2. Frequency dependency of the oscillation amplitude of a large diameter fiber.** The red dots are experimental data, and the solid line is calculated from Equation 1. Fiber diameter: 105.6  $\mu\text{m}$ ; length: 9.8  $\mu\text{m}$ . Buffer: 40 times diluted 1X PBS buffer.

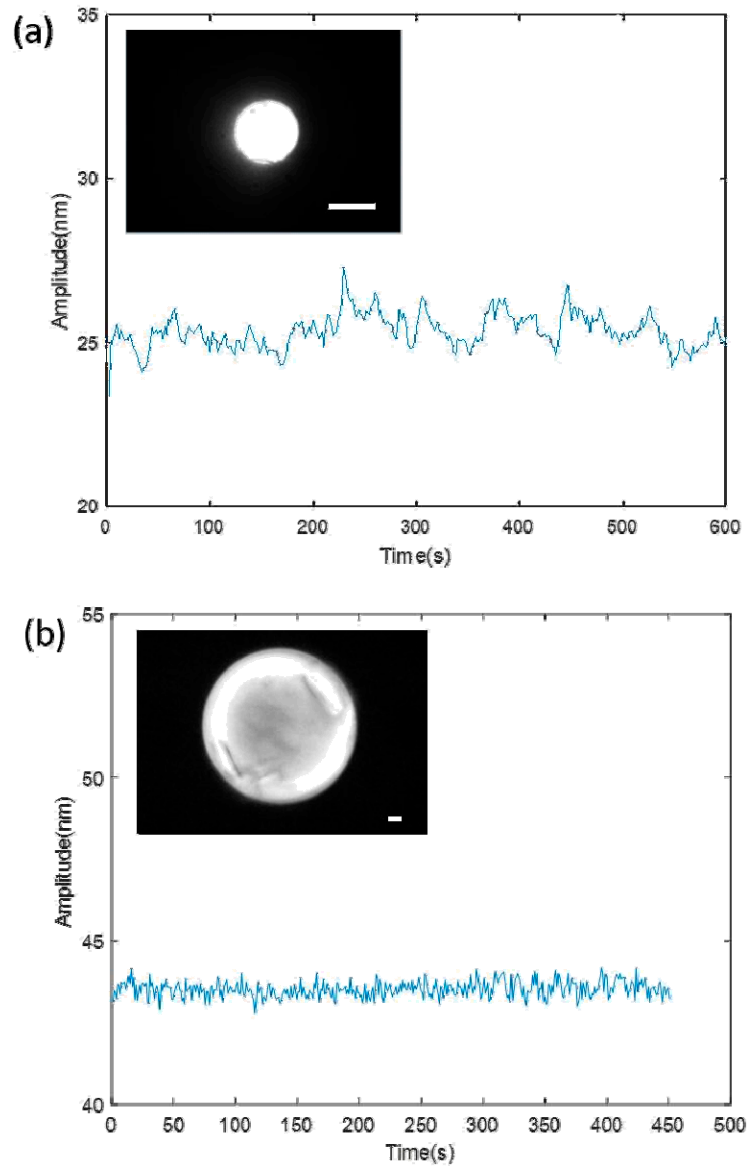

**Figure S3. Comparison of CSOD signal long-term stability for small and large diameter fibers.** (a) Small fiber with diameter 13.8  $\mu\text{m}$  and length 9.0 mm oscillates at 35 Hz and recorded at 100 fps, 2 second per FFT amplitude data point. Average signal: 24.96 nm; noise (standard deviation) = 0.51nm. (b) Large fiber with diameter 112.0  $\mu\text{m}$  and length 10.0 mm oscillates at 481 Hz, recorded at 2000 fps, 1 second per FFT amplitude data point. Average signal: 44.33 nm; noise (standard deviation) = 0.25 nm. The scale bar is 10  $\mu\text{m}$ .
