# Supplementary material for: Charge-Sensitive Optical Detection of Binding Kinetics between Phage-Displayed Peptide Ligands and Protein Targets
Source: Biosensors (Basel). 2022 Jun 8;12(6):394. doi: 10.3390/bios12060394 (PMC9221260; doi:10.3390/bios12060394)
Supplement: Supplementary file 1 [file biosensors-12-00394-s001.zip › Source Data.xlsx]

## Sheet: Fig2
Fig2b		Fig2c				Fig2d		Fig2e
Response	Time (ms)	Response	Position change (mm)	Fitted x	Fitted y	Response	Time (ms)	Frequency(Hz)	Amplitude(nm)
0.0625	0.000118405	-0.24975	-0.19734	-0.09023	-0.17575	0.0625	6.23183	0	3.92066e-12
0.125	-0.000321815	-0.1994	-0.19894	-0.09005	-0.1754	0.125	-16.9376	1	4.12999
0.1875	-0.000542486	-0.15025	-0.19149	-0.08987	-0.17505	0.1875	-28.5519	2	5.13317
0.25	0.000117562	-0.12487	-0.19122	-0.08969	-0.1747	0.25	6.18745	3	0.68792
0.3125	-0.000320841	-0.10957	-0.1875	-0.08951	-0.17435	0.3125	-16.8864	4	3.24236
0.375	-0.000103675	-0.0999	-0.18138	-0.08933	-0.17399	0.375	-5.45658	5	0.28448
0.4375	-0.000102558	-0.09023	-0.17234	-0.08915	-0.17364	0.4375	-5.3978	6	1.90422
0.5	-0.000322787	-0.07452	-0.14761	-0.08897	-0.17329	0.5	-16.9888	7	1.19718
0.5625	0.000117142	-0.06002	-0.11888	-0.08879	-0.17294	0.5625	6.16536	8	2.20068
0.625	0.000117142	-0.05035	-0.09707	-0.08861	-0.17259	0.625	6.16536	9	3.48833
0.6875	0.000556422	-0.04068	-0.07819	-0.08843	-0.17224	0.6875	29.2854	10	1.44309
0.75	0.000337213	-0.02497	-0.04867	-0.08825	-0.17189	0.75	17.7481	11	12.9754
0.8125	0.000117562	-0.01974	-0.0391	-0.08807	-0.17154	0.8125	6.18745	12	11.0415
0.875	0.000555387	-0.0149	-0.03032	-0.08789	-0.17118	0.875	29.2309	13	4.78462
0.9375	0.000997178	-0.01007	-0.01941	-0.08771	-0.17083	0.9375	52.483	14	1.63542
1	0.000555904	-0.00483	-0.00878	-0.08753	-0.17048	1	29.2581	15	3.11145
1.0625	0.000337681	0.00483	0.01037	-0.08735	-0.17013	1.0625	17.7727	16	3.73348
1.125	0.00122	0.01007	0.01729	-0.08717	-0.16978	1.125	63.9881	17	2.96062
1.1875	0.000557975	0.0149	0.03032	-0.08699	-0.16943	1.1875	29.3671	18	2.62311
1.25	0.000556938	0.02054	0.03856	-0.08681	-0.16908	1.25	29.3125	19	4.58964
1.3125	0.000117983	0.02457	0.04814	-0.08663	-0.16873	1.3125	6.20964	20	9.38654
1.375	0.000117562	0.03988	0.07686	-0.08645	-0.16837	1.375	6.18745	21	10.8811
1.4375	0.000778192	0.04955	0.09734	-0.08627	-0.16802	1.4375	40.9575	22	19.6348
1.5	0.000117983	0.05921	0.11835	-0.08609	-0.16767	1.5	6.20964	23	2.89467
1.5625	0.000117983	0.07492	0.14867	-0.08591	-0.16732	1.5625	6.20964	24	4.73324
1.625	-0.000322138	0.08983	0.17207	-0.08573	-0.16697	1.625	-16.9546	25	5.41403
1.6875	0.000337213	0.0999	0.18085	-0.08555	-0.16662	1.6875	17.7481	26	12.8892
1.75	-0.000540553	0.11037	0.18697	-0.08537	-0.16627	1.75	-28.4502	27	12.7293
1.8125	0.000117142	0.12528	0.18989	-0.08518	-0.16592	1.8125	6.16536	28	12.5506
1.875	-0.000102185	0.14985	0.19495	-0.085	-0.16556	1.875	-5.37817	29	56.1712
1.9375	-0.000322787	0.2002	0.19707	-0.08482	-0.16521	1.9375	-16.9888	30	65.9961
2	-0.000320516	0.24975	0.19787	-0.08464	-0.16486	2	-16.8693	31	13.133
2.0625	-0.000321165			-0.08446	-0.16451	2.0625	-16.9034	32	9.68977
2.125	-0.0012			-0.08428	-0.16416	2.125	-63.2056	33	18.0022
2.1875	-0.000102558			-0.0841	-0.16381	2.1875	-5.3978	34	15.3986
2.25	-0.0012			-0.08392	-0.16346	2.25	-63.247	35	16.6658
2.3125	-0.000541106			-0.08374	-0.16311	2.3125	-28.4793	36	14.3158
2.375	0.000118825			-0.08356	-0.16276	2.375	6.25395	37	54.4501
2.4375	0.000117983			-0.08338	-0.1624	2.4375	6.20964	38	33.8187
2.5	-0.000540277			-0.0832	-0.16205	2.5	-28.4356	39	97.2702
2.5625	-0.000102185			-0.08302	-0.1617	2.5625	-5.37817	40	103.95
2.625	0.000118405			-0.08284	-0.16135	2.625	6.23183	41	20.768
2.6875	0.000557456			-0.08266	-0.161	2.6875	29.3398	42	5.37685
2.75	0.000118405			-0.08248	-0.16065	2.75	6.23183	43	10.3395
2.8125	0.000557975			-0.0823	-0.1603	2.8125	29.3671	44	3.92393
2.875	0.000557975			-0.08212	-0.15995	2.875	29.3671	45	5.58966
2.9375	0.000557975			-0.08194	-0.15959	2.9375	29.3671	46	5.24965
3	0.00122			-0.08176	-0.15924	3	64.0927	47	11.9216
3.0625	0.000777058			-0.08158	-0.15889	3.0625	40.8978	48	13.6655
3.125	0.00033909			-0.0814	-0.15854	3.125	17.8468	49	8.65263
3.1875	0.000117983			-0.08122	-0.15819	3.1875	6.20964	50	24.0257
3.25	-0.000541935			-0.08104	-0.15784	3.25	-28.5229	51	21.422
3.3125	0.00033909			-0.08086	-0.15749	3.3125	17.8468	52	4.91672
3.375	0.000777625			-0.08068	-0.15714	3.375	40.9276	53	61.1115
3.4375	-0.00010144			-0.0805	-0.15678	3.4375	-5.33895	54	59.1222
3.5	0.000337681			-0.08032	-0.15643	3.5	17.7727	55	23.3344
3.5625	0.000117983			-0.08014	-0.15608	3.5625	6.20964	56	17.9044
3.625	0.000118825			-0.07996	-0.15573	3.625	6.25395	57	35.5587
3.6875	0.000118405			-0.07978	-0.15538	3.6875	6.23183	58	55.1159
3.75	-0.000761371			-0.0796	-0.15503	3.75	-40.0722	59	87.7106
3.8125	-0.000102558			-0.07942	-0.15468	3.8125	-5.3978	60	24.5283
3.875	-0.000541935			-0.07924	-0.15433	3.875	-28.5229	61	9.42013
3.9375	-0.00054221			-0.07906	-0.15397	3.9375	-28.5374	62	2.10514
4	-0.000541106			-0.07888	-0.15362	4	-28.4793	63	3.70117
4.0625	-0.000321165			-0.0787	-0.15327	4.0625	-16.9034	64	5.50762
4.125	-0.000102185			-0.07852	-0.15292	4.125	-5.37817	65	6.25296
4.1875	-0.000321165			-0.07834	-0.15257	4.1875	-16.9034	66	10.2733
4.25	-0.000321165			-0.07816	-0.15222	4.25	-16.9034	67	24.3944
4.3125	-0.000762509			-0.07798	-0.15187	4.3125	-40.132	68	7.84595
4.375	-0.00054221			-0.0778	-0.15152	4.375	-28.5374	69	13.7854
4.4375	-0.000541382			-0.07761	-0.15116	4.4375	-28.4938	70	24.7365
4.5	0.000557975			-0.07743	-0.15081	4.5	29.3671	71	15.6798
4.5625	0.000777058			-0.07725	-0.15046	4.5625	40.8978	72	7.50772
4.625	0.00122			-0.07707	-0.15011	4.625	64.0578	73	2.04428
4.6875	0.000118405			-0.07689	-0.14976	4.6875	6.23183	74	12.1539
4.75	0.000999638			-0.07671	-0.14941	4.75	52.6125	75	17.4667
4.8125	0.000997178			-0.07653	-0.14906	4.8125	52.483	76	32.1265
4.875	0.000996565			-0.07635	-0.14871	4.875	52.4508	77	24.4406
4.9375	0.00055953			-0.07617	-0.14836	4.9375	29.4489	78	31.207
5	0.000557975			-0.07599	-0.148	5	29.3671	79	7.73435
5.0625	0.00122			-0.07581	-0.14765	5.0625	64.0229	80	13.2741
5.125	0.000556938			-0.07563	-0.1473	5.125	29.3125	81	3.60264
5.1875	0.000557456			-0.07545	-0.14695	5.1875	29.3398	82	2.2191
5.25	0.000778757			-0.07527	-0.1466	5.25	40.9872	83	5.36779
5.3125	0.000557975			-0.07509	-0.14625	5.3125	29.3671	84	2.36137
5.375	0.000338622			-0.07491	-0.1459	5.375	17.8222	85	11.7329
5.4375	0.000996565			-0.07473	-0.14555	5.4375	52.4508	86	25.9
5.5	0.000777058			-0.07455	-0.14519	5.5	40.8978	87	6.87436
5.5625	0.000778757			-0.07437	-0.14484	5.5625	40.9872	88	18.5791
5.625	0.000117562			-0.07419	-0.14449	5.625	6.18745	89	10.7355
5.6875	0.000557456			-0.07401	-0.14414	5.6875	29.3398	90	9.6893
5.75	-0.000320191			-0.07383	-0.14379	5.75	-16.8521	91	3.17242
5.8125	-0.00010293			-0.07365	-0.14344	5.8125	-5.41735	92	4.04634
5.875	-0.000761599			-0.07347	-0.14309	5.875	-40.0841	93	1.87553
5.9375	-0.000541935			-0.07329	-0.14274	5.9375	-28.5229	94	1.26729
6	-0.000102558			-0.07311	-0.14238	6	-5.3978	95	6.03619
6.0625	0.000118825			-0.07293	-0.14203	6.0625	6.25395	96	3.65265
6.125	0.000117562			-0.07275	-0.14168	6.125	6.18745	97	3.02653
6.1875	-0.000541658			-0.07257	-0.14133	6.1875	-28.5083	98	1.77699
6.25	-0.000541382			-0.07239	-0.14098	6.25	-28.4938	99	2.98398
6.3125	-0.000103302			-0.07221	-0.14063	6.3125	-5.43697	100	3.06279
6.375	-0.000321165			-0.07203	-0.14028	6.375	-16.9034	101	3.15975
6.4375	-0.000101812			-0.07185	-0.13993	6.4375	-5.35852	102	3.56395
6.5	0.000118405			-0.07167	-0.13957	6.5	6.23183	103	2.50969
6.5625	0.000118825			-0.07149	-0.13922	6.5625	6.25395	104	2.12428
6.625	0.000338151			-0.07131	-0.13887	6.625	17.7974	105	1.06789
6.6875	0.000999022			-0.07113	-0.13852	6.6875	52.5801	106	1.75935
6.75	0.00122			-0.07095	-0.13817	6.75	64.0927	107	0.94347
6.8125	0.00122			-0.07077	-0.13782	6.8125	64.1975	108	1.99431
6.875	0.000338151			-0.07059	-0.13747	6.875	17.7974	109	3.43897
6.9375	0.000116721			-0.07041	-0.13712	6.9375	6.1432	110	2.11838
7	0.00144			-0.07022	-0.13676	7	75.6831	111	3.01876
7.0625	0.000999022			-0.07004	-0.13641	7.0625	52.5801	112	2.64932
7.125	0.00122			-0.06986	-0.13606	7.125	64.2323	113	2.42096
7.1875	0.000555904			-0.06968	-0.13571	7.1875	29.2581	114	3.27239
7.25	0.000779324			-0.0695	-0.13536	7.25	41.017	115	1.53514
7.3125	0.000777058			-0.06932	-0.13501	7.3125	40.8978	116	4.08432
7.375	0.000556938			-0.06914	-0.13466	7.375	29.3125	117	2.31008
7.4375	0.000118825			-0.06896	-0.13431	7.4375	6.25395	118	4.76363
7.5	-0.000102185			-0.06878	-0.13396	7.5	-5.37817	119	2.65451
7.5625	0.000557975			-0.0686	-0.1336	7.5625	29.3671	120	21.0343
7.625	-0.000321815			-0.06842	-0.13325	7.625	-16.9376	121	0.956
7.6875	-0.000101066			-0.06824	-0.1329	7.6875	-5.31929	122	2.62841
7.75	-0.000541935			-0.06806	-0.13255	7.75	-28.5229	123	1.33675
7.8125	-0.000760915			-0.06788	-0.1322	7.8125	-40.0482	124	0.57677
7.875	-0.000761827			-0.0677	-0.13185	7.875	-40.0961	125	2.4719
7.9375	-0.00010144			-0.06752	-0.1315	7.9375	-5.33895	126	1.91355
8	0.000118405			-0.06734	-0.13115	8	6.23183	127	0.6811
8.0625	-0.00032149			-0.06716	-0.13079	8.0625	-16.9205	128	2.14007
8.125	-0.00032149			-0.06698	-0.13044	8.125	-16.9205	129	1.9423
8.1875	-0.000761827			-0.0668	-0.13009	8.1875	-40.0961	130	2.49504
8.25	-0.000762281			-0.06662	-0.12974	8.25	-40.1201	131	1.05271
8.3125	-0.000541382			-0.06644	-0.12939	8.3125	-28.4938	132	1.4168
8.375	0.000777058			-0.06626	-0.12904	8.375	40.8978	133	1.17608
8.4375	0.000557975			-0.06608	-0.12869	8.4375	29.3671	134	1.67967
8.5	0.000118405			-0.0659	-0.12834	8.5	6.23183	135	2.09504
8.5625	0.000117983			-0.06572	-0.12798	8.5625	6.20964	136	0.6052
8.625	0.000338151			-0.06554	-0.12763	8.625	17.7974	137	0.90311
8.6875	0.000556422			-0.06536	-0.12728	8.6875	29.2854	138	0.83532
8.75	0.00122			-0.06518	-0.12693	8.75	64.0927	139	2.29302
8.8125	0.000118825			-0.065	-0.12658	8.8125	6.25395	140	1.60966
8.875	0.00144			-0.06482	-0.12623	8.875	75.6831	141	1.6287
8.9375	0.00122			-0.06464	-0.12588	8.9375	64.1275	142	0.90688
9	0.000118405			-0.06446	-0.12553	9	6.23183	143	1.46635
9.0625	0.000558491			-0.06428	-0.12517	9.0625	29.3943	144	1.26811
9.125	0.00033909			-0.0641	-0.12482	9.125	17.8468	145	0.68431
9.1875	0.000557975			-0.06392	-0.12447	9.1875	29.3671	146	0.86346
9.25	0.000778757			-0.06374	-0.12412	9.25	40.9872	147	2.68351
9.3125	0.000778192			-0.06356	-0.12377	9.3125	40.9575	148	0.96266
9.375	0.000118825			-0.06338	-0.12342	9.375	6.25395	149	1.25277
9.4375	0.000337213			-0.0632	-0.12307	9.4375	17.7481	150	0.59533
9.5	0.000119247			-0.06302	-0.12272	9.5	6.27617	151	1.16422
9.5625	-0.00010144			-0.06284	-0.12236	9.5625	-5.33895	152	1.28095
9.625	-0.000322463			-0.06265	-0.12201	9.625	-16.9717	153	0.76109
9.6875	0.000119669			-0.06247	-0.12166	9.6875	6.29839	154	1.76085
9.75	0.000118405			-0.06229	-0.12131	9.75	6.23183	155	0.61369
9.8125	-0.00054083			-0.06211	-0.12096	9.8125	-28.4647	156	0.85135
9.875	-0.000761599			-0.06193	-0.12061	9.875	-40.0841	157	2.24291
9.9375	-0.000762054			-0.06175	-0.12026	9.9375	-40.1081	158	0.56658
10	-0.000540277			-0.06157	-0.11991	10	-28.4356	159	2.17446
10.0625	-0.000321165			-0.06139	-0.11956	10.0625	-16.9034	160	1.62647
10.125	-0.000762054			-0.06121	-0.1192	10.125	-40.1081	161	1.62852
10.1875	0.00012009			-0.06103	-0.11885	10.1875	6.32054	162	0.50927
10.25	-0.000761599			-0.06085	-0.1185	10.25	-40.0841	163	0.65839
10.3125	0.000558491			-0.06067	-0.11815	10.3125	29.3943	164	0.35194
10.375	-0.000102185			-0.06049	-0.1178	10.375	-5.37817	165	1.38845
10.4375	0.000118405			-0.06031	-0.11745	10.4375	6.23183	166	1.16793
10.5	0.000557975			-0.06013	-0.1171	10.5	29.3671	167	0.97681
10.5625	0.000779892			-0.05995	-0.11675	10.5625	41.0469	168	0.62811
10.625	0.000560567			-0.05977	-0.11639	10.625	29.5035	169	2.29155
10.6875	0.00144			-0.05959	-0.11604	10.6875	75.7955	170	0.92196
10.75	0.000779324			-0.05941	-0.11569	10.75	41.017	171	1.21756
10.8125	0.00055901			-0.05923	-0.11534	10.8125	29.4216	172	0.85053
10.875	0.00122			-0.05905	-0.11499	10.875	64.0927	173	0.8677
10.9375	0.00122			-0.05887	-0.11464	10.9375	64.0927	174	1.14955
11	0.00122			-0.05869	-0.11429	11	64.1625	175	1.61558
11.0625	0.000557975			-0.05851	-0.11394	11.0625	29.3671	176	0.42426
11.125	0.000779892			-0.05833	-0.11358	11.125	41.0469	177	3.02748
11.1875	0.000778757			-0.05815	-0.11323	11.1875	40.9872	178	1.44186
11.25	0.000117983			-0.05797	-0.11288	11.25	6.20964	179	1.39483
11.3125	0.00033909			-0.05779	-0.11253	11.3125	17.8468	180	1.33546
11.375	0.00012009			-0.05761	-0.11218	11.375	6.32054	181	1.63205
11.4375	0.000117562			-0.05743	-0.11183	11.4375	6.18745	182	2.20815
11.5	0.000118405			-0.05725	-0.11148	11.5	6.23183	183	1.4977
11.5625	0.000338622			-0.05707	-0.11113	11.5625	17.8222	184	0.57739
11.625	-0.000320841			-0.05689	-0.11077	11.625	-16.8864	185	0.60997
11.6875	-0.000102558			-0.05671	-0.11042	11.6875	-5.3978	186	0.37381
11.75	-0.00054221			-0.05653	-0.11007	11.75	-28.5374	187	0.46385
11.8125	0.000117983			-0.05635	-0.10972	11.8125	6.20964	188	1.44915
11.875	-0.000980773			-0.05617	-0.10937	11.875	-51.6196	189	1.35846
11.9375	0.000118405			-0.05599	-0.10902	11.9375	6.23183	190	2.46323
12	0.000117562			-0.05581	-0.10867	12	6.18745	191	2.42024
12.0625	-0.00032149			-0.05563	-0.10832	12.0625	-16.9205	192	3.71056
12.125	-0.000541382			-0.05545	-0.10796	12.125	-28.4938	193	2.44419
12.1875	-0.000102185			-0.05526	-0.10761	12.1875	-5.37817	194	1.78756
12.25	0.000338151			-0.05508	-0.10726	12.25	17.7974	195	2.05281
12.3125	-0.000320841			-0.0549	-0.10691	12.3125	-16.8864	196	0.72389
12.375	-0.000321815			-0.05472	-0.10656	12.375	-16.9376	197	0.24774
12.4375	0.000338622			-0.05454	-0.10621	12.4375	17.8222	198	0.64134
12.5	0.000777058			-0.05436	-0.10586	12.5	40.8978	199	2.42259
12.5625	-0.000101812			-0.05418	-0.10551	12.5625	-5.35852	200	1.52136
12.625	0.000556938			-0.054	-0.10516	12.625	29.3125	201	0.9875
12.6875	0.000117562			-0.05382	-0.1048	12.6875	6.18745	202	1.15194
12.75	0.000557456			-0.05364	-0.10445	12.75	29.3398	203	2.03278
12.8125	0.000776494			-0.05346	-0.1041	12.8125	40.8681	204	1.48824
12.875	0.000558491			-0.05328	-0.10375	12.875	29.3943	205	1.69706
12.9375	-0.000541658			-0.0531	-0.1034	12.9375	-28.5083	206	1.53736
13	0.000997178			-0.05292	-0.10305	13	52.483	207	2.28601
13.0625	0.000118825			-0.05274	-0.1027	13.0625	6.25395	208	2.36414
13.125	0.000778192			-0.05256	-0.10235	13.125	40.9575	209	2.1145
13.1875	-0.000321165			-0.05238	-0.10199	13.1875	-16.9034	210	0.58278
13.25	0.000779324			-0.0522	-0.10164	13.25	41.017	211	2.32178
13.3125	0.000118825			-0.05202	-0.10129	13.3125	6.25395	212	0.8735
13.375	-0.000321815			-0.05184	-0.10094	13.375	-16.9376	213	2.10607
13.4375	0.000117562			-0.05166	-0.10059	13.4375	6.18745	214	0.42603
13.5	-0.000761599			-0.05148	-0.10024	13.5	-40.0841	215	0.39594
13.5625	-0.000541382			-0.0513	-0.09989	13.5625	-28.4938	216	1.62043
13.625	-0.000761827			-0.05112	-0.09954	13.625	-40.0961	217	2.31396
13.6875	-0.000761827			-0.05094	-0.09918	13.6875	-40.0961	218	0.59156
13.75	-0.000102558			-0.05076	-0.09883	13.75	-5.3978	219	1.42409
13.8125	-0.000761827			-0.05058	-0.09848	13.8125	-40.0961	220	1.09675
13.875	-0.000762054			-0.0504	-0.09813	13.875	-40.1081	221	1.40538
13.9375	-0.000542486			-0.05022	-0.09778	13.9375	-28.5519	222	1.30664
14	-0.000761599			-0.05004	-0.09743	14	-40.0841	223	0.77811
14.0625	-0.000541658			-0.04986	-0.09708	14.0625	-28.5083	224	2.58819
14.125	-0.000542486			-0.04968	-0.09673	14.125	-28.5519	225	0.91153
14.1875	-0.00054221			-0.0495	-0.09637	14.1875	-28.5374	226	1.65191
14.25	-0.000761371			-0.04932	-0.09602	14.25	-40.0722	227	1.49315
14.3125	-0.000541658			-0.04914	-0.09567	14.3125	-28.5083	228	0.76332
14.375	-0.00032149			-0.04896	-0.09532	14.375	-16.9205	229	0.7015
14.4375	-0.000541935			-0.04878	-0.09497	14.4375	-28.5229	230	1.5331
14.5	-0.00010144			-0.0486	-0.09462	14.5	-5.33895	231	2.02213
14.5625	0.000557975			-0.04842	-0.09427	14.5625	29.3671	232	1.69561
14.625	0.000339561			-0.04824	-0.09392	14.625	17.8716	233	0.83872
14.6875	0.000118405			-0.04806	-0.09356	14.6875	6.23183	234	1.80113
14.75	-0.000101812			-0.04788	-0.09321	14.75	-5.35852	235	2.33195
14.8125	0.000777058			-0.04769	-0.09286	14.8125	40.8978	236	0.62721
14.875	0.000117983			-0.04751	-0.09251	14.875	6.20964	237	1.18993
14.9375	0.000337681			-0.04733	-0.09216	14.9375	17.7727	238	0.91978
15	0.000118405			-0.04715	-0.09181	15	6.23183	239	1.43032
15.0625	-0.000761599			-0.04697	-0.09146	15.0625	-40.0841	240	2.66223
15.125	-0.000321165			-0.04679	-0.09111	15.125	-16.9034	241	0.15792
15.1875	-0.000102185			-0.04661	-0.09076	15.1875	-5.37817	242	1.62032
15.25	-0.00032149			-0.04643	-0.0904	15.25	-16.9205	243	2.25118
15.3125	-0.000322138			-0.04625	-0.09005	15.3125	-16.9546	244	2.4744
15.375	-0.000762054			-0.04607	-0.0897	15.375	-40.1081	245	3.20078
15.4375	-0.000541382			-0.04589	-0.08935	15.4375	-28.4938	246	1.6845
15.5	-0.000320191			-0.04571	-0.089	15.5	-16.8521	247	0.77606
15.5625	-0.000761143			-0.04553	-0.08865	15.5625	-40.0602	248	2.28608
15.625	-0.000761827			-0.04535	-0.0883	15.625	-40.0961	249	2.36337
15.6875	-0.000761827			-0.04517	-0.08795	15.6875	-40.0961	250	1.01909
15.75	-0.000102185			-0.04499	-0.08759	15.75	-5.37817	251	0.98599
15.8125	-0.0012			-0.04481	-0.08724	15.8125	-63.2125	252	1.84396
15.875	-0.0012			-0.04463	-0.08689	15.875	-63.2332	253	0.39511
15.9375	-0.00054221			-0.04445	-0.08654	15.9375	-28.5374	254	1.24825
16	-0.0012			-0.04427	-0.08619	16	-63.2607	255	0.80381
16.0625	-0.000760915			-0.04409	-0.08584	16.0625	-40.0482	256	1.19488
16.125	0.000117142			-0.04391	-0.08549	16.125	6.16536	257	0.64969
16.1875	-0.000541106			-0.04373	-0.08514	16.1875	-28.4793	258	2.15678
16.25	-0.000762054			-0.04355	-0.08478	16.25	-40.1081	259	0.59603
16.3125	-0.000321815			-0.04337	-0.08443	16.3125	-16.9376	260	1.98627
16.375	-0.000980593			-0.04319	-0.08408	16.375	-51.6101	261	2.03282
16.4375	-0.000980952			-0.04301	-0.08373	16.4375	-51.629	262	1.16782
16.5	0.000338622			-0.04283	-0.08338	16.5	17.8222	263	0.40683
16.5625	0.000117983			-0.04265	-0.08303	16.5625	6.20964	264	2.56745
16.625	-0.000762509			-0.04247	-0.08268	16.625	-40.132	265	2.21505
16.6875	0.000556422			-0.04229	-0.08233	16.6875	29.2854	266	0.61394
16.75	0.000337213			-0.04211	-0.08197	16.75	17.7481	267	0.43041
16.8125	-0.000102185			-0.04193	-0.08162	16.8125	-5.37817	268	0.69702
16.875	0.000557456			-0.04175	-0.08127	16.875	29.3398	269	2.59016
16.9375	-0.000103675			-0.04157	-0.08092	16.9375	-5.45658	270	1.6207
17	-0.000761827			-0.04139	-0.08057	17	-40.0961	271	2.36259
17.0625	0.000117142			-0.04121	-0.08022	17.0625	6.16536	272	1.61373
17.125	-0.000762054			-0.04103	-0.07987	17.125	-40.1081	273	0.46471
17.1875	-0.000761143			-0.04085	-0.07952	17.1875	-40.0602	274	1.98198
17.25	-0.000322138			-0.04067	-0.07916	17.25	-16.9546	275	1.9897
17.3125	-0.000762054			-0.04049	-0.07881	17.3125	-40.1081	276	2.43054
17.375	-0.00054221			-0.0403	-0.07846	17.375	-28.5374	277	1.00849
17.4375	-0.000761599			-0.04012	-0.07811	17.4375	-40.0841	278	1.56267
17.5	-0.00142			-0.03994	-0.07776	17.5	-74.7924	279	1.16599
				-0.03976	-0.07741			280	1.8316
				-0.03958	-0.07706			281	1.08684
				-0.0394	-0.07671			282	2.61556
				-0.03922	-0.07636			283	0.70181
				-0.03904	-0.076			284	2.67005
				-0.03886	-0.07565			285	2.26863
				-0.03868	-0.0753			286	1.44166
				-0.0385	-0.07495			287	0.72635
				-0.03832	-0.0746			288	2.03472
				-0.03814	-0.07425			289	1.74642
				-0.03796	-0.0739			290	0.3664
				-0.03778	-0.07355			291	1.16569
				-0.0376	-0.07319			292	1.37698
				-0.03742	-0.07284			293	1.81273
				-0.03724	-0.07249			294	1.06021
				-0.03706	-0.07214			295	1.29975
				-0.03688	-0.07179			296	0.91891
				-0.0367	-0.07144			297	1.46002
				-0.03652	-0.07109			298	0.80086
				-0.03634	-0.07074			299	0.26799
				-0.03616	-0.07038			300	1.18297
				-0.03598	-0.07003			301	1.36156
				-0.0358	-0.06968			302	1.28245
				-0.03562	-0.06933			303	0.74271
				-0.03544	-0.06898			304	1.38948
				-0.03526	-0.06863			305	1.38153
				-0.03508	-0.06828			306	0.14944
				-0.0349	-0.06793			307	1.90599
				-0.03472	-0.06757			308	0.84227
				-0.03454	-0.06722			309	1.28292
				-0.03436	-0.06687			310	1.45166
				-0.03418	-0.06652			311	0.5747
				-0.034	-0.06617			312	1.85667
				-0.03382	-0.06582			313	1.33793
				-0.03364	-0.06547			314	2.07667
				-0.03346	-0.06512			315	0.618
				-0.03328	-0.06476			316	1.77555
				-0.0331	-0.06441			317	0.41998
				-0.03292	-0.06406			318	0.90582
				-0.03273	-0.06371			319	2.84228
				-0.03255	-0.06336			320	1.86978
				-0.03237	-0.06301			321	0.46954
				-0.03219	-0.06266			322	0.80608
				-0.03201	-0.06231			323	0.35791
				-0.03183	-0.06196			324	1.02326
				-0.03165	-0.0616			325	1.02901
				-0.03147	-0.06125			326	1.14227
				-0.03129	-0.0609			327	2.9228
				-0.03111	-0.06055			328	1.89569
				-0.03093	-0.0602			329	1.99284
				-0.03075	-0.05985			330	1.6058
				-0.03057	-0.0595			331	0.77158
				-0.03039	-0.05915			332	0.5574
				-0.03021	-0.05879			333	0.41815
				-0.03003	-0.05844			334	1.39628
				-0.02985	-0.05809			335	0.53948
				-0.02967	-0.05774			336	2.79984
				-0.02949	-0.05739			337	0.84049
				-0.02931	-0.05704			338	1.7593
				-0.02913	-0.05669			339	0.97513
				-0.02895	-0.05634			340	1.77104
				-0.02877	-0.05598			341	0.15889
				-0.02859	-0.05563			342	1.59016
				-0.02841	-0.05528			343	1.8923
				-0.02823	-0.05493			344	0.16333
				-0.02805	-0.05458			345	0.748
				-0.02787	-0.05423			346	1.16997
				-0.02769	-0.05388			347	0.47317
				-0.02751	-0.05353			348	0.34295
				-0.02733	-0.05317			349	0.66031
				-0.02715	-0.05282			350	1.9356
				-0.02697	-0.05247			351	0.92557
				-0.02679	-0.05212			352	0.935
				-0.02661	-0.05177			353	1.29356
				-0.02643	-0.05142			354	0.85124
				-0.02625	-0.05107			355	0.88209
				-0.02607	-0.05072			356	1.08419
				-0.02589	-0.05036			357	0.81773
				-0.02571	-0.05001			358	0.45417
				-0.02553	-0.04966			359	2.22021
				-0.02534	-0.04931			360	2.36034
				-0.02516	-0.04896			361	2.42765
				-0.02498	-0.04861			362	0.95295
				-0.0248	-0.04826			363	0.85373
				-0.02462	-0.04791			364	1.42899
				-0.02444	-0.04755			365	0.9672
				-0.02426	-0.0472			366	1.635
				-0.02408	-0.04685			367	1.08439
				-0.0239	-0.0465			368	0.83051
				-0.02372	-0.04615			369	0.64263
				-0.02354	-0.0458			370	1.56695
				-0.02336	-0.04545			371	0.1748
				-0.02318	-0.0451			372	1.43707
				-0.023	-0.04475			373	1.63339
				-0.02282	-0.04439			374	1.88384
				-0.02264	-0.04404			375	1.03472
				-0.02246	-0.04369			376	1.04942
				-0.02228	-0.04334			377	0.8638
				-0.0221	-0.04299			378	1.27414
				-0.02192	-0.04264			379	1.87563
				-0.02174	-0.04229			380	1.17247
				-0.02156	-0.04194			381	1.11303
				-0.02138	-0.04158			382	0.52788
				-0.0212	-0.04123			383	1.25505
				-0.02102	-0.04088			384	0.42151
				-0.02084	-0.04053			385	1.53843
				-0.02066	-0.04018			386	0.7816
				-0.02048	-0.03983			387	0.68144
				-0.0203	-0.03948			388	1.79554
				-0.02012	-0.03913			389	2.322
				-0.01994	-0.03877			390	1.32323
				-0.01976	-0.03842			391	1.91177
				-0.01958	-0.03807			392	1.73606
				-0.0194	-0.03772			393	1.13579
				-0.01922	-0.03737			394	1.15331
				-0.01904	-0.03702			395	0.94156
				-0.01886	-0.03667			396	1.35006
				-0.01868	-0.03632			397	0.83324
				-0.0185	-0.03596			398	1.45498
				-0.01832	-0.03561			399	2.73294
				-0.01814	-0.03526			400	1.70536
				-0.01796	-0.03491			401	0.89108
				-0.01777	-0.03456			402	0.73323
				-0.01759	-0.03421			403	0.67526
				-0.01741	-0.03386			404	1.00068
				-0.01723	-0.03351			405	0.83098
				-0.01705	-0.03315			406	0.92896
				-0.01687	-0.0328			407	1.50778
				-0.01669	-0.03245			408	0.86515
				-0.01651	-0.0321			409	1.05154
				-0.01633	-0.03175			410	0.7241
				-0.01615	-0.0314			411	0.45471
				-0.01597	-0.03105			412	0.79661
				-0.01579	-0.0307			413	2.5175
				-0.01561	-0.03035			414	0.65069
				-0.01543	-0.02999			415	0.84015
				-0.01525	-0.02964			416	2.98725
				-0.01507	-0.02929			417	2.63585
				-0.01489	-0.02894			418	1.05296
				-0.01471	-0.02859			419	0.7793
				-0.01453	-0.02824			420	2.53024
				-0.01435	-0.02789			421	1.56356
				-0.01417	-0.02754			422	1.05837
				-0.01399	-0.02718			423	1.28137
				-0.01381	-0.02683			424	0.48301
				-0.01363	-0.02648			425	0.46465
				-0.01345	-0.02613			426	1.17737
				-0.01327	-0.02578			427	0.27552
				-0.01309	-0.02543			428	1.13439
				-0.01291	-0.02508			429	1.12987
				-0.01273	-0.02473			430	1.51512
				-0.01255	-0.02437			431	0.76819
				-0.01237	-0.02402			432	0.70621
				-0.01219	-0.02367			433	0.7307
				-0.01201	-0.02332			434	0.72458
				-0.01183	-0.02297			435	0.25898
				-0.01165	-0.02262			436	2.07609
				-0.01147	-0.02227			437	1.12624
				-0.01129	-0.02192			438	1.81548
				-0.01111	-0.02156			439	1.00231
				-0.01093	-0.02121			440	0.80006
				-0.01075	-0.02086			441	0.61338
				-0.01057	-0.02051			442	1.54451
				-0.01039	-0.02016			443	0.91806
				-0.0102	-0.01981			444	1.13587
				-0.01002	-0.01946			445	2.11571
				-0.00984	-0.01911			446	2.04951
				-0.00966	-0.01875			447	1.50187
				-0.00948	-0.0184			448	1.23784
				-0.0093	-0.01805			449	0.66522
				-0.00912	-0.0177			450	1.63248
				-0.00894	-0.01735			451	1.09031
				-0.00876	-0.017			452	1.8139
				-0.00858	-0.01665			453	2.18073
				-0.0084	-0.0163			454	1.53467
				-0.00822	-0.01595			455	1.79182
				-0.00804	-0.01559			456	2.76248
				-0.00786	-0.01524			457	1.89956
				-0.00768	-0.01489			458	1.12558
				-0.0075	-0.01454			459	1.14707
				-0.00732	-0.01419			460	0.78725
				-0.00714	-0.01384			461	1.30443
				-0.00696	-0.01349			462	0.61974
				-0.00678	-0.01314			463	0.74095
				-0.0066	-0.01278			464	0.27022
				-0.00642	-0.01243			465	0.9318
				-0.00624	-0.01208			466	0.90915
				-0.00606	-0.01173			467	0.49655
				-0.00588	-0.01138			468	1.59964
				-0.0057	-0.01103			469	1.25709
				-0.00552	-0.01068			470	0.65742
				-0.00534	-0.01033			471	1.59748
				-0.00516	-0.00997			472	2.95522
				-0.00498	-0.00962			473	1.10684
				-0.0048	-0.00927			474	0.9351
				-0.00462	-0.00892			475	1.36574
				-0.00444	-0.00857			476	0.52325
				-0.00426	-0.00822			477	0.59026
				-0.00408	-0.00787			478	1.02866
				-0.0039	-0.00752			479	0.52443
				-0.00372	-0.00716			480	1.73677
				-0.00354	-0.00681			481	1.9288
				-0.00336	-0.00646			482	0.44197
				-0.00318	-0.00611			483	0.85631
				-0.003	-0.00576			484	0.89195
				-0.00281	-0.00541			485	2.05434
				-0.00263	-0.00506			486	0.18887
				-0.00245	-0.00471			487	0.20858
				-0.00227	-0.00435			488	0.26986
				-0.00209	-0.004			489	1.05077
				-0.00191	-0.00365			490	1.46397
				-0.00173	-0.0033			491	1.89383
				-0.00155	-0.00295			492	0.88267
				-0.00137	-0.0026			493	0.31373
				-0.00119	-0.00225			494	1.44817
				-0.00101	-0.0019			495	1.91682
				-0.00083225	-0.00155			496	1.8647
				-0.00065201	-0.00119			497	1.27238
				-0.000471769	-0.000842743			498	0.44068
				-0.000291528	-0.000491523			499	0.76578
				-0.000111288	-0.000140303			500	1.28951
				6.8953e-05	0.000210917			501	0.28276
				0.000249194	0.000562137			502	0.83026
				0.000429434	0.000913357			503	1.11802
				0.000609675	0.00126			504	1.91002
				0.000789916	0.00162			505	0.21284
				0.000970156	0.00197			506	0.37737
				0.00115	0.00232			507	0.77652
				0.00133	0.00267			508	2.28474
				0.00151	0.00302			509	0.17893
				0.00169	0.00337			510	0.58434
				0.00187	0.00372			511	123.285
				0.00205	0.00407			512	1.12808
				0.00223	0.00443			513	1.26655
				0.00241	0.00478			514	0.63748
				0.00259	0.00513			515	0.94484
				0.00277	0.00548			516	1.07329
				0.00295	0.00583			517	0.53466
				0.00313	0.00618			518	0.94071
				0.00331	0.00653			519	0.76575
				0.00349	0.00688			520	1.36335
				0.00367	0.00724			521	1.45663
				0.00385	0.00759			522	0.84032
				0.00403	0.00794			523	1.35374
				0.00421	0.00829			524	1.05625
				0.00439	0.00864			525	1.33161
				0.00457	0.00899			526	0.73072
				0.00476	0.00934			527	1.7732
				0.00494	0.00969			528	1.02112
				0.00512	0.01005			529	1.38041
				0.0053	0.0104			530	1.53269
				0.00548	0.01075			531	0.55162
				0.00566	0.0111			532	0.90548
				0.00584	0.01145			533	0.76714
				0.00602	0.0118			534	0.2782
				0.0062	0.01215			535	0.73263
				0.00638	0.0125			536	1.9385
				0.00656	0.01285			537	2.60517
				0.00674	0.01321			538	0.72581
				0.00692	0.01356			539	0.18988
				0.0071	0.01391			540	0.91711
				0.00728	0.01426			541	2.20301
				0.00746	0.01461			542	0.26528
				0.00764	0.01496			543	0.5542
				0.00782	0.01531			544	1.51642
				0.008	0.01566			545	2.11418
				0.00818	0.01602			546	1.10839
				0.00836	0.01637			547	1.14669
				0.00854	0.01672			548	1.79249
				0.00872	0.01707			549	1.90995
				0.0089	0.01742			550	0.91388
				0.00908	0.01777			551	0.90218
				0.00926	0.01812			552	0.62018
				0.00944	0.01847			553	2.08237
				0.00962	0.01883			554	0.90828
				0.0098	0.01918			555	0.45182
				0.00998	0.01953			556	1.21362
				0.01016	0.01988			557	0.28725
				0.01034	0.02023			558	0.96065
				0.01052	0.02058			559	1.41356
				0.0107	0.02093			560	0.92503
				0.01088	0.02128			561	0.74949
				0.01106	0.02164			562	0.57807
				0.01124	0.02199			563	1.18122
				0.01142	0.02234			564	1.99093
				0.0116	0.02269			565	0.77628
				0.01178	0.02304			566	1.22692
				0.01196	0.02339			567	0.87129
				0.01215	0.02374			568	0.90092
				0.01233	0.02409			569	1.6165
				0.01251	0.02445			570	2.65231
				0.01269	0.0248			571	1.64518
				0.01287	0.02515			572	1.3692
				0.01305	0.0255			573	0.51257
				0.01323	0.02585			574	0.68698
				0.01341	0.0262			575	1.60643
				0.01359	0.02655			576	0.36185
				0.01377	0.0269			577	2.22824
				0.01395	0.02725			578	0.87602
				0.01413	0.02761			579	0.35766
				0.01431	0.02796			580	1.06298
				0.01449	0.02831			581	1.56333
				0.01467	0.02866			582	2.23656
				0.01485	0.02901			583	1.00177
				0.01503	0.02936			584	1.3938
				0.01521	0.02971			585	1.69658
				0.01539	0.03006			586	0.99811
				0.01557	0.03042			587	0.33647
				0.01575	0.03077			588	1.66115
				0.01593	0.03112			589	0.96739
				0.01611	0.03147			590	1.61885
				0.01629	0.03182			591	1.18159
				0.01647	0.03217			592	2.46387
				0.01665	0.03252			593	0.84885
				0.01683	0.03287			594	2.59922
				0.01701	0.03323			595	1.92045
				0.01719	0.03358			596	1.26052
				0.01737	0.03393			597	1.08336
				0.01755	0.03428			598	2.19901
				0.01773	0.03463			599	1.19195
				0.01791	0.03498			600	1.38996
				0.01809	0.03533			601	0.67274
				0.01827	0.03568			602	0.42406
				0.01845	0.03604			603	1.8445
				0.01863	0.03639			604	1.73968
				0.01881	0.03674			605	0.13624
				0.01899	0.03709			606	1.73896
				0.01917	0.03744			607	1.87041
				0.01935	0.03779			608	0.32573
				0.01953	0.03814			609	0.18043
				0.01972	0.03849			610	1.38745
				0.0199	0.03885			611	0.77295
				0.02008	0.0392			612	0.58595
				0.02026	0.03955			613	0.28474
				0.02044	0.0399			614	2.31344
				0.02062	0.04025			615	1.09048
				0.0208	0.0406			616	0.66254
				0.02098	0.04095			617	1.20362
				0.02116	0.0413			618	2.05725
				0.02134	0.04165			619	0.56614
				0.02152	0.04201			620	0.97574
				0.0217	0.04236			621	0.87622
				0.02188	0.04271			622	1.18219
				0.02206	0.04306			623	1.13968
				0.02224	0.04341			624	1.26612
				0.02242	0.04376			625	2.13958
				0.0226	0.04411			626	0.07981
				0.02278	0.04446			627	2.49193
				0.02296	0.04482			628	1.06648
				0.02314	0.04517			629	0.61813
				0.02332	0.04552			630	1.34468
				0.0235	0.04587			631	2.09747
				0.02368	0.04622			632	2.0464
				0.02386	0.04657			633	0.65292
				0.02404	0.04692			634	1.25433
				0.02422	0.04727			635	0.5949
				0.0244	0.04763			636	1.61978
				0.02458	0.04798			637	1.13803
				0.02476	0.04833			638	0.48406
				0.02494	0.04868			639	0.99483
				0.02512	0.04903			640	0.50405
				0.0253	0.04938			641	0.83174
				0.02548	0.04973			642	1.22158
				0.02566	0.05008			643	0.87061
				0.02584	0.05044			644	0.7893
				0.02602	0.05079			645	1.47519
				0.0262	0.05114			646	0.41026
				0.02638	0.05149			647	2.45751
				0.02656	0.05184			648	0.52196
				0.02674	0.05219			649	1.28976
				0.02692	0.05254			650	1.95399
				0.02711	0.05289			651	2.23455
				0.02729	0.05325			652	1.26492
				0.02747	0.0536			653	1.78536
				0.02765	0.05395			654	0.30486
				0.02783	0.0543			655	0.72005
				0.02801	0.05465			656	1.74783
				0.02819	0.055			657	1.05703
				0.02837	0.05535			658	3.08159
				0.02855	0.0557			659	1.50204
				0.02873	0.05605			660	0.62602
				0.02891	0.05641			661	0.21922
				0.02909	0.05676			662	1.60417
				0.02927	0.05711			663	0.25242
				0.02945	0.05746			664	1.66541
				0.02963	0.05781			665	0.93536
				0.02981	0.05816			666	1.00168
				0.02999	0.05851			667	1.04212
				0.03017	0.05886			668	0.938
				0.03035	0.05922			669	1.31974
				0.03053	0.05957			670	0.81442
				0.03071	0.05992			671	1.20418
				0.03089	0.06027			672	1.24975
				0.03107	0.06062			673	0.4384
				0.03125	0.06097			674	0.80327
				0.03143	0.06132			675	1.88325
				0.03161	0.06167			676	1.51795
				0.03179	0.06203			677	1.27969
				0.03197	0.06238			678	0.84239
				0.03215	0.06273			679	1.03349
				0.03233	0.06308			680	0.54085
				0.03251	0.06343			681	1.01099
				0.03269	0.06378			682	1.10371
				0.03287	0.06413			683	1.65342
				0.03305	0.06448			684	2.07253
				0.03323	0.06484			685	1.8106
				0.03341	0.06519			686	1.83675
				0.03359	0.06554			687	1.71768
				0.03377	0.06589			688	0.9226
				0.03395	0.06624			689	1.52107
				0.03413	0.06659			690	0.81028
				0.03431	0.06694			691	0.82093
				0.03449	0.06729			692	2.10129
				0.03468	0.06765			693	1.26249
				0.03486	0.068			694	0.54644
				0.03504	0.06835			695	0.61103
				0.03522	0.0687			696	0.37384
				0.0354	0.06905			697	1.19395
				0.03558	0.0694			698	1.94149
				0.03576	0.06975			699	1.91484
				0.03594	0.0701			700	1.66637
				0.03612	0.07045			701	0.15938
				0.0363	0.07081			702	0.77944
				0.03648	0.07116			703	1.56797
				0.03666	0.07151			704	0.90082
				0.03684	0.07186			705	1.17626
				0.03702	0.07221			706	0.29906
				0.0372	0.07256			707	1.53287
				0.03738	0.07291			708	0.4754
				0.03756	0.07326			709	1.38796
				0.03774	0.07362			710	1.64902
				0.03792	0.07397			711	0.95698
				0.0381	0.07432			712	1.55009
				0.03828	0.07467			713	0.55973
				0.03846	0.07502			714	0.5747
				0.03864	0.07537			715	1.84482
				0.03882	0.07572			716	0.34502
				0.039	0.07607			717	1.02895
				0.03918	0.07643			718	0.63323
				0.03936	0.07678			719	2.79851
				0.03954	0.07713			720	1.22309
				0.03972	0.07748			721	1.19507
				0.0399	0.07783			722	3.28861
				0.04008	0.07818			723	1.41474
				0.04026	0.07853			724	0.75058
				0.04044	0.07888			725	0.21796
				0.04062	0.07924			726	0.79222
				0.0408	0.07959			727	1.49868
				0.04098	0.07994			728	0.57259
				0.04116	0.08029			729	2.65955
				0.04134	0.08064			730	0.87368
				0.04152	0.08099			731	1.77326
				0.0417	0.08134			732	1.35359
				0.04188	0.08169			733	1.7289
				0.04207	0.08205			734	1.74407
				0.04225	0.0824			735	0.98011
				0.04243	0.08275			736	1.66257
				0.04261	0.0831			737	0.30941
				0.04279	0.08345			738	1.78843
				0.04297	0.0838			739	2.21755
				0.04315	0.08415			740	1.2368
				0.04333	0.0845			741	1.77926
				0.04351	0.08485			742	1.10077
				0.04369	0.08521			743	0.88643
				0.04387	0.08556			744	0.93469
				0.04405	0.08591			745	0.45706
				0.04423	0.08626			746	0.73234
				0.04441	0.08661			747	1.07521
				0.04459	0.08696			748	1.02012
				0.04477	0.08731			749	1.12355
				0.04495	0.08766			750	1.69545
				0.04513	0.08802			751	0.93431
				0.04531	0.08837			752	0.62054
				0.04549	0.08872			753	0.73844
				0.04567	0.08907			754	0.4935
				0.04585	0.08942			755	1.18868
				0.04603	0.08977			756	0.78843
				0.04621	0.09012			757	1.05078
				0.04639	0.09047			758	2.79977
				0.04657	0.09083			759	1.34531
				0.04675	0.09118			760	0.6704
				0.04693	0.09153			761	1.9739
				0.04711	0.09188			762	1.11316
				0.04729	0.09223			763	0.63931
				0.04747	0.09258			764	1.54733
				0.04765	0.09293			765	1.33217
				0.04783	0.09328			766	1.64848
				0.04801	0.09364			767	2.03397
				0.04819	0.09399			768	0.81935
				0.04837	0.09434			769	1.04464
				0.04855	0.09469			770	0.40473
				0.04873	0.09504			771	1.3482
				0.04891	0.09539			772	1.51865
				0.04909	0.09574			773	0.27559
				0.04927	0.09609			774	1.40609
				0.04945	0.09645			775	1.16232
				0.04964	0.0968			776	0.66922
				0.04982	0.09715			777	2.0841
				0.05	0.0975			778	0.27031
				0.05018	0.09785			779	1.41517
				0.05036	0.0982			780	0.21581
				0.05054	0.09855			781	0.50183
				0.05072	0.0989			782	1.65555
				0.0509	0.09925			783	1.57402
				0.05108	0.09961			784	1.35514
				0.05126	0.09996			785	0.8046
				0.05144	0.10031			786	0.68629
				0.05162	0.10066			787	0.73761
				0.0518	0.10101			788	0.60571
				0.05198	0.10136			789	0.30989
				0.05216	0.10171			790	0.97721
				0.05234	0.10206			791	1.37746
				0.05252	0.10242			792	1.11597
				0.0527	0.10277			793	1.27392
				0.05288	0.10312			794	1.50182
				0.05306	0.10347			795	1.19158
				0.05324	0.10382			796	1.29079
				0.05342	0.10417			797	0.72096
				0.0536	0.10452			798	1.51485
				0.05378	0.10487			799	0.16339
				0.05396	0.10523			800	1.35406
				0.05414	0.10558			801	1.04855
				0.05432	0.10593			802	1.65038
				0.0545	0.10628			803	1.6477
				0.05468	0.10663			804	1.18089
				0.05486	0.10698			805	1.70135
				0.05504	0.10733			806	0.82506
				0.05522	0.10768			807	0.51251
				0.0554	0.10804			808	0.66872
				0.05558	0.10839			809	0.90765
				0.05576	0.10874			810	0.67308
				0.05594	0.10909			811	0.88739
				0.05612	0.10944			812	0.72609
				0.0563	0.10979			813	1.74418
				0.05648	0.11014			814	0.77373
				0.05666	0.11049			815	1.28367
				0.05684	0.11085			816	0.73793
				0.05703	0.1112			817	0.3625
				0.05721	0.11155			818	1.83361
				0.05739	0.1119			819	0.80093
				0.05757	0.11225			820	1.45851
				0.05775	0.1126			821	0.40111
				0.05793	0.11295			822	1.16319
				0.05811	0.1133			823	2.60117
				0.05829	0.11365			824	1.39362
				0.05847	0.11401			825	1.61703
				0.05865	0.11436			826	1.83711
				0.05883	0.11471			827	1.12249
				0.05901	0.11506			828	1.21906
				0.05919	0.11541			829	0.38647
				0.05937	0.11576			830	1.98735
				0.05955	0.11611			831	1.06135
				0.05973	0.11646			832	0.46149
				0.05991	0.11682			833	0.69475
				0.06009	0.11717			834	1.79679
				0.06027	0.11752			835	0.84111
				0.06045	0.11787			836	0.39069
				0.06063	0.11822			837	0.96559
				0.06081	0.11857			838	1.89083
				0.06099	0.11892			839	0.63526
				0.06117	0.11927			840	0.08541
				0.06135	0.11963			841	0.18776
				0.06153	0.11998			842	0.90561
				0.06171	0.12033			843	1.32852
				0.06189	0.12068			844	0.10559
				0.06207	0.12103			845	1.36929
				0.06225	0.12138			846	0.967
				0.06243	0.12173			847	1.03248
				0.06261	0.12208			848	1.57923
				0.06279	0.12244			849	2.02902
				0.06297	0.12279			850	1.13861
				0.06315	0.12314			851	0.66578
				0.06333	0.12349			852	1.13514
				0.06351	0.12384			853	0.28128
				0.06369	0.12419			854	1.25897
				0.06387	0.12454			855	0.30877
				0.06405	0.12489			856	1.71196
				0.06423	0.12525			857	0.59806
				0.06441	0.1256			858	1.22473
				0.0646	0.12595			859	1.01634
				0.06478	0.1263			860	0.65171
				0.06496	0.12665			861	1.66104
				0.06514	0.127			862	1.46084
				0.06532	0.12735			863	1.23543
				0.0655	0.1277			864	0.72286
				0.06568	0.12805			865	0.85232
				0.06586	0.12841			866	1.05135
				0.06604	0.12876			867	1.66627
				0.06622	0.12911			868	0.99971
				0.0664	0.12946			869	1.55584
				0.06658	0.12981			870	1.1731
				0.06676	0.13016			871	1.6685
				0.06694	0.13051			872	1.85332
				0.06712	0.13086			873	0.38725
				0.0673	0.13122			874	1.03704
				0.06748	0.13157			875	0.25382
				0.06766	0.13192			876	1.16094
				0.06784	0.13227			877	0.96088
				0.06802	0.13262			878	0.90305
				0.0682	0.13297			879	0.81124
				0.06838	0.13332			880	0.65784
				0.06856	0.13367			881	1.05513
				0.06874	0.13403			882	0.66615
				0.06892	0.13438			883	0.90847
				0.0691	0.13473			884	1.41786
				0.06928	0.13508			885	0.75509
				0.06946	0.13543			886	0.54853
				0.06964	0.13578			887	1.30174
				0.06982	0.13613			888	0.98521
				0.07	0.13648			889	0.86044
				0.07018	0.13684			890	1.2905
				0.07036	0.13719			891	0.1312
				0.07054	0.13754			892	1.89819
				0.07072	0.13789			893	1.54654
				0.0709	0.13824			894	0.95874
				0.07108	0.13859			895	0.37339
				0.07126	0.13894			896	1.84017
				0.07144	0.13929			897	0.67322
				0.07162	0.13965			898	1.61967
				0.0718	0.14			899	2.18853
				0.07198	0.14035			900	0.92885
				0.07217	0.1407			901	1.0031
				0.07235	0.14105			902	1.28057
				0.07253	0.1414			903	0.95282
				0.07271	0.14175			904	0.44385
				0.07289	0.1421			905	2.50519
				0.07307	0.14245			906	0.49648
				0.07325	0.14281			907	1.26503
				0.07343	0.14316			908	1.85625
				0.07361	0.14351			909	1.65045
				0.07379	0.14386			910	1.08874
				0.07397	0.14421			911	1.61626
				0.07415	0.14456			912	0.88927
				0.07433	0.14491			913	0.78246
				0.07451	0.14526			914	0.91602
				0.07469	0.14562			915	1.07214
				0.07487	0.14597			916	0.36498
				0.07505	0.14632			917	0.54073
				0.07523	0.14667			918	1.40725
				0.07541	0.14702			919	1.731
				0.07559	0.14737			920	0.76237
				0.07577	0.14772			921	1.03604
				0.07595	0.14807			922	1.03639
				0.07613	0.14843			923	0.95533
				0.07631	0.14878			924	0.61167
				0.07649	0.14913			925	1.63187
				0.07667	0.14948			926	1.14993
				0.07685	0.14983			927	1.93991
				0.07703	0.15018			928	0.7807
				0.07721	0.15053			929	0.30325
				0.07739	0.15088			930	2.27324
				0.07757	0.15124			931	0.37447
				0.07775	0.15159			932	1.13271
				0.07793	0.15194			933	0.55751
				0.07811	0.15229			934	1.82391
				0.07829	0.15264			935	0.35647
				0.07847	0.15299			936	1.38963
				0.07865	0.15334			937	1.14751
				0.07883	0.15369			938	0.14003
				0.07901	0.15405			939	0.94603
				0.07919	0.1544			940	1.19299
				0.07937	0.15475			941	0.4851
				0.07956	0.1551			942	1.23172
				0.07974	0.15545			943	1.03168
				0.07992	0.1558			944	0.20567
				0.0801	0.15615			945	1.10008
				0.08028	0.1565			946	0.31751
				0.08046	0.15685			947	1.77253
				0.08064	0.15721			948	0.24027
				0.08082	0.15756			949	0.45831
				0.081	0.15791			950	1.25102
				0.08118	0.15826			951	1.70423
				0.08136	0.15861			952	2.05008
				0.08154	0.15896			953	2.49201
				0.08172	0.15931			954	1.34003
				0.0819	0.15966			955	1.3946
				0.08208	0.16002			956	0.62423
				0.08226	0.16037			957	1.29585
				0.08244	0.16072			958	2.14907
				0.08262	0.16107			959	0.72731
				0.0828	0.16142			960	2.64896
				0.08298	0.16177			961	0.62995
				0.08316	0.16212			962	0.63705
				0.08334	0.16247			963	1.10001
				0.08352	0.16283			964	2.80496
				0.0837	0.16318			965	0.51667
				0.08388	0.16353			966	0.63425
				0.08406	0.16388			967	0.84386
				0.08424	0.16423			968	0.51857
				0.08442	0.16458			969	0.66604
				0.0846	0.16493			970	0.52108
				0.08478	0.16528			971	0.16523
				0.08496	0.16564			972	0.39307
				0.08514	0.16599			973	1.96429
				0.08532	0.16634			974	1.71972
				0.0855	0.16669			975	0.13643
				0.08568	0.16704			976	0.87688
				0.08586	0.16739			977	1.17043
				0.08604	0.16774			978	1.11679
				0.08622	0.16809			979	0.13411
				0.0864	0.16845			980	1.47518
				0.08658	0.1688			981	1.69506
				0.08676	0.16915			982	0.55224
				0.08694	0.1695			983	0.66301
				0.08713	0.16985			984	0.76911
				0.08731	0.1702			985	0.60106
				0.08749	0.17055			986	0.28672
				0.08767	0.1709			987	0.69753
				0.08785	0.17126			988	1.05625
				0.08803	0.17161			989	1.10687
				0.08821	0.17196			990	0.31914
				0.08839	0.17231			991	1.41348
				0.08857	0.17266			992	0.95784
				0.08875	0.17301			993	0.1486
				0.08893	0.17336			994	0.93277
				0.08911	0.17371			995	0.67102
				0.08929	0.17406			996	0.77946
				0.08947	0.17442			997	1.30163
				0.08965	0.17477			998	1.42254
				0.08983	0.17512			999	0.95389
								1000	0.38292
								1001	1.2102
								1002	0.41399
								1003	1.02372
								1004	1.30626
								1005	1.91707
								1006	1.52896
								1007	0.93129
								1008	1.47556
								1009	1.26355
								1010	1.4443
								1011	0.79205
								1012	0.83243
								1013	1.04266
								1014	0.38148
								1015	1.3508
								1016	2.03298
								1017	0.84365
								1018	2.14041
								1019	1.11561
								1020	1.24628
								1021	1.44037
								1022	1.91975
								1023	1.59641
								1024	0.50093
								1025	1.64643
								1026	0.9735
								1027	1.72637
								1028	1.90627
								1029	1.41699
								1030	0.25373
								1031	1.18725
								1032	1.08926
								1033	1.88847
								1034	2.12645
								1035	0.43499
								1036	1.02607
								1037	1.364
								1038	0.31125
								1039	0.43093
								1040	2.44097
								1041	1.00232
								1042	0.81189
								1043	0.58732
								1044	0.24756
								1045	0.37608
								1046	0.51371
								1047	0.75135
								1048	0.80726
								1049	1.36853
								1050	2.41985
								1051	0.82461
								1052	1.1846
								1053	1.54137
								1054	1.21538
								1055	2.45541
								1056	2.14462
								1057	1.03159
								1058	0.76591
								1059	0.44746
								1060	1.26719
								1061	2.1678
								1062	0.93063
								1063	1.62028
								1064	0.98183
								1065	0.76772
								1066	0.54113
								1067	0.92478
								1068	0.48221
								1069	1.53212
								1070	1.29628
								1071	0.69642
								1072	2.54419
								1073	0.33623
								1074	2.02256
								1075	1.39064
								1076	0.78953
								1077	1.21699
								1078	0.47841
								1079	1.02574
								1080	1.38025
								1081	0.42665
								1082	0.79034
								1083	1.81014
								1084	1.42841
								1085	1.38869
								1086	1.92033
								1087	0.86128
								1088	1.81564
								1089	1.44357
								1090	2.24902
								1091	0.7179
								1092	1.30175
								1093	0.13396
								1094	1.26741
								1095	0.41274
								1096	0.94422
								1097	2.16462
								1098	0.59169
								1099	2.58806
								1100	1.61001
								1101	0.84865
								1102	0.39869
								1103	0.8619
								1104	1.82029
								1105	1.37448
								1106	0.33559
								1107	0.0729
								1108	0.24344
								1109	1.07175
								1110	0.8603
								1111	0.1283
								1112	0.69164
								1113	1.28796
								1114	0.82644
								1115	0.36581
								1116	0.60409
								1117	1.50343
								1118	0.57341
								1119	0.78618
								1120	0.31074
								1121	2.53596
								1122	2.24262
								1123	1.74402
								1124	0.80767
								1125	1.16707
								1126	0.7507
								1127	0.66146
								1128	1.45071
								1129	1.67473
								1130	0.50158
								1131	2.50814
								1132	0.25501
								1133	0.70573
								1134	2.30235
								1135	0.85122
								1136	1.0086
								1137	1.7628
								1138	2.79742
								1139	0.37702
								1140	0.96336
								1141	2.41046
								1142	1.47293
								1143	0.32629
								1144	1.19817
								1145	1.49229
								1146	0.99975
								1147	2.09173
								1148	2.20474
								1149	1.11482
								1150	0.55614
								1151	1.60694
								1152	0.61038
								1153	0.98444
								1154	0.95822
								1155	1.59028
								1156	1.81532
								1157	1.1075
								1158	1.37789
								1159	0.13035
								1160	0.30858
								1161	1.4891
								1162	1.67355
								1163	1.5987
								1164	1.76971
								1165	1.71044
								1166	1.18697
								1167	2.43739
								1168	0.59233
								1169	0.92536
								1170	1.61114
								1171	0.77394
								1172	1.4032
								1173	1.27266
								1174	1.03339
								1175	1.64588
								1176	1.01493
								1177	1.34852
								1178	1.55815
								1179	0.17049
								1180	0.92513
								1181	0.84871
								1182	0.86206
								1183	0.59011
								1184	0.1638
								1185	0.67114
								1186	0.39287
								1187	0.47871
								1188	1.76678
								1189	0.78414
								1190	0.45448
								1191	0.97919
								1192	1.54796
								1193	0.63159
								1194	0.29258
								1195	1.04433
								1196	1.01754
								1197	1.13763
								1198	0.97231
								1199	1.42181
								1200	1.57336
								1201	1.43228
								1202	1.95618
								1203	1.38788
								1204	0.53206
								1205	0.80708
								1206	0.73696
								1207	0.79862
								1208	0.88929
								1209	0.7348
								1210	0.6099
								1211	1.09904
								1212	0.69799
								1213	1.34965
								1214	1.4803
								1215	0.68398
								1216	0.87256
								1217	1.19496
								1218	2.14896
								1219	1.3871
								1220	0.85304
								1221	1.39116
								1222	1.01333
								1223	0.87021
								1224	1.64633
								1225	2.21587
								1226	0.9654
								1227	0.85956
								1228	2.21748
								1229	1.61344
								1230	0.80361
								1231	1.75685
								1232	1.09496
								1233	1.18659
								1234	0.41085
								1235	1.03576
								1236	1.80319
								1237	1.8121
								1238	1.71342
								1239	0.89149
								1240	0.58006
								1241	1.24472
								1242	0.44626
								1243	1.44861
								1244	1.89774
								1245	0.69096
								1246	0.60932
								1247	0.50091
								1248	1.24695
								1249	1.58253
								1250	1.45133
								1251	1.73174
								1252	0.92448
								1253	1.28036
								1254	2.5298
								1255	1.51114
								1256	0.87271
								1257	0.65277
								1258	1.48111
								1259	0.49402
								1260	1.47604
								1261	1.59236
								1262	0.39145
								1263	0.43531
								1264	1.53315
								1265	0.22104
								1266	1.74396
								1267	1.73638
								1268	1.10941
								1269	0.43448
								1270	0.23963
								1271	0.74487
								1272	0.94449
								1273	0.78047
								1274	1.2904
								1275	0.60135
								1276	1.25867
								1277	1.37058
								1278	1.2994
								1279	1.77097
								1280	1.9252
								1281	1.14961
								1282	0.66937
								1283	1.63233
								1284	1.37975
								1285	0.63219
								1286	0.70908
								1287	0.04291
								1288	1.39546
								1289	1.23085
								1290	1.71595
								1291	2.35048
								1292	0.12951
								1293	0.81738
								1294	1.4117
								1295	0.91447
								1296	2.10757
								1297	0.75971
								1298	1.22452
								1299	0.37507
								1300	0.75371
								1301	1.14169
								1302	1.04212
								1303	1.92353
								1304	1.63138
								1305	1.55217
								1306	2.27214
								1307	1.71895
								1308	0.6246
								1309	0.44752
								1310	1.55675
								1311	2.22504
								1312	0.34398
								1313	1.91359
								1314	0.95746
								1315	0.91927
								1316	0.88905
								1317	1.18224
								1318	0.43422
								1319	1.93912
								1320	1.57216
								1321	0.21212
								1322	1.33233
								1323	0.27018
								1324	0.77296
								1325	0.98555
								1326	0.97712
								1327	0.7284
								1328	1.91735
								1329	0.34593
								1330	0.07148
								1331	0.84188
								1332	0.99184
								1333	0.9974
								1334	1.54658
								1335	0.38594
								1336	0.75528
								1337	0.37182
								1338	0.52585
								1339	0.54862
								1340	0.87587
								1341	1.42479
								1342	1.21916
								1343	0.58342
								1344	0.9786
								1345	1.13795
								1346	0.67555
								1347	1.46243
								1348	0.81832
								1349	2.02567
								1350	2.50392
								1351	0.39247
								1352	1.38528
								1353	1.6106
								1354	1.47316
								1355	1.15205
								1356	0.45725
								1357	1.23905
								1358	1.43067
								1359	0.97723
								1360	0.79785
								1361	1.03436
								1362	1.10268
								1363	1.00553
								1364	1.80276
								1365	0.17166
								1366	1.43914
								1367	1.45449
								1368	1.06594
								1369	2.1747
								1370	0.82225
								1371	0.5533
								1372	0.49396
								1373	1.93447
								1374	0.19002
								1375	1.22564
								1376	1.36318
								1377	1.2704
								1378	1.78839
								1379	1.1068
								1380	0.9877
								1381	1.33758
								1382	1.43777
								1383	1.62465
								1384	0.58064
								1385	1.19354
								1386	0.32344
								1387	0.72116
								1388	1.43149
								1389	1.00312
								1390	1.58225
								1391	1.83595
								1392	0.93938
								1393	1.85158
								1394	1.46769
								1395	1.39168
								1396	1.13295
								1397	1.28996
								1398	1.60624
								1399	0.67892
								1400	2.15966
								1401	1.40541
								1402	1.13759
								1403	0.90186
								1404	0.86227
								1405	1.29095
								1406	1.56884
								1407	1.52634
								1408	1.06944
								1409	0.48116
								1410	1.95376
								1411	0.93824
								1412	2.16052
								1413	1.20092
								1414	2.08063
								1415	0.84409
								1416	0.50217
								1417	1.3083
								1418	1.71795
								1419	1.48525
								1420	1.28161
								1421	1.23537
								1422	0.39983
								1423	0.99573
								1424	0.41994
								1425	0.29471
								1426	0.51146
								1427	1.87332
								1428	1.4918
								1429	0.84625
								1430	0.61654
								1431	1.16445
								1432	1.55002
								1433	0.58002
								1434	0.71572
								1435	1.36534
								1436	1.91961
								1437	2.12586
								1438	2.08105
								1439	1.11535
								1440	0.8371
								1441	1.35355
								1442	0.87431
								1443	1.00264
								1444	2.62604
								1445	1.80522
								1446	1.25301
								1447	1.04474
								1448	0.49135
								1449	0.07541
								1450	1.79278
								1451	0.99177
								1452	0.58832
								1453	0.3583
								1454	0.84192
								1455	1.72452
								1456	1.37389
								1457	0.69117
								1458	0.9964
								1459	0.26749
								1460	0.32259
								1461	0.81431
								1462	1.49982
								1463	1.00811
								1464	0.90521
								1465	0.85518
								1466	1.23871
								1467	0.80187
								1468	0.58024
								1469	1.08259
								1470	0.1776
								1471	0.94651
								1472	1.4494
								1473	1.39483
								1474	1.88203
								1475	1.47699
								1476	0.72314
								1477	1.97262
								1478	1.27052
								1479	1.09052
								1480	2.02711
								1481	0.47204
								1482	1.18282
								1483	0.44749
								1484	0.5554
								1485	0.92436
								1486	1.31904
								1487	1.17109
								1488	0.54
								1489	2.33286
								1490	1.563
								1491	1.87827
								1492	2.34102
								1493	0.95502
								1494	1.46215
								1495	0.90108
								1496	1.80067
								1497	2.83526
								1498	2.07563
								1499	1.63246
								1500	1.42393
								1501	0.90487
								1502	0.7401
								1503	1.64154
								1504	2.13123
								1505	1.14504
								1506	0.5389
								1507	0.92512
								1508	0.48375
								1509	0.57908
								1510	0.80785
								1511	0.56632
								1512	0.48525
								1513	1.19074
								1514	0.50665
								1515	0.79256
								1516	0.87864
								1517	1.2527
								1518	1.06727
								1519	0.78686
								1520	1.01613
								1521	1.66914
								1522	2.40974
								1523	0.58345
								1524	0.72735
								1525	1.01546
								1526	0.3763
								1527	0.25638
								1528	0.4523
								1529	0.67736
								1530	0.90802
								1531	1.73997
								1532	1.07476
								1533	1.09602
								1534	1.10236
								1535	0.76247
								1536	0.25312
								1537	1.08879
								1538	0.54132
								1539	2.3178
								1540	1.49012
								1541	0.45084
								1542	1.72193
								1543	1.56677
								1544	1.55123
								1545	2.22832
								1546	0.55768
								1547	2.09775
								1548	0.81581
								1549	1.24386
								1550	0.64432
								1551	0.911
								1552	1.97207
								1553	1.09053
								1554	1.2773
								1555	1.30925
								1556	1.13472
								1557	1.1876
								1558	0.62701
								1559	2.36422
								1560	1.17619
								1561	0.9509
								1562	1.38276
								1563	0.60042
								1564	0.22568
								1565	1.11806
								1566	1.48552
								1567	0.95392
								1568	0.2861
								1569	0.71419
								1570	1.00095
								1571	2.16865
								1572	0.89922
								1573	0.49518
								1574	1.25821
								1575	0.28865
								1576	0.81386
								1577	1.53371
								1578	0.82963
								1579	1.46335
								1580	1.14788
								1581	0.41406
								1582	1.38334
								1583	1.36252
								1584	1.11764
								1585	1.39611
								1586	0.89926
								1587	0.50354
								1588	0.85697
								1589	0.79937
								1590	1.02764
								1591	1.67589
								1592	1.15402
								1593	0.96235
								1594	0.72885
								1595	0.66604
								1596	0.46811
								1597	0.94808
								1598	1.06241
								1599	0.67883
								1600	1.08255
								1601	1.45395
								1602	1.06102
								1603	0.61856
								1604	1.77329
								1605	1.26936
								1606	0.88397
								1607	2.0349
								1608	1.59982
								1609	1.10387
								1610	0.57203
								1611	0.97395
								1612	1.37982
								1613	1.85538
								1614	0.18848
								1615	1.39908
								1616	0.66315
								1617	1.80548
								1618	1.02874
								1619	1.91075
								1620	0.35254
								1621	1.64328
								1622	0.24488
								1623	1.04806
								1624	1.29791
								1625	0.38162
								1626	0.49693
								1627	1.40898
								1628	0.48431
								1629	1.38948
								1630	2.21378
								1631	0.27037
								1632	1.08969
								1633	1.37521
								1634	0.17971
								1635	0.43156
								1636	0.10928
								1637	0.92079
								1638	1.99617
								1639	0.86095
								1640	0.37553
								1641	1.40901
								1642	1.77726
								1643	0.90813
								1644	0.89743
								1645	1.06452
								1646	1.2933
								1647	0.91024
								1648	0.53294
								1649	0.51281
								1650	0.66891
								1651	0.97015
								1652	0.10154
								1653	1.03115
								1654	1.81227
								1655	0.84778
								1656	0.73944
								1657	0.3484
								1658	0.91806
								1659	0.19536
								1660	1.99604
								1661	0.71874
								1662	0.99844
								1663	1.45498
								1664	1.10732
								1665	0.53188
								1666	1.65835
								1667	2.61396
								1668	1.78703
								1669	0.42219
								1670	0.80787
								1671	0.59373
								1672	0.80029
								1673	0.93815
								1674	1.48081
								1675	1.45947
								1676	1.11087
								1677	1.38387
								1678	2.13398
								1679	2.03066
								1680	0.97661
								1681	2.47459
								1682	0.45154
								1683	0.60846
								1684	1.35702
								1685	0.11795
								1686	0.52372
								1687	1.31066
								1688	0.47155
								1689	1.08021
								1690	1.16008
								1691	1.84311
								1692	0.37099
								1693	0.73424
								1694	2.33762
								1695	1.2506
								1696	1.18698
								1697	1.49383
								1698	1.26415
								1699	0.93697
								1700	0.48615
								1701	1.61768
								1702	0.21929
								1703	2.19694
								1704	0.8233
								1705	1.99759
								1706	0.89199
								1707	2.25272
								1708	0.17453
								1709	3.12638
								1710	0.27684
								1711	1.19821
								1712	1.37755
								1713	1.69011
								1714	1.15117
								1715	0.21319
								1716	0.32321
								1717	0.4271
								1718	1.11461
								1719	1.28754
								1720	0.72441
								1721	1.95558
								1722	1.32131
								1723	1.04936
								1724	0.68867
								1725	1.23154
								1726	1.31747
								1727	0.58819
								1728	2.32654
								1729	2.63419
								1730	1.19241
								1731	0.62087
								1732	0.39479
								1733	1.23236
								1734	1.57094
								1735	0.69143
								1736	0.91505
								1737	1.91721
								1738	0.60322
								1739	1.06866
								1740	0.15126
								1741	0.66873
								1742	0.81132
								1743	0.30874
								1744	1.18473
								1745	0.83289
								1746	0.71003
								1747	1.29937
								1748	1.1981
								1749	1.3741
								1750	1.39298
								1751	0.70908
								1752	2.76354
								1753	1.18604
								1754	0.69765
								1755	2.17657
								1756	1.56133
								1757	0.63931
								1758	0.9364
								1759	1.29902
								1760	1.34364
								1761	0.55514
								1762	1.9119
								1763	0.6144
								1764	0.40658
								1765	1.46863
								1766	0.92127
								1767	1.01198
								1768	0.48927
								1769	0.58635
								1770	0.4276
								1771	1.04486
								1772	0.26161
								1773	0.30177
								1774	2.57395
								1775	0.81292
								1776	1.77538
								1777	1.84037
								1778	0.45898
								1779	0.85672
								1780	0.46976
								1781	1.58538
								1782	0.44694
								1783	1.46571
								1784	0.99014
								1785	1.14732
								1786	1.85588
								1787	1.53912
								1788	1.48408
								1789	1.60564
								1790	0.29731
								1791	1.38497
								1792	0.07903
								1793	1.0414
								1794	0.73549
								1795	1.08598
								1796	0.8565
								1797	1.70182
								1798	0.31597
								1799	1.0548
								1800	1.19103
								1801	0.73278
								1802	1.38572
								1803	0.96175
								1804	1.08228
								1805	1.99218
								1806	2.41841
								1807	1.14358
								1808	0.29713
								1809	0.6661
								1810	0.82948
								1811	1.82526
								1812	0.3623
								1813	1.02937
								1814	1.22141
								1815	0.60613
								1816	0.40575
								1817	1.13333
								1818	0.51301
								1819	0.79237
								1820	1.29905
								1821	0.86829
								1822	1.34545
								1823	1.72956
								1824	2.09801
								1825	0.62211
								1826	1.96854
								1827	0.87154
								1828	0.73471
								1829	0.95425
								1830	0.98617
								1831	0.64796
								1832	1.28919
								1833	1.4498
								1834	0.50761
								1835	1.62841
								1836	0.64045
								1837	0.81059
								1838	1.76886
								1839	0.63569
								1840	0.62964
								1841	0.58925
								1842	0.34458
								1843	0.94786
								1844	0.90989
								1845	0.75293
								1846	1.2044
								1847	0.54032
								1848	0.82884
								1849	0.65057
								1850	0.94951
								1851	1.01267
								1852	2.35067
								1853	1.50787
								1854	0.73971
								1855	1.79402
								1856	0.99142
								1857	2.226
								1858	1.83801
								1859	0.44564
								1860	0.71515
								1861	0.92865
								1862	1.01881
								1863	0.87159
								1864	0.8575
								1865	0.76326
								1866	0.85259
								1867	0.94467
								1868	1.75352
								1869	0.80561
								1870	1.68391
								1871	1.1046
								1872	1.32983
								1873	1.8836
								1874	1.27931
								1875	0.68464
								1876	1.24579
								1877	1.48661
								1878	1.3307
								1879	0.91694
								1880	0.81554
								1881	2.30821
								1882	0.57784
								1883	1.42429
								1884	1.00975
								1885	1.3192
								1886	0.1902
								1887	2.18565
								1888	1.50315
								1889	1.41755
								1890	0.68634
								1891	0.3745
								1892	0.5691
								1893	0.90029
								1894	1.70199
								1895	1.18127
								1896	0.07401
								1897	0.14595
								1898	1.57807
								1899	1.11916
								1900	0.98733
								1901	0.94731
								1902	0.40146
								1903	2.17894
								1904	1.08225
								1905	1.07553
								1906	2.29485
								1907	1.40552
								1908	1.57151
								1909	0.97445
								1910	0.16927
								1911	1.78333
								1912	1.18084
								1913	0.71952
								1914	1.14801
								1915	1.65491
								1916	0.61674
								1917	0.7181
								1918	1.2461
								1919	1.88413
								1920	0.45478
								1921	1.95354
								1922	0.79866
								1923	0.75687
								1924	0.4718
								1925	1.45106
								1926	0.23958
								1927	1.06032
								1928	0.74002
								1929	0.5534
								1930	0.54266
								1931	1.29016
								1932	1.37767
								1933	0.96954
								1934	0.987
								1935	0.84092
								1936	0.41961
								1937	1.44133
								1938	1.48837
								1939	0.22286
								1940	1.16844
								1941	0.74221
								1942	0.47239
								1943	0.9127
								1944	0.57592
								1945	1.52353
								1946	1.23092
								1947	0.93964
								1948	0.83893
								1949	0.82806
								1950	1.13961
								1951	2.53568
								1952	1.23391
								1953	1.54987
								1954	0.32004
								1955	2.54255
								1956	1.07632
								1957	0.33539
								1958	1.07225
								1959	0.538
								1960	1.59535
								1961	0.32683
								1962	0.89849
								1963	1.48548
								1964	0.38326
								1965	1.90437
								1966	0.8805
								1967	1.37987
								1968	0.84025
								1969	0.98711
								1970	0.79276
								1971	1.12712
								1972	1.25532
								1973	0.55519
								1974	1.81019
								1975	0.13568
								1976	1.2713
								1977	0.76711
								1978	0.3358
								1979	2.35814
								1980	1.84939
								1981	1.33804
								1982	0.83195
								1983	1.91999
								1984	0.93315
								1985	1.34627
								1986	0.75762
								1987	2.54007
								1988	0.53138
								1989	0.70764
								1990	1.29934
								1991	0.62339
								1992	0.82432
								1993	1.65869
								1994	2.06352
								1995	0.92611
								1996	1.23308
								1997	2.30228
[truncated: 14,002 more rows]

## Sheet: Fig3
Sample ID	2A										2B										4A										4B										5A
	Time(s)	Response(nm)	Fitting	Time(s)	Response(nm)	Fitting	Time(s)	Response(nm)	Fitting		Time(s)	Response(nm)	Fitting	Time(s)	Response(nm)	Fitting	Time(s)	Response(nm)	Fitting		Time(s)	Response(nm)	Fitting	Time(s)	Response(nm)	Fitting	Time(s)	Response(nm)	Fitting		Time(s)	Response(nm)	Fitting	Time(s)	Response(nm)	Fitting	Time(s)	Response(nm)	Fitting		Time(s)	Response(nm)	Fitting	Time(s)	Response(nm)	Fitting	Time(s)	Response(nm)	Fitting
	-199	0.17591	0	-179	0.7407	0	-179	1.76916	0		-169	0.60507	0	-179	0.75495	0	-179	1.15951	0		-89	0.2642	0	-89	0.87406	0	-79	0.67836	0		-189	-0.05307	0	-180	0.09469	0	-220	0.09757	0		-59	0.15846	0	-69	0.39122	0	-69	0.11294	0
	-198	-0.01149	0	-178	0.32414	0	-178	0.85565	0		-168	0.38905	0	-178	0.31056	0	-178	0.53628	0		-88	0.20273	0	-88	0.41896	0	-78	0.30084	0		-187.99	-0.02835	0	-179	0.01594	0	-219	0.12756	0		-58	-0.07044	0	-68	0.30369	0	-68	-0.57734	0
	-197	-0.10261	0	-177	0.06142	0	-177	0.1668	0		-167	0.2124	0	-177	0.00472	0	-177	0.10087	0		-87	0.14144	0	-87	0.05479	0	-77	0.01678	0		-186.98	-0.00574	0	-178	-0.05038	0	-218	0.18738	0		-57	-0.20562	0	-67	0.11586	0	-67	-0.8395	0
	-196	-0.0897	0	-176	-0.03348	0	-176	-0.2249	0		-166	0.09424	0	-176	-0.13369	0	-176	-0.08734	0		-86	0.09043	0	-86	-0.17539	0	-76	-0.13709	0		-185.97	0.00302	0	-177	-0.10883	0	-217	0.23131	0		-56	-0.20858	0	-66	-0.18716	0	-66	-0.6143	0
	-195	-0.00172	0	-175	-0.00673	0	-175	-0.34179	0		-165	0.02848	0	-175	-0.12838	0	-175	-0.05686	0		-85	0.05435	0	-85	-0.26524	0	-75	-0.16485	0		-184.96	-0.0077	0	-176	-0.15454	0	-216	0.2404	0		-55	-0.11448	0	-65	-0.47755	0	-65	-0.11095	0
	-194	0.10921	0	-174	0.06332	0	-174	-0.27882	0		-164	-0.01	0	-174	-0.04224	0	-174	0.09167	0		-84	0.03371	0	-84	-0.24257	0	-74	-0.10629	0		-183.95	-0.03389	0	-175	-0.17892	0	-215	0.21798	0		-54	-0.0024	0	-64	-0.58664	0	-64	0.35009	0
	-193	0.18891	0	-173	0.10549	0	-173	-0.15586	0		-163	-0.0511	0	-173	0.05076	0	-173	0.23275	0		-83	0.02696	0	-83	-0.1568	0	-73	-0.01877	0		-182.94	-0.06343	0	-174	-0.17961	0	-214	0.17541	0		-53	0.05266	0	-63	-0.45427	0	-63	0.55893	0
	-192	0.20153	0	-172	0.08695	0	-172	-0.06753	0		-162	-0.11345	0	-172	0.0958	0	-172	0.2723	0		-82	0.0314	0	-82	-0.06077	0	-72	0.04601	0		-181.93	-0.08193	0	-173	-0.16582	0	-213	0.12083	0		-52	0.01663	0	-62	-0.18945	0	-62	0.53056	0
	-191	0.14174	0	-171	0.02187	0	-171	-0.05246	0		-161	-0.1941	0	-171	0.07642	0	-171	0.18599	0		-81	0.04238	0	-81	0.00662	0	-71	0.06032	0		-180.919	-0.07999	0	-172	-0.15394	0	-212	0.05738	0		-51	-0.09311	0	-61	0.01407	0	-61	0.43328	0
	-190	0.03442	0	-170	-0.04471	0	-170	-0.09294	0		-160	-0.26884	0	-170	0.01501	0	-170	0.02224	0		-80	0.05206	0	-80	0.03106	0	-70	0.02665	0		-179.909	-0.05786	0	-171	-0.15554	0	-211	-0.01117	0		-50	-0.22204	0	-60	0.03394	0	-60	0.41004	0
	-189	-0.07694	0	-169	-0.06747	0	-169	-0.14041	0		-159	-0.30348	0	-169	-0.04433	0	-169	-0.12991	0		-79	0.05009	0	-79	0.02343	0	-69	-0.02965	0		-178.899	-0.02511	0	-170	-0.16666	0	-210	-0.07521	0		-49	-0.30719	0	-59	-0.08873	0	-59	0.45565	0
	-188	-0.14832	0	-168	-0.02893	0	-168	-0.15087	0		-158	-0.27134	0	-168	-0.06141	0	-168	-0.19012	0		-78	0.0272	0	-78	0.0105	0	-68	-0.07649	0		-177.889	0.00445	0	-169	-0.16704	0	-209	-0.1205	0		-48	-0.30737	0	-58	-0.1974	0	-58	0.45192	0
	-187	-0.15258	0	-167	0.04954	0	-167	-0.11151	0		-157	-0.16868	0	-167	-0.02142	0	-167	-0.12794	0		-77	-0.01915	0	-77	0.0202	0	-67	-0.09167	0		-176.879	0.0197	0	-168	-0.13207	0	-208	-0.13564	0		-47	-0.22208	0	-57	-0.16035	0	-57	0.31269	0
	-186	-0.08942	0	-166	0.11879	0	-166	-0.04623	0		-156	-0.02046	0	-166	0.05772	0	-166	0.0244	0		-76	-0.08042	0	-76	0.06755	0	-66	-0.07236	0		-175.869	0.0173	0	-167	-0.05078	0	-207	-0.12029	0		-46	-0.08996	0	-56	0.02127	0	-56	0.09056	0
	-185	0.01533	0	-165	0.1284	0	-165	-8.88617e-05	0		-155	0.12719	0	-165	0.13499	0	-165	0.19217	0		-75	-0.13721	0	-75	0.14739	0	-65	-0.03362	0		-174.859	0.00238	0	-166	0.06179	0	-206	-0.0878	0		-45	0.03352	0	-55	0.22542	0	-55	-0.06242	0
	-184	0.12042	0	-164	0.05425	0	-164	-0.01302	0		-154	0.2253	0	-164	0.1675	0	-164	0.2988	0		-74	-0.16593	0	-74	0.23692	0	-64	0.00173	0		-173.849	-0.01513	0	-165	0.16776	0	-205	-0.05998	0		-44	0.10612	0	-54	0.32034	0	-54	-0.0442	0
	-183	0.18545	0	-163	-0.0875	0	-163	-0.09765	0		-153	0.24314	0	-163	0.13237	0	-163	0.30457	0		-73	-0.14967	0	-73	0.30655	0	-63	0.01607	0		-172.839	-0.02606	0	-164	0.22531	0	-204	-0.05696	0		-43	0.11731	0	-53	0.27158	0	-53	0.08485	0
	-182	0.18607	0	-162	-0.24661	0	-162	-0.23225	0		-152	0.18218	0	-162	0.03853	0	-162	0.22322	0		-72	-0.08835	0	-72	0.33393	0	-62	0.0057	0		-171.829	-0.0263	0	-163	0.21336	0	-203	-0.088	0		-42	0.08364	0	-52	0.15582	0	-52	0.14421	0
	-181	0.12255	0	-161	-0.36185	0	-161	-0.37115	0		-151	0.07589	0	-161	-0.07709	0	-161	0.10921	0		-71	-0.00234	0	-71	0.31435	0	-61	-0.01876	0		-170.819	-0.0177	0	-162	0.14696	0	-202	-0.1477	0		-41	0.02793	0	-51	0.08107	0	-51	0.00204	0
	-180	0.01855	0	-160	-0.38884	0	-160	-0.46583	0		-150	-0.02531	0	-160	-0.16674	0	-160	0.02439	0		-70	0.07375	0	-70	0.26259	0	-60	-0.0396	0		-169.809	-0.00564	0	-161	0.07252	0	-201	-0.21839	0		-40	-0.03804	0	-50	0.09264	0	-50	-0.2842	0
	-179	-0.08885	0	-159	-0.31897	0	-159	-0.48535	0		-149	-0.07725	0	-159	-0.19388	0	-159	0.00329	0		-69	0.10548	0	-69	0.20514	0	-59	-0.04262	0		-168.799	0.00458	0	-160	0.0436	0	-200	-0.2766	0		-39	-0.11242	0	-49	0.14556	0	-49	-0.49502	0
	-178	-0.16354	0	-158	-0.18099	0	-158	-0.4268	0		-148	-0.0624	0	-158	-0.14924	0	-158	0.03623	0		-68	0.07515	0	-68	0.16686	0	-58	-0.0248	0		-167.789	0.01027	0	-159	0.08988	0	-199	-0.30035	0		-38	-0.18862	0	-48	0.15715	0	-48	-0.43334	0
	-177	-0.1836	0	-157	-0.02565	0	-157	-0.31249	0		-147	0.00262	0	-157	-0.05382	0	-157	0.0784	0		-67	-0.00767	0	-67	0.15861	0	-57	0.00453	0		-166.779	0.0115	0	-158	0.19706	0	-198	-0.27575	0		-37	-0.24646	0	-47	0.08352	0	-47	-0.10679	0
	-176	-0.14823	0	-156	0.09769	0	-156	-0.17772	0		-146	0.0763	0	-156	0.05228	0	-156	0.0786	0		-66	-0.10765	0	-66	0.17226	0	-56	0.02954	0		-165.768	0.00932	0	-157	0.31042	0	-197	-0.20212	0		-36	-0.26328	0	-46	-0.0473	0	-46	0.25938	0
	-175	-0.07624	0	-155	0.16063	0	-155	-0.05654	0		-145	0.11424	0	-155	0.12884	0	-155	0.01068	0		-65	-0.1778	0	-65	0.18574	0	-55	0.03697	0		-164.758	0.00404	0	-156	0.36159	0	-196	-0.09457	0		-35	-0.23679	0	-45	-0.16463	0	-45	0.39913	0
	-174	0.0026	0	-154	0.16277	0	-154	0.02774	0		-144	0.0926	0	-154	0.153	0	-154	-0.11028	0		-64	-0.18029	0	-64	0.17558	0	-54	0.02342	0		-163.748	-0.00499	0	-155	0.30495	0	-195	0.01757	0		-34	-0.19535	0	-44	-0.21	0	-44	0.22266	0
	-173	0.05953	0	-153	0.1246	0	-153	0.06489	0		-143	0.02121	0	-153	0.12711	0	-153	-0.23568	0		-63	-0.10457	0	-63	0.13044	0	-53	-0.00303	0		-162.738	-0.01778	0	-154	0.14393	0	-194	0.09844	0		-33	-0.17976	0	-43	-0.16839	0	-43	-0.11472	0
	-172	0.07707	0	-152	0.07205	0	-152	0.05503	0		-142	-0.06118	0	-152	0.07384	0	-152	-0.31002	0		-62	0.02618	0	-62	0.05856	0	-52	-0.02746	0		-161.728	-0.03174	0	-153	-0.0672	0	-193	0.11839	0		-32	-0.20775	0	-42	-0.05946	0	-42	-0.34916	0
	-171	0.05407	0	-151	0.02216	0	-151	0.00514	0		-141	-0.10744	0	-151	0.02229	0	-151	-0.30108	0		-61	0.16379	0	-61	-0.01524	0	-51	-0.03607	0		-160.718	-0.04127	0	-152	-0.24775	0	-192	0.067	0		-31	-0.25284	0	-41	0.08764	0	-41	-0.32672	0
	-170	0.00385	0	-150	-0.02258	0	-150	-0.07236	0		-140	-0.08831	0	-150	-0.00736	0	-150	-0.21651	0		-60	0.25554	0	-60	-0.06168	0	-50	-0.02316	0		-159.708	-0.03981	0	-151	-0.32857	0	-191	-0.04039	0		-30	-0.26078	0	-40	0.24531	0	-40	-0.11244	0
	-169	-0.05286	0	-149	-0.06945	0	-149	-0.1592	0		-139	-0.01041	0	-149	-0.01266	0	-149	-0.09783	0		-59	0.26699	0	-59	-0.06231	0	-49	0.00664	0		-158.698	-0.02372	0	-150	-0.28411	0	-190	-0.16773	0		-29	-0.19365	0	-39	0.38004	0	-39	0.09503	0
	-168	-0.09699	0	-148	-0.12438	0	-148	-0.23192	0		-138	0.08406	0	-148	-0.00717	0	-148	0.00393	0		-58	0.19669	0	-58	-0.01989	0	-48	0.04161	0		-157.688	0.00458	0	-149	-0.14253	0	-189	-0.27377	0		-28	-0.06475	0	-38	0.44823	0	-38	0.15001	0
	-167	-0.11845	0	-147	-0.18245	0	-147	-0.26642	0		-137	0.13707	0	-147	-0.00997	0	-147	0.05683	0		-57	0.07594	0	-57	0.04178	0	-47	0.0694	0		-156.678	0.03641	0	-148	0.03034	0	-188	-0.33052	0		-27	0.06695	0	-37	0.41436	0	-37	0.06977	0
	-166	-0.11901	0	-146	-0.22626	0	-146	-0.24665	0		-136	0.10473	0	-146	-0.03268	0	-146	0.06426	0		-56	-0.04599	0	-56	0.08911	0	-46	0.08286	0		-155.668	0.06037	0	-147	0.16365	0	-187	-0.33465	0		-26	0.13897	0	-36	0.2822	0	-36	-0.02526	0
	-165	-0.11003	0	-145	-0.23362	0	-145	-0.17341	0		-135	-0.01767	0	-145	-0.07144	0	-145	0.05961	0		-55	-0.12402	0	-55	0.09546	0	-45	0.08221	0		-154.658	0.06797	0	-146	0.21394	0	-186	-0.30548	0		-25	0.12786	0	-35	0.10788	0	-35	-0.06563	0
	-164	-0.10633	0	-144	-0.19035	0	-144	-0.06795	0		-134	-0.18894	0	-144	-0.10817	0	-144	0.08283	0		-54	-0.13616	0	-54	0.05501	0	-44	0.07264	0		-153.648	0.05826	0	-145	0.18123	0	-185	-0.27113	0		-24	0.05706	0	-34	-0.02663	0	-34	-0.11599	0
	-163	-0.119	0	-143	-0.10066	0	-143	0.03378	0		-133	-0.33829	0	-143	-0.12061	0	-143	0.15274	0		-53	-0.09074	0	-53	-0.01364	0	-43	0.05948	0		-152.638	0.03861	0	-144	0.10285	0	-184	-0.25165	0		-23	-0.03165	0	-33	-0.06614	0	-33	-0.29741	0
	-162	-0.14991	0	-142	0.01136	0	-142	0.09546	0		-132	-0.39756	0	-142	-0.09542	0	-142	0.25147	0		-52	-0.01915	0	-52	-0.07636	0	-42	0.0442	0		-151.628	0.02089	0	-143	0.03002	0	-183	-0.24929	0		-22	-0.11097	0	-32	-0.02072	0	-32	-0.62566	0
	-161	-0.19017	0	-141	0.11067	0	-141	0.09725	0		-131	-0.33403	0	-141	-0.03719	0	-141	0.33078	0		-51	0.04137	0	-51	-0.10064	0	-41	0.02392	0		-150.617	0.01512	0	-142	0.000687889	0	-182	-0.25103	0		-21	-0.17345	0	-31	0.04292	0	-31	-0.93625	0
	-160	-0.22299	0	-140	0.16688	0	-140	0.04657	0		-130	-0.16731	0	-140	0.03188	0	-140	0.33752	0		-50	0.06586	0	-50	-0.07251	0	-40	-0.00537	0		-149.607	0.02412	0	-141	0.02219	0	-181	-0.23999	0		-20	-0.21009	0	-30	0.05266	0	-30	-0.99247	0
	-159	-0.23009	0	-139	0.16828	0	-139	-0.02356	0		-129	0.03869	0	-139	0.08189	0	-139	0.24434	0		-49	0.05197	0	-49	-0.00447	0	-39	-0.04394	0		-148.597	0.04219	0	-140	0.07108	0	-180	-0.2072	0		-19	-0.19418	0	-29	-0.01426	0	-29	-0.69598	0
	-158	-0.19914	0	-138	0.12738	0	-138	-0.06917	0		-128	0.20509	0	-138	0.09002	0	-138	0.06852	0		-48	0.01779	0	-48	0.06987	0	-38	-0.08532	0		-147.587	0.05859	0	-139	0.10815	0	-179	-0.15556	0		-18	-0.09838	0	-28	-0.11564	0	-28	-0.20765	0
	-157	-0.12956	0	-137	0.07452	0	-137	-0.0564	0		-127	0.2747	0	-137	0.0525	0	-137	-0.13223	0		-47	-0.01056	0	-47	0.11183	0	-37	-0.11742	0		-146.577	0.06357	0	-138	0.09961	0	-178	-0.09489	0		-17	0.06526	0	-27	-0.17931	0	-27	0.1477	0
	-156	-0.03431	0	-136	0.0427	0	-136	0.02156	0		-126	0.23796	0	-136	-0.01245	0	-136	-0.28568	0		-46	-0.01459	0	-46	0.09663	0	-36	-0.12776	0		-145.567	0.05357	0	-137	0.03367	0	-177	-0.03338	0		-16	0.22581	0	-26	-0.16112	0	-26	0.12905	0
	-155	0.06337	0	-135	0.05098	0	-135	0.14042	0		-125	0.13537	0	-135	-0.07265	0	-135	-0.3396	0		-45	0.00612	0	-45	0.02554	0	-35	-0.11012	0		-144.557	0.03236	0	-136	-0.07492	0	-176	0.0268	0		-15	0.28801	0	-25	-0.08108	0	-25	-0.22657	0
	-154	0.13731	0	-134	0.09484	0	-134	0.25626	0		-124	0.03567	0	-134	-0.09738	0	-134	-0.28687	0		-44	0.03395	0	-44	-0.07484	0	-34	-0.0687	0		-143.547	0.00803	0	-135	-0.1929	0	-175	0.08637	0		-14	0.2044	0	-24	-0.01012	0	-24	-0.63103	0
	-153	0.16743	0	-133	0.14821	0	-133	0.32694	0		-123	0.00104	0	-133	-0.07263	0	-133	-0.168	0		-43	0.04334	0	-43	-0.16586	0	-33	-0.01712	0		-142.537	-0.01233	0	-134	-0.28403	0	-174	0.14182	0		-13	0.02463	0	-23	-0.01683	0	-23	-0.77268	0
	-152	0.14702	0	-132	0.1764	0	-132	0.33239	0		-122	0.05695	0	-132	-0.00859	0	-132	-0.04981	0		-42	0.01544	0	-42	-0.2159	0	-32	0.02767	0		-141.527	-0.02663	0	-133	-0.32418	0	-173	0.18178	0		-12	-0.12956	0	-22	-0.11318	0	-22	-0.55296	0
	-151	0.08544	0	-131	0.15347	0	-131	0.28322	0		-121	0.18177	0	-131	0.06446	0	-131	0.00849	0		-41	-0.05057	0	-41	-0.21552	0	-31	0.05359	0		-140.517	-0.03812	0	-132	-0.30949	0	-172	0.19226	0		-11	-0.1542	0	-21	-0.23976	0	-21	-0.13878	0
	-150	0.00475	0	-130	0.0757	0	-130	0.21343	0		-120	0.32035	0	-130	0.11021	0	-130	-0.01585	0		-40	-0.13536	0	-40	-0.18104	0	-30	0.05917	0		-139.507	-0.05207	0	-131	-0.25509	0	-171	0.16807	0		-10	-0.04689	0	-20	-0.30378	0	-20	0.19796	0
	-149	-0.06831	0	-129	-0.03552	0	-129	0.1611	0		-119	0.41392	0	-129	0.10368	0	-129	-0.09995	0		-39	-0.20767	0	-39	-0.14484	0	-29	0.05367	0		-138.497	-0.07121	0	-130	-0.18634	0	-170	0.12175	0		-9	0.08903	0	-19	-0.2454	0	-19	0.30127	0
	-148	-0.11211	0	-128	-0.14271	0	-128	0.14801	0		-118	0.42983	0	-128	0.04351	0	-128	-0.18989	0		-38	-0.23867	0	-38	-0.13755	0	-28	0.05115	0		-137.487	-0.09298	0	-129	-0.1274	0	-169	0.08107	0		-8	0.12886	0	-18	-0.08476	0	-18	0.2227	0
	-147	-0.11744	0	-127	-0.20886	0	-127	0.16917	0		-117	0.37583	0	-127	-0.04684	0	-127	-0.23052	0		-37	-0.21549	0	-37	-0.17144	0	-27	0.0617	0		-136.477	-0.11043	0	-128	-0.0923	0	-168	0.07384	0		-7	0.03071	0	-17	0.08714	0	-17	0.12503	0
	-146	-0.08953	0	-126	-0.21381	0	-126	0.19797	0		-116	0.29193	0	-126	-0.12957	0	-126	-0.19446	0		-36	-0.14722	0	-36	-0.23365	0	-26	0.08457	0		-135.466	-0.11623	0	-127	-0.08171	0	-167	0.10909	0		-6	-0.12985	0	-16	0.17194	0	-16	0.11045	0
	-145	-0.04399	0	-125	-0.16264	0	-125	0.20387	0		-115	0.22539	0	-125	-0.16995	0	-125	-0.09527	0		-35	-0.0606	0	-35	-0.29277	0	-25	0.1074	0		-134.456	-0.10715	0	-126	-0.08563	0	-166	0.16793	0		-5	-0.22527	0	-15	0.13673	0	-15	0.14037	0
	-144	0.00131	0	-124	-0.08246	0	-124	0.17222	0		-114	0.20324	0	-124	-0.15218	0	-124	0.0213	0		-34	0.01234	0	-34	-0.31539	0	-24	0.11241	0		-133.446	-0.08623	0	-125	-0.08973	0	-165	0.2129	0		-4	-0.18486	0	-14	0.03886	0	-14	0.11142	0
	-143	0.03425	0	-123	-0.00936	0	-123	0.11466	0		-113	0.21771	0	-123	-0.08625	0	-123	0.10219	0		-33	0.04889	0	-33	-0.28402	0	-23	0.08647	0		-132.436	-0.06115	0	-124	-0.08207	0	-164	0.21175	0		-3	-0.05172	0	-13	-0.02173	0	-13	-0.00331	0
	-142	0.05272	0	-122	0.0281	0	-122	0.06363	0		-112	0.23256	0	-122	-0.00267	0	-122	0.11431	0		-32	0.04567	0	-32	-0.20708	0	-22	0.02988	0		-131.426	-0.04016	0	-123	-0.05733	0	-163	0.16054	0		-2	0.06109	0	-12	0.0108	0	-12	-0.09733	0
	-141	0.06315	0	-121	0.02108	0	-121	0.05345	0		-111	0.20632	0	-121	0.06257	0	-121	0.05971	0		-31	0.01965	0	-31	-0.11572	0	-21	-0.04133	0		-130.416	-0.02794	0	-122	-0.01747	0	-162	0.0895	0		-1	0.07421	0	-11	0.09411	0	-11	-0.01999	0
	-140	0.07444	0	-120	-0.01717	0	-120	0.09842	0		-110	0.11916	0	-120	0.08523	0	-120	-0.02837	0		-30	-4.01175e-05	0	-30	-0.04888	0	-20	-0.10104	0		-129.406	-0.02406	0	-121	0.03057	0	-161	0.0454	0		0	0.01166	0	-10	0.11797	0	-10	0.2715	0
	-139	0.09089	0	-119	-0.05948	0	-119	0.1806	0		-109	-0.01232	0	-119	0.06403	0	-119	-0.10521	0		-29	0.0143	0	-29	-0.03422	0	-19	-0.12449	0		-128.396	-0.02458	0	-120	0.07864	0	-160	0.06046	0		1	-0.02525	0.0077	-9	0.00222	0	-9	0.64451	0
	-138	0.10825	0	-118	-0.0791	0	-118	0.25499	0		-108	-0.14119	0	-118	0.02043	0	-118	-0.1385	0		-28	0.07617	0	-28	-0.07434	0	-18	-0.09972	0		-127.386	-0.0255	0	-119	0.12063	0	-159	0.1286	0		2	0.04592	0.0153	-8	-0.2179	0	-8	0.87749	0
	-137	0.1155	0	-117	-0.06319	0	-117	0.27072	0		-107	-0.21434	0	-117	-0.01296	0	-117	-0.12341	0		-27	0.17827	0	-27	-0.14534	0	-17	-0.03336	0		-126.376	-0.02547	0	-118	0.15434	0	-158	0.20635	0		3	0.21083	0.023	-7	-0.39944	0	-7	0.82915	0
	-136	0.10149	0	-116	-0.0188	0	-116	0.19763	0		-106	-0.20171	0	-116	-0.00965	0	-116	-0.08157	0		-26	0.29477	0	-26	-0.20833	0	-16	0.05237	0		-125.366	-0.02597	0	-117	0.18155	0	-157	0.24031	0		4	0.36909	0.0306	-6	-0.39932	0	-6	0.54435	0
	-135	0.06299	0	-115	0.03124	0	-115	0.04435	0		-105	-0.11419	0	-115	0.03632	0	-115	-0.04577	0		-25	0.39137	0	-25	-0.22833	0	-15	0.12986	0		-124.356	-0.02908	0	-116	0.20665	0	-156	0.20393	0		5	0.42249	0.0381	-5	-0.19909	0	-5	0.21021	0
	-134	0.00927	0	-114	0.06036	0	-114	-0.14231	0		-104	5.19448e-05	0	-114	0.10594	0	-114	-0.04002	0		-24	0.43877	0	-24	-0.19124	0	-14	0.17848	0		-123.346	-0.03467	0	-115	0.23426	0	-155	0.11896	0		6	0.36012	0.0457	-4	0.06299	0	-4	0.00821	0
	-133	-0.03996	0	-113	0.05214	0	-113	-0.29712	0		-103	0.07966	0	-113	0.16331	0	-113	-0.06645	0		-23	0.42413	0	-23	-0.11062	0	-13	0.19269	0		-122.336	-0.03922	0	-114	0.2665	0	-154	0.0448	0		7	0.26442	0.0533	-3	0.19271	0	-3	-0.00835	0
	-132	-0.06308	0	-112	0.00912	0	-112	-0.36599	0		-102	0.08186	0	-112	0.17256	0	-112	-0.10596	0		-22	0.35604	0	-22	-0.02134	0	-12	0.18216	0		-121.326	-0.03747	0	-113	0.3006	0	-153	0.0407	0		8	0.23558	0.0608	-2	0.10043	0	-2	0.08197	0
	-131	-0.04769	0	-111	-0.04796	0	-111	-0.33071	0		-101	0.00483	0	-111	0.11573	0	-111	-0.13126	0		-21	0.26096	0	-21	0.03671	0	-11	0.16398	0		-120.315	-0.02582	0	-112	0.32808	0	-152	0.12412	0		9	0.30443	0.0683	-1	-0.11288	0	-1	0.16536	0
	-130	0.00154	0	-110	-0.09008	0	-110	-0.21666	0		-100	-0.11172	0	-110	0.00314	0	-110	-0.12422	0		-20	0.17284	0	-20	0.03687	0	-10	0.15164	0		-119.305	-0.00528	0	-111	0.33622	0	-151	0.25374	0		10	0.41137	0.0758	0	-0.22585	0	0	0.19013	0
	-129	0.06289	0	-109	-0.09433	0	-109	-0.07977	0		-99	-0.20843	0	-109	-0.1291	0	-109	-0.08709	0		-19	0.11975	0	-19	-0.02257	0	-9	0.14694	0		-118.295	0.01816	0	-110	0.31226	0	-150	0.35026	0		11	0.46628	0.0833	1	-0.07566	0.0153	1	0.18346	0.0307
	-128	0.10646	0	-108	-0.05554	0	-108	0.01998	0		-98	-0.23889	0	-108	-0.23331	0	-108	-0.04139	0		-18	0.113	0	-18	-0.11831	0	-8	0.13931	0		-117.285	0.0363	0	-109	0.24921	0	-149	0.3441	0		12	0.43128	0.0907	2	0.2987	0.0306	2	0.19395	0.0612
	-127	0.10813	0	-107	0.01061	0	-107	0.04521	0		-97	-0.19532	0	-107	-0.27023	0	-107	-0.01524	0		-17	0.1429	0	-17	-0.21305	0	-7	0.11313	0		-116.275	0.04294	0	-108	0.15079	0	-148	0.22025	0		13	0.35105	0.0981	3	0.6721	0.0459	3	0.23268	0.0917
	-126	0.06211	0	-106	0.07481	0	-106	-0.00523	0		-96	-0.1129	0	-106	-0.22554	0	-106	-0.02686	0		-16	0.18319	0	-16	-0.27178	0	-6	0.0588	0		-115.265	0.03709	0	-107	0.03287	0	-147	0.03111	0		14	0.30694	0.1056	4	0.802	0.0611	4	0.27168	0.122
	-125	-0.0146	0	-105	0.10823	0	-105	-0.10143	0		-95	-0.05008	0	-105	-0.11564	0	-105	-0.07351	0		-15	0.20244	0	-15	-0.27579	0	-5	-0.01847	0		-114.255	0.02304	0	-106	-0.08026	0	-146	-0.13235	0		15	0.34078	0.1129	5	0.61604	0.0762	5	0.28926	0.1523
	-124	-0.0887	0	-104	0.09674	0	-104	-0.20188	0		-94	-0.05504	0	-104	0.0197	0	-104	-0.13225	0		-14	0.17791	0	-14	-0.2283	0	-4	-0.09758	0		-113.245	0.00764	0	-105	-0.16387	0	-145	-0.19419	0		16	0.41854	0.1203	6	0.26706	0.0914	6	0.303	0.1824
	-123	-0.12549	0	-103	0.04801	0	-103	-0.27585	0		-93	-0.1367	0	-103	0.13433	0	-103	-0.17174	0		-13	0.10639	0	-13	-0.15004	0	-3	-0.14933	0		-112.235	-0.00354	0	-104	-0.20182	0	-144	-0.13851	0		17	0.46398	0.1277	7	0.0132	0.1064	7	0.35134	0.2125
	-122	-0.10552	0	-102	-0.01205	0	-102	-0.31626	0		-92	-0.2566	0	-102	0.19437	0	-102	-0.16849	0		-12	0.00683	0	-12	-0.06789	0	-2	-0.14954	0		-111.225	-0.00861	0	-103	-0.19236	0	-143	-0.01789	0		18	0.42774	0.135	8	0.02443	0.1215	8	0.44619	0.2424
	-121	-0.03489	0	-101	-0.05212	0	-101	-0.33698	0		-91	-0.347	0	-101	0.19053	0	-101	-0.11854	0		-11	-0.08662	0	-11	-0.00246	0	-1	-0.09101	0		-110.215	-0.00895	0	-102	-0.148	0	-142	0.07989	0		19	0.3288	0.1423	9	0.27138	0.1365	9	0.55342	0.2722
	-120	0.05619	0	-100	-0.05134	0	-100	-0.35746	0		-90	-0.34671	0	-100	0.13887	0	-100	-0.03864	0		-10	-0.13882	0	-10	0.03973	0	0	0.01183	0		-109.205	-0.0067	0	-101	-0.08936	0	-141	0.08554	0		20	0.23453	0.1496	10	0.57544	0.1514	10	0.62789	0.302
	-119	0.12617	0	-99	-0.01009	0	-99	-0.38515	0		-89	-0.23575	0	-99	0.07088	0	-99	0.04328	0		-9	-0.12953	0	-9	0.06663	0	1	0.12832	0.04		-108.195	-0.00215	0	-100	-0.03657	0	-140	-0.01112	0		21	0.2028	0.1569	11	0.76211	0.1663	11	0.6677	0.3316
	-118	0.14094	0	-98	0.04966	0	-98	-0.40683	0		-88	-0.05031	0	-98	0.01812	0	-98	0.10242	0		-8	-0.06379	0	-8	0.09429	0	2	0.22442	0.0797		-107.185	0.00667	0	-99	-0.0023	0	-139	-0.15816	0		22	0.23965	0.1641	12	0.78263	0.1811	12	0.72613	0.3611
	-117	0.08954	0	-97	0.09523	0	-97	-0.39497	0		-87	0.13113	0	-97	-0.00102	0	-97	0.12833	0		-7	0.02797	0	-7	0.13772	0	3	0.27712	0.1189		-106.174	0.02207	0	-98	0.01042	0	-138	-0.27616	0		23	0.30598	0.1714	13	0.71307	0.196	13	0.86063	0.3906
	-116	-0.01014	0	-96	0.09999	0	-96	-0.32577	0		-86	0.22454	0	-96	0.01335	0	-96	0.12739	0		-6	0.10104	0	-6	0.20333	0	4	0.28331	0.1578		-105.164	0.04368	0	-97	0.00561	0	-137	-0.30714	0		24	0.35901	0.1786	14	0.65584	0.2107	14	1.06565	0.4199
	-115	-0.11869	0	-95	0.0577	0	-95	-0.19851	0		-85	0.18189	0	-95	0.04656	0	-95	0.11606	0		-5	0.11451	0	-5	0.28609	0	5	0.25923	0.1963		-104.154	0.0669	0	-96	-0.01001	0	-136	-0.24665	0		25	0.38598	0.1858	15	0.64747	0.2254	15	1.25997	0.4491
	-114	-0.192	0	-94	-0.01295	0	-94	-0.04396	0		-84	0.01656	0	-94	0.07941	0	-94	0.10991	0		-4	0.04893	0	-4	0.37201	0	6	0.2312	0.2344		-103.144	0.08434	0	-95	-0.03007	0	-135	-0.14085	0		26	0.40186	0.193	16	0.65254	0.2401	16	1.35019	0.4782
	-113	-0.1999	0	-93	-0.07644	0	-93	0.08451	0		-83	-0.20081	0	-93	0.09823	0	-93	0.11485	0		-3	-0.08422	0	-3	0.44421	0	7	0.22263	0.2722		-102.134	0.08966	0	-94	-0.0486	0	-134	-0.05336	0		27	0.42157	0.2001	17	0.62991	0.2548	17	1.31566	0.5072
	-112	-0.13846	0	-92	-0.0974	0	-92	0.13436	0		-82	-0.37439	0	-92	0.0999	0	-92	0.12569	0		-2	-0.24544	0	-2	0.48948	0	8	0.24386	0.3096		-101.124	0.08154	0	-93	-0.05874	0	-133	-0.02535	0		28	0.44021	0.2073	18	0.58946	0.2694	18	1.2327	0.5362
	-111	-0.0306	0	-91	-0.05847	0	-91	0.08036	0		-81	-0.4277	0	-91	0.08978	0	-91	0.13188	0		-1	-0.38153	0	-1	0.50296	0	9	0.28961	0.3466		-100.114	0.06487	0	-92	-0.05289	0	-132	-0.05454	0		29	0.4422	0.2144	19	0.57766	0.2839	19	1.2089	0.565
	-110	0.08427	0	-90	0.03025	0	-90	-0.05978	0		-80	-0.33893	0	-90	0.07483	0	-90	0.12615	0		0	-0.4455	0	0	0.48949	0	10	0.34453	0.3833		-99.104	0.04813	0	-91	-0.02629	0	-131	-0.10388	0		30	0.42711	0.2215	20	0.61241	0.2984	20	1.28478	0.5937
	-109	0.16661	0	-89	0.13489	0	-89	-0.22971	0		-79	-0.14991	0	-89	0.05692	0	-89	0.11024	0		1	-0.41354	0.01	1	0.46176	0.02	11	0.39327	0.4196		-98.094	0.0384	0	-90	0.01746	0	-130	-0.13081	0		31	0.4216	0.2286	21	0.64368	0.3129	21	1.39557	0.6223
	-108	0.19142	0	-88	0.21349	0	-88	-0.3581	0		-78	0.05507	0	-88	0.0307	0	-88	0.09388	0		2	-0.29248	0.02	2	0.43637	0.04	12	0.42908	0.4555		-97.0839	0.03694	0	-89	0.06335	0	-129	-0.11563	0		32	0.4606	0.2356	22	0.59111	0.3273	22	1.433	0.6509
	-107	0.15538	0	-87	0.23609	0	-87	-0.3905	0		-77	0.18962	0	-87	-0.01232	0	-87	0.08767	0		3	-0.11513	0.03	3	0.429	0.0598	13	0.45649	0.4912		-96.0738	0.03858	0	-88	0.08852	0	-128	-0.07049	0		33	0.55238	0.2427	23	0.42771	0.3417	23	1.35287	0.6793
	-106	0.07461	0	-86	0.19921	0	-86	-0.31431	0		-76	0.20469	0	-86	-0.07593	0	-86	0.09463	0		4	0.07341	0.0399	4	0.44994	0.0794	14	0.48691	0.5264		-95.0638	0.03522	0	-87	0.07313	0	-127	-0.02602	0		34	0.66033	0.2497	24	0.22597	0.3561	24	1.2271	0.7076
	-105	-0.02459	0	-85	0.12753	0	-85	-0.16429	0		-75	0.10834	0	-85	-0.15269	0	-85	0.1059	0		5	0.23197	0.0497	5	0.50079	0.099	15	0.53012	0.5614		-94.0537	0.0215	0	-86	0.01361	0	-126	-0.00756	0		35	0.72085	0.2567	25	0.11294	0.3704	25	1.18694	0.7358
	-104	-0.11648	0	-84	0.0615	0	-84	-0.00581	0		-74	-0.04267	0	-84	-0.22337	0	-84	0.10403	0		6	0.33517	0.0595	6	0.57312	0.1184	16	0.58682	0.596		-93.0436	-0.00109	0	-85	-0.06988	0	-125	-0.01875	0		36	0.68608	0.2637	26	0.16815	0.3846	26	1.30477	0.764
	-103	-0.18339	0	-83	0.03688	0	-83	0.09609	0		-73	-0.1737	0	-83	-0.26367	0	-83	0.07244	0		7	0.37687	0.0693	7	0.64987	0.1377	17	0.64689	0.6302		-92.0336	-0.02459	0	-84	-0.13845	0	-124	-0.04268	0		37	0.55881	0.2707	27	0.35563	0.3988	27	1.5221	0.792
	-102	-0.21761	0	-82	0.06622	0	-82	0.10676	0		-72	-0.22912	0	-82	-0.25567	0	-82	0.00582	0		8	0.36585	0.079	8	0.70952	0.1569	18	0.69431	0.6642		-91.0235	-0.03923	0	-83	-0.15211	0	-123	-0.05707	0		38	0.39415	0.2776	28	0.55313	0.413	28	1.69353	0.8199
	-101	-0.21857	0	-81	0.13164	0	-81	0.03672	0		-71	-0.19681	0	-81	-0.19777	0	-81	-0.08457	0		9	0.31751	0.0887	9	0.73246	0.176	19	0.71633	0.6978		-90.0134	-0.03975	0	-82	-0.09177	0	-122	-0.05041	0		39	0.26825	0.2846	29	0.65171	0.4271	29	1.71198	0.8478
	-100	-0.1888	0	-80	0.19275	0	-80	-0.06556	0		-70	-0.10936	0	-80	-0.10764	0	-80	-0.17418	0		10	0.24692	0.0983	10	0.70797	0.1949	20	0.71139	0.7311		-89.0034	-0.02907	0	-81	0.02658	0	-121	-0.02717	0		40	0.23701	0.2915	30	0.63537	0.4412	30	1.60564	0.8755
	-99	-0.1317	0	-79	0.20603	0	-79	-0.13868	0		-69	-0.02312	0	-79	-0.01564	0	-79	-0.23572	0		11	0.16615	0.1079	11	0.63917	0.2138	21	0.69136	0.764		-87.9933	-0.01687	0	-80	0.15546	0	-120	0.000326372	0		41	0.3098	0.2984	31	0.5718	0.4553	31	1.51873	0.9032
	-98	-0.05237	0	-78	0.14652	0	-78	-0.13837	0		-68	0.01272	0	-78	0.04859	0	-78	-0.25154	0		12	0.08574	0.1174	12	0.54386	0.2325	22	0.67634	0.7967		-86.9832	-0.01379	0	-79	0.23757	0	-119	0.02476	0		42	0.44911	0.3053	32	0.53204	0.4693	32	1.58975	0.9307
	-97	0.03974	0	-77	0.0211	0	-77	-0.05773	0		-67	-0.01921	0	-77	0.06979	0	-77	-0.22127	0		13	0.01724	0.1269	13	0.45023	0.2511	23	0.68459	0.829		-85.9732	-0.02468	0	-78	0.23535	0	-118	0.05007	0		43	0.59142	0.3121	33	0.52205	0.4833	33	1.83038	0.9582
	-96	0.12936	0	-76	-0.13306	0	-76	0.07164	0		-66	-0.09803	0	-76	0.05401	0	-76	-0.16085	0		14	-0.02659	0.1364	14	0.38841	0.2695	24	0.72291	0.861		-84.9631	-0.04525	0	-77	0.15225	0	-117	0.08579	0		44	0.677	0.319	34	0.49276	0.4972	34	2.1079	0.9856
	-95	0.19744	0	-75	-0.26415	0	-75	0.19728	0		-65	-0.17818	0	-75	0.02472	0	-75	-0.09371	0		15	-0.03556	0.1458	15	0.38074	0.2879	25	0.78258	0.8927		-83.953	-0.06426	0	-76	0.03293	0	-116	0.13474	0		45	0.67703	0.3258	35	0.41269	0.5111	35	2.24501	1.0128
	-94	0.22691	0	-74	-0.32826	0	-74	0.27255	0		-64	-0.21467	0	-74	0.00976	0	-74	-0.03915	0		16	-0.0078	0.1552	16	0.43432	0.3062	26	0.84341	0.9241		-82.9429	-0.07004	0	-75	-0.05913	0	-115	0.18507	0		46	0.60756	0.3326	36	0.32335	0.5249	36	2.15329	1.04
	-93	0.20981	0	-73	-0.308	0	-73	0.27867	0		-63	-0.18632	0	-73	0.02582	0	-73	-0.00431	0		17	0.04623	0.1645	17	0.53889	0.3243	27	0.88388	0.9552		-81.9329	-0.05732	0	-74	-0.07539	0	-114	0.2148	0		47	0.52191	0.3394	37	0.31434	0.5388	37	1.89315	1.0671
	-92	0.15205	0	-72	-0.21897	0	-72	0.23136	0		-62	-0.10551	0	-72	0.06846	0	-72	0.01621	0		18	0.10535	0.1738	18	0.6706	0.3423	28	0.89219	0.986		-80.9228	-0.03021	0	-73	-0.00888	0	-113	0.20669	0		48	0.48099	0.3462	38	0.43658	0.5525	38	1.61987	1.0941
	-91	0.07263	0	-71	-0.10141	0	-71	0.16975	0		-61	-0.01046	0	-71	0.11341	0	-71	0.03368	0		19	0.14567	0.183	19	0.80028	0.3602	29	0.87252	1.0165		-79.9128	0.000306067	0	-72	0.10144	0	-112	0.16276	0		49	0.51508	0.3529	39	0.63776	0.5663	39	1.4691	1.121
	-90	-0.00307	0	-70	-0.00172	0	-70	0.13386	0		-60	0.05473	0	-70	0.12894	0	-70	0.0558	0		20	0.15184	0.1922	20	0.90276	0.378	30	0.84301	1.0467		-78.9027	0.02282	0	-71	0.19127	0	-111	0.10646	0		50	0.60168	0.3597	40	0.78779	0.5799	40	1.47578	1.1478
	-89	-0.05336	0	-69	0.04725	0	-69	0.14306	0		-59	0.0614	0	-69	0.09324	0	-69	0.08077	0		21	0.1258	0.2014	21	0.96367	0.3957	31	0.82665	1.0766		-77.8926	0.03157	0	-70	0.20557	0	-110	0.06958	0		51	0.67844	0.3664	41	0.77874	0.5936	41	1.57994	1.1745
	-88	-0.0691	0	-68	0.03816	0	-68	0.18643	0		-58	0.00866	0	-68	0.00786	0	-68	0.09808	0		22	0.08773	0.2105	22	0.98161	0.4133	32	0.83954	1.1062		-76.8825	0.02866	0	-69	0.1278	0	-109	0.07184	0		52	0.68676	0.3731	42	0.61266	0.6072	42	1.6953	1.2011
	-87	-0.05696	0	-67	-0.01128	0	-67	0.22982	0		-57	-0.07849	0	-67	-0.10001	0	-67	0.09581	0		23	0.06751	0.2196	23	0.96574	0.4308	33	0.88282	1.1355		-75.8725	0.02146	0	-68	-0.01221	0	-108	0.10736	0		53	0.61579	0.3798	43	0.40028	0.6208	43	1.77184	1.2276
	-86	-0.03539	0	-66	-0.06968	0	-66	0.23559	0		-56	-0.16271	0	-66	-0.18814	0	-66	0.0694	0		24	0.09005	0.2286	24	0.93051	0.4481	34	0.94233	1.1646		-74.8624	0.01721	0	-67	-0.15553	0	-107	0.14789	0		54	0.51267	0.3864	44	0.27411	0.6343	44	1.80501	1.2541
	-85	-0.02503	0	-65	-0.10778	0	-65	0.18452	0		-55	-0.21176	0	-65	-0.21792	0	-65	0.02654	0		25	0.16173	0.2376	25	0.89046	0.4654	35	0.99619	1.1933		-73.8524	0.01883	0	-66	-0.2461	0	-106	0.16084	0		55	0.44868	0.3931	45	0.29413	0.6478	45	1.80201	1.2804
	-84	-0.03808	0	-64	-0.11097	0	-64	0.08842	0		-54	-0.21118	0	-64	-0.17189	0	-64	-0.01553	0		26	0.26507	0.2466	26	0.8568	0.4825	36	1.02648	1.2218		-72.8423	0.02451	0	-65	-0.25925	0	-105	0.12998	0		56	0.46626	0.3997	46	0.42358	0.6612	46	1.75318	1.3067
	-83	-0.07202	0	-63	-0.08315	0	-63	-0.01336	0		-53	-0.16716	0	-63	-0.06171	0	-63	-0.03894	0		27	0.36528	0.2555	27	0.83655	0.4995	37	1.02885	1.25		-71.8322	0.03079	0	-64	-0.2109	0	-104	0.06462	0		57	0.54818	0.4063	47	0.58204	0.6746	47	1.64174	1.3328
	-82	-0.11051	0	-62	-0.04158	0	-62	-0.07215	0		-52	-0.10005	0	-62	0.07738	0	-62	-0.03547	0		28	0.426	0.2644	28	0.83314	0.5165	38	1.01515	1.278		-70.8221	0.03656	0	-63	-0.14379	0	-103	-0.0082	0		58	0.63238	0.4129	48	0.71381	0.688	48	1.47903	1.3589
	-81	-0.13156	0	-61	-0.00638	0	-61	-0.05431	0		-51	-0.03337	0	-61	0.2024	0	-61	-0.01187	0		29	0.42682	0.2732	29	0.84713	0.5333	39	1.00773	1.3057		-69.8121	0.04443	0	-62	-0.09995	0	-102	-0.0618	0		59	0.65937	0.4195	49	0.80731	0.7014	49	1.32272	1.3849
	-80	-0.11868	0	-60	0.00913	0	-60	0.04036	0		-50	0.01559	0	-60	0.28072	0	-60	0.01328	0		30	0.37359	0.282	30	0.87616	0.55	40	1.02824	1.3331		-68.802	0.05828	0	-61	-0.09617	0	-101	-0.08483	0		60	0.61359	0.4261	50	0.86229	0.7147	50	1.25058	1.4108
	-79	-0.07007	0	-59	0.00303	0	-59	0.17509	0		-49	0.03975	0	-59	0.30154	0	-59	0.01998	0		31	0.29605	0.2908	31	0.91425	0.5666	41	1.08663	1.3602		-67.7919	0.07867	0	-60	-0.11641	0	-100	-0.08263	0		61	0.52797	0.4326	51	0.85842	0.7279	51	1.30616	1.4366
	-78	-0.000868401	0	-58	-0.01703	0	-58	0.29	0		-48	0.04071	0	-58	0.27551	0	-58	-0.00115	0		32	0.23363	0.2995	32	0.9519	0.5831	42	1.17572	1.3871		-66.7819	0.09978	0	-59	-0.12449	0	-99	-0.06604	0		62	0.45317	0.4391	52	0.77212	0.7411	52	1.46231	1.4623
	-77	0.06251	0	-57	-0.03977	0	-57	0.32733	0		-47	0.02455	0	-57	0.22409	0	-57	-0.04205	0		33	0.21633	0.3082	33	0.97786	0.5995	43	1.27417	1.4137		-65.7718	0.11087	0	-58	-0.08846	0	-98	-0.03845	0		63	0.42077	0.4456	53	0.62668	0.7543	53	1.63657	1.488
	-76	0.09375	0	-56	-0.05632	0	-56	0.25698	0		-46	-0.0016	0	-56	0.16549	0	-56	-0.07998	0		34	0.25038	0.3168	34	0.98314	0.6158	44	1.3561	1.4401		-64.7617	0.10216	0	-57	-0.00188	0	-97	0.00689	0		64	0.4294	0.4521	54	0.51185	0.7674	54	1.74839	1.5135
	-75	0.0786	0	-55	-0.06322	0	-55	0.09084	0		-45	-0.03044	0	-55	0.10539	0	-55	-0.089	0		35	0.31602	0.3254	35	0.96565	0.632	45	1.40276	1.4662		-63.7517	0.07173	0	-56	0.11009	0	-96	0.07597	0		65	0.45916	0.4586	55	0.53103	0.7805	55	1.77382	1.5389
	-74	0.02186	0	-54	-0.06164	0	-54	-0.12057	0		-44	-0.0536	0	-54	0.0378	0	-54	-0.05437	0		36	0.37844	0.334	36	0.93332	0.6481	46	1.41068	1.492		-62.7416	0.02869	0	-55	0.20261	0	-95	0.15877	0		66	0.4947	0.4651	56	0.70898	0.7936	56	1.75526	1.5643
	-73	-0.05367	0	-53	-0.05437	0	-53	-0.30779	0		-43	-0.06131	0	-53	-0.04519	0	-53	0.01781	0		37	0.40627	0.3425	37	0.90339	0.6642	47	1.39262	1.5176		-61.7315	-0.01014	0	-54	0.23384	0	-94	0.22406	0		67	0.53496	0.4715	57	0.94703	0.8066	57	1.76208	1.5896
	-72	-0.11617	0	-52	-0.04334	0	-52	-0.41008	0		-42	-0.04447	0	-52	-0.1412	0	-52	0.10131	0		38	0.38793	0.351	38	0.89745	0.6801	48	1.37128	1.543		-60.7215	-0.02882	0	-53	0.18556	0	-93	0.23265	0		68	0.58431	0.4779	58	1.08255	0.8196	58	1.83604	1.6148
	-71	-0.13776	0	-51	-0.02927	0	-51	-0.39922	0		-41	0.00103	0	-51	-0.23141	0	-51	0.16081	0		39	0.33744	0.3594	39	0.93336	0.6959	49	1.36905	1.5681		-59.7114	-0.02126	0	-52	0.07149	0	-92	0.16345	0		69	0.63892	0.4843	59	1.01655	0.8326	59	1.96474	1.6399
	-70	-0.10601	0	-50	-0.01345	0	-50	-0.28961	0		-40	0.07019	0	-50	-0.28546	0	-50	0.16824	0		40	0.28669	0.3678	40	1.01765	0.7116	50	1.39849	1.5929		-58.7013	0.00512	0	-51	-0.06967	0	-91	0.03462	0		70	0.68365	0.4907	60	0.80235	0.8455	60	2.09921	1.6649
	-69	-0.0292	0	-49	0.000446493	0	-49	-0.13074	0		-39	0.14796	0	-49	-0.27622	0	-49	0.11594	0		41	0.26837	0.3762	41	1.14154	0.7272	51	1.45781	1.6176		-57.6913	0.03358	0	-50	-0.19168	0	-90	-0.09749	0		71	0.70189	0.4971	61	0.6124	0.8584	61	2.1956	1.6898
	-68	0.06688	0	-48	0.00646	0	-48	0.01416	0		-38	0.21333	0	-48	-0.19677	0	-48	0.02037	0		42	0.2986	0.3845	42	1.28281	0.7427	52	1.53255	1.642		-56.6812	0.04812	0	-49	-0.25911	0	-89	-0.16561	0		72	0.68748	0.5034	62	0.60403	0.8712	62	2.24359	1.7147
	-67	0.149	0	-47	-0.000887855	0	-47	0.09368	0		-37	0.2473	0	-47	-0.06977	0	-47	-0.08556	0		43	0.36821	0.3928	43	1.41309	0.7581	53	1.60216	1.6661		-55.6711	0.04315	0	-48	-0.25888	0	-88	-0.13038	0		73	0.64795	0.5098	63	0.79625	0.884	63	2.26046	1.7394
	-66	0.18916	0	-46	-0.02254	0	-46	0.08718	0		-36	0.2411	0	-46	0.05758	0	-46	-0.16729	0		44	0.44722	0.4011	44	1.50757	0.7734	54	1.64813	1.69		-54.6611	0.02701	0	-47	-0.20158	0	-87	-0.00649	0		74	0.59891	0.5161	64	1.06248	0.8968	64	2.2613	1.7641
	-65	0.1748	0	-45	-0.05231	0	-45	0.00933	0		-35	0.20042	0	-45	0.13233	0	-45	-0.20305	0		45	0.49999	0.4093	45	1.55323	0.7886	55	1.66033	1.7137		-53.651	0.01659	0	-46	-0.11433	0	-86	0.14246	0		75	0.55738	0.5224	65	1.2427	0.9095	65	2.23731	1.7887
	-64	0.11248	0	-44	-0.07807	0	-44	-0.10069	0		-34	0.14318	0	-44	0.12031	0	-44	-0.19094	0		46	0.50306	0.4175	46	1.55217	0.8037	56	1.63956	1.7372		-52.6409	0.02649	0	-45	-0.02997	0	-85	0.23921	0		76	0.5382	0.5287	66	1.27357	0.9222	66	2.16512	1.8132
	-63	0.02407	0	-43	-0.08687	0	-43	-0.1995	0		-33	0.09155	0	-43	0.02417	0	-43	-0.14585	0		47	0.45664	0.4256	47	1.51894	0.8188	57	1.59622	1.7604		-51.6309	0.05915	0	-44	0.02344	0	-84	0.23727	0		77	0.55088	0.535	67	1.22265	0.9348	67	2.04066	1.8376
	-62	-0.06256	0	-42	-0.07185	0	-42	-0.25946	0		-32	0.06215	0	-42	-0.1148	0	-42	-0.08892	0		48	0.384	0.4337	48	1.47338	0.8337	58	1.54637	1.7834		-50.6208	0.10243	0	-43	0.02997	0	-83	0.14647	0		78	0.59293	0.5412	68	1.20357	0.9474	68	1.90544	1.8619
	-61	-0.12415	0	-41	-0.03689	0	-41	-0.27906	0		-31	0.05924	0	-41	-0.23333	0	-41	-0.03592	0		49	0.3197	0.4418	49	1.43245	0.8486	59	1.50715	1.8062		-49.6107	0.13621	0	-42	-0.01047	0	-82	0.02363	0		79	0.64456	0.5474	69	1.25805	0.96	69	1.83467	1.8862
	-60	-0.1497	0	-40	0.0039	0	-40	-0.27934	0		-30	0.07422	0	-40	-0.27433	0	-40	0.0088	0		50	0.29286	0.4498	50	1.40447	0.8633	60	1.49247	1.8288		-48.6007	0.14416	0	-41	-0.08257	0	-81	-0.06535	0		80	0.67555	0.5537	70	1.31713	0.9726	70	1.88723	1.9103
	-59	-0.14232	0	-39	0.03259	0	-39	-0.28876	0		-29	0.09127	0	-39	-0.21346	0	-39	0.05011	0		51	0.31409	0.4578	51	1.38806	0.878	61	1.50977	1.8511		-47.5906	0.1235	0	-40	-0.16041	0	-80	-0.08687	0		81	0.66715	0.5599	71	1.2757	0.9851	71	2.05265	1.9344
	-58	-0.11523	0	-38	0.03671	0	-38	-0.32464	0		-28	0.09589	0	-38	-0.07119	0	-38	0.09366	0		52	0.37213	0.4658	52	1.37551	0.8925	62	1.55806	1.8733		-46.5805	0.08652	0	-39	-0.21598	0	-79	-0.0574	0		82	0.63395	0.5661	72	1.10605	0.9975	72	2.24061	1.9584
	-57	-0.08433	0	-37	0.01672	0	-37	-0.38097	0		-27	0.08162	0	-37	0.09586	0	-37	0.13708	0		53	0.44086	0.4737	53	1.35856	0.907	63	1.62731	1.8952		-45.5705	0.05309	0	-38	-0.22972	0	-78	-0.02699	0		83	0.6218	0.5722	73	0.89973	1.01	73	2.33103	1.9823
	-56	-0.06085	0	-36	-0.01276	0	-36	-0.4291	0		-26	0.05171	0	-36	0.22051	0	-36	0.16681	0		54	0.49234	0.4816	54	1.33353	0.9214	64	1.70008	1.9169		-44.5604	0.0387	0	-37	-0.19883	0	-77	-0.04116	0		84	0.67327	0.5784	74	0.79539	1.0224	74	2.25561	2.0062
	-55	-0.04741	0	-35	-0.02936	0	-35	-0.43155	0		-25	0.01531	0	-35	0.25565	0	-35	0.16332	0		55	0.50869	0.4894	55	1.30359	0.9357	65	1.75562	1.9384		-43.5503	0.04552	0	-36	-0.13933	0	-76	-0.10779	0		85	0.78346	0.5845	75	0.85825	1.0347	75	2.05197	2.0299
	-54	-0.03883	0	-34	-0.01429	0	-34	-0.36229	0		-24	-0.0188	0	-34	0.19518	0	-34	0.11232	0		56	0.48751	0.4973	56	1.27736	0.9499	66	1.77603	1.9597		-42.5403	0.06203	0	-35	-0.07949	0	-75	-0.19166	0		86	0.8865	0.5906	76	1.02205	1.047	76	1.84606	2.0536
	-53	-0.02672	0	-33	0.03689	0	-33	-0.22337	0		-23	-0.04695	0	-33	0.07564	0	-33	0.01579	0		57	0.43933	0.505	57	1.26507	0.964	67	1.75277	1.9808		-41.5302	0.0712	0	-34	-0.04677	0	-74	-0.23939	0		87	0.89484	0.5968	77	1.14704	1.0593	77	1.77017	2.0772
	-52	-0.00527	0	-32	0.10974	0	-32	-0.04874	0		-22	-0.07071	0	-32	-0.04213	0	-32	-0.10385	0		58	0.38018	0.5128	58	1.27406	0.9781	68	1.69095	2.0016		-40.5201	0.06188	0	-33	-0.05394	0	-73	-0.21662	0		88	0.76879	0.6028	78	1.14105	1.0716	78	1.87403	2.1007
	-51	0.02483	0	-31	0.17567	0	-31	0.10749	0		-21	-0.09266	0	-31	-0.102	0	-31	-0.20973	0		59	0.32434	0.5205	59	1.30576	0.992	69	1.60898	2.0223		-39.5101	0.03602	0	-32	-0.09163	0	-72	-0.1313	0		89	0.56052	0.6089	79	1.0347	1.0838	79	2.09394	2.1241
	-50	0.05616	0	-30	0.20406	0	-30	0.19386	0		-20	-0.11063	0	-30	-0.07834	0	-30	-0.26479	0		60	0.28113	0.5282	60	1.35519	1.0059	70	1.5328	2.0428		-38.5	0.00716	0	-31	-0.13165	0	-71	-0.02767	0		90	0.38955	0.615	80	0.9462	1.096	80	2.30164	2.1475
	-49	0.07808	0	-29	0.17654	0	-29	0.18495	0		-19	-0.11485	0	-29	0.01362	0	-29	-0.24779	0		61	0.25623	0.5358	61	1.41272	1.0196	71	1.48651	2.0631		-37.4899	-0.00867	0	-30	-0.14009	0	-70	0.04354	0		91	0.36055	0.621	81	0.9719	1.1081	81	2.39378	2.1707
	-48	0.08202	0	-28	0.0964	0	-28	0.09398	0		-18	-0.09049	0	-28	0.12705	0	-28	-0.16341	0		62	0.2549	0.5434	62	1.46729	1.0333	72	1.4831	2.0832		-36.4799	-0.0036	0	-29	-0.09402	0	-69	0.05689	0		92	0.48526	0.627	82	1.10276	1.1202	82	2.35388	2.1939
	-47	0.066	0	-27	-0.01144	0	-27	-0.03181	0		-17	-0.02548	0	-27	0.20715	0	-27	-0.04135	0		63	0.28342	0.551	63	1.50967	1.0469	73	1.51968	2.1031		-35.4698	0.01694	0	-28	0.00684	0	-68	0.02387	0		93	0.672	0.6331	83	1.23874	1.1323	83	2.24464	2.217
	-46	0.036	0	-26	-0.11016	0	-26	-0.13174	0		-16	0.08052	0	-26	0.21719	0	-26	0.07547	0		64	0.3466	0.5585	64	1.53485	1.0604	74	1.57956	2.1228		-34.4597	0.03782	0	-27	0.13923	0	-67	-0.02194	0		94	0.7932	0.6391	84	1.28169	1.1443	84	2.14718	2.24
	-45	0.0036	0	-25	-0.16625	0	-25	-0.15882	0		-15	0.21073	0	-25	0.15445	0	-25	0.14798	0		65	0.44284	0.5661	65	1.54308	1.0738	75	1.64072	2.1423		-33.4497	0.04441	0	-26	0.26679	0	-66	-0.0531	0		95	0.77778	0.645	85	1.21988	1.1563	85	2.10362	2.263
	-44	-0.01888	0	-24	-0.16326	0	-24	-0.10099	0		-14	0.33337	0	-24	0.04912	0	-24	0.15576	0		66	0.56046	0.5735	66	1.53943	1.0872	76	1.68669	2.1616		-32.4396	0.0323	0	-25	0.35613	0	-65	-0.06746	0		96	0.65525	0.651	86	1.13112	1.1683	86	2.10768	2.2859
	-43	-0.02364	0	-23	-0.10804	0	-23	0.01372	0		-13	0.41143	0	-23	-0.05218	0	-23	0.10291	0		67	0.67911	0.581	67	1.532	1.1005	77	1.71457	2.1807		-31.4295	0.01032	0	-24	0.39045	0	-64	-0.08406	0		97	0.52041	0.6569	87	1.10904	1.1802	87	2.13871	2.3086
	-42	-0.01051	0	-22	-0.02699	0	-22	0.13043	0		-12	0.41619	0	-22	-0.10932	0	-22	0.01335	0		68	0.77699	0.5884	68	1.52921	1.1136	78	1.73592	2.1997		-30.4195	-0.00548	0	-23	0.37409	0	-63	-0.12003	0		98	0.45421	0.6629	88	1.18357	1.1921	88	2.1941	2.3314
	-41	0.01316	0	-21	0.04577	0	-21	0.19308	0		-11	0.3389	0	-21	-0.10659	0	-21	-0.08129	0		69	0.84093	0.5957	69	1.53663	1.1267	79	1.76978	2.2184		-29.4094	-0.00279	0	-22	0.32657	0	-62	-0.16842	0		99	0.46883	0.6688	89	1.30478	1.204	89	2.28288	2.354
	-40	0.03564	0	-20	0.08263	0	-20	0.17009	0		-10	0.19521	0	-20	-0.05757	0	-20	-0.15486	0		70	0.87322	0.6031	70	1.55433	1.1397	80	1.83123	2.237		-28.3993	0.01814	0	-21	0.27022	0	-61	-0.19639	0		100	0.51769	0.6747	90	1.39585	1.2158	90	2.3893	2.3765
	-39	0.04531	0	-19	0.07298	0	-19	0.06833	0		-9	0.0205	0	-19	0.00427	0	-19	-0.19455	0		71	0.89062	0.6104	71	1.57593	1.1527	81	1.92114	2.2554		-27.3893	0.044	0	-20	0.21853	0	-60	-0.16772	0		101	0.55087	0.6806	91	1.42036	1.2276	91	2.45334	2.399
	-38	0.03466	0	-18	0.02581	0	-18	-0.07116	0		-8	-0.14193	0	-18	0.04344	0	-18	-0.20086	0		72	0.91446	0.6176	72	1.59014	1.1655	82	2.02297	2.2736		-26.3792	0.05669	0	-19	0.17127	0	-59	-0.07365	0		102	0.55965	0.6864	92	1.40353	1.2394	92	2.4039	2.4214
	-37	0.00239	0	-17	-0.03605	0	-17	-0.19267	0		-7	-0.25471	0	-17	0.03937	0	-17	-0.1812	0		73	0.95661	0.6249	73	1.58494	1.1783	83	2.10868	2.2917		-25.3691	0.04536	0	-18	0.11828	0	-58	0.05243	0		103	0.5717	0.6923	93	1.39622	1.2511	93	2.22706	2.4437
	-36	-0.0468	0	-16	-0.08671	0	-16	-0.25108	0		-6	-0.29701	0	-16	-0.00564	0	-16	-0.14193	0		74	1.00909	0.6321	74	1.55309	1.191	84	2.15144	2.3096		-24.3591	0.01426	0	-17	0.04917	0	-57	0.15072	0		104	0.61004	0.6981	94	1.42287	1.2628	94	2.00709	2.466
	-35	-0.10391	0	-15	-0.10825	0	-15	-0.23045	0		-5	-0.26836	0	-15	-0.07015	0	-15	-0.08412	0		75	1.04441	0.6393	75	1.49695	1.2036	85	2.13912	2.3273		-23.349	-0.01886	0	-16	-0.03717	0	-56	0.17313	0		105	0.66226	0.704	95	1.4626	1.2745	95	1.88959	2.4881
	-34	-0.15803	0	-14	-0.09724	0	-14	-0.14772	0		-4	-0.1855	0	-14	-0.12592	0	-14	-0.00531	0		76	1.02828	0.6464	76	1.43001	1.2162	86	2.08174	2.3448		-22.3389	-0.03324	0	-15	-0.12862	0	-55	0.11771	0		106	0.69207	0.7098	96	1.4755	1.2861	96	1.98108	2.5102
	-33	-0.19843	0	-13	-0.06487	0	-13	-0.04097	0		-3	-0.07491	0	-13	-0.15184	0	-13	0.09398	0		77	0.93928	0.6535	77	1.37387	1.2286	87	2.00879	2.3622		-21.3289	-0.01801	0	-14	-0.2037	0	-54	0.03329	0		107	0.67881	0.7156	97	1.4431	1.2977	97	2.2621	2.5323
	-32	-0.21643	0	-12	-0.03121	0	-12	0.05081	0		-2	0.03526	0	-12	-0.14248	0	-12	0.2037	0		78	0.78548	0.6606	78	1.35105	1.241	88	1.95721	2.3793		-20.3188	0.0206	0	-13	-0.24153	0	-53	-0.01209	0		108	0.64138	0.7213	98	1.38409	1.3092	98	2.59016	2.5542
	-31	-0.20695	0	-11	-0.01646	0	-11	0.10543	0		-1	0.12138	0	-11	-0.10799	0	-11	0.30216	0		79	0.60787	0.6676	79	1.37636	1.2533	89	1.95545	2.3964		-19.3087	0.06243	0	-12	-0.23246	0	-52	0.02128	0		109	0.61953	0.7271	99	1.33508	1.3208	99	2.79955	2.5761
	-30	-0.17009	0	-10	-0.03283	0	-10	0.12422	0		0	0.16746	0	-10	-0.06663	0	-10	0.36127	0		80	0.46682	0.6746	80	1.45032	1.2655	90	2.01119	2.4132		-18.2987	0.08508	0	-11	-0.1841	0	-51	0.11453	0		110	0.63073	0.7328	100	1.31952	1.3323	100	2.82238	2.5978
	-29	-0.11217	0	-9	-0.07994	0	-9	0.12518	0		1	0.1664	0.0153	-9	-0.03471	0	-9	0.35719	0		81	0.4163	0.6816	81	1.55797	1.2777	91	2.10845	2.4299		-17.2886	0.07711	0	-10	-0.11932	0	-50	0.20106	0		111	0.64827	0.7386	101	1.33464	1.3437	101	2.73276	2.6196
	-28	-0.04546	0	-8	-0.14486	0	-8	0.12784	0		2	0.12035	0.0305	-8	-0.01944	0	-8	0.28181	0		82	0.47786	0.6886	82	1.67385	1.2897	92	2.21536	2.4465		-16.2785	0.04438	0	-9	-0.06685	0	-49	0.21385	0		112	0.62642	0.7443	102	1.36321	1.3551	102	2.67742	2.6412
	-27	0.01411	0	-7	-0.20671	0	-7	0.13902	0		3	0.04092	0.0456	-7	-0.01756	0	-7	0.14919	0		83	0.62754	0.6955	83	1.77146	1.3017	93	2.29888	2.4629		-15.2685	0.00589	0	-8	-0.04879	0	-48	0.13745	0		113	0.55077	0.75	103	1.39335	1.3665	103	2.75039	2.6628
	-26	0.05127	0	-6	-0.24385	0	-6	0.1479	0		4	-0.05159	0.0607	-6	-0.01937	0	-6	-0.00679	0		84	0.80372	0.7024	84	1.83299	1.3137	94	2.33913	2.4791		-14.2584	-0.01815	0	-7	-0.07058	0	-47	0.02688	0		114	0.46349	0.7557	104	1.42589	1.3779	104	2.91655	2.6842
	-25	0.05652	0	-5	-0.2414	0	-5	0.13322	0		5	-0.13137	0.0758	-5	-0.01512	0	-5	-0.14324	0		85	0.93361	0.7092	85	1.85506	1.3255	95	2.33671	2.4951		-13.2483	-0.01834	0	-6	-0.11838	0	-46	-0.02394	0		115	0.43474	0.7613	105	1.4666	1.3892	105	3.04709	2.7057
	-24	0.02997	0	-4	-0.19656	0	-4	0.07828	0		6	-0.1731	0.0908	-4	6.25451e-05	0	-4	-0.22331	0		86	0.96646	0.7161	86	1.84782	1.3373	96	2.30998	2.511		-12.2383	-0.00070814	0	-5	-0.16517	0	-45	0.05343	0		116	0.50294	0.767	106	1.51625	1.4005	106	3.03492	2.727
	-23	-0.01811	0	-3	-0.12	0	-3	-0.01507	0		7	-0.1599	0.1057	-3	0.02492	0	-3	-0.22907	0		87	0.89789	0.7228	87	1.82797	1.349	97	2.28411	2.5268		-11.2282	0.01879	0	-4	-0.18292	0	-44	0.24733	0		117	0.63906	0.7726	107	1.56988	1.4118	107	2.8913	2.7483
	-22	-0.07083	0	-2	-0.03255	0	-2	-0.12196	0		8	-0.09026	0.1205	-2	0.05421	0	-2	-0.16673	0		88	0.77295	0.7296	88	1.80926	1.3606	98	2.27795	2.5424		-10.2181	0.02589	0	-3	-0.15527	0	-43	0.4608	0		118	0.76955	0.7783	108	1.62264	1.423	108	2.7421	2.7695
	-21	-0.11132	0	-1	0.04211	0	-1	-0.20298	0		9	0.01944	0.1353	-1	0.08235	0	-1	-0.06228	0		89	0.66594	0.7363	89	1.79537	1.3722	99	2.29528	2.5579		-9.20805	0.01799	0	-2	-0.08494	0	-42	0.56451	0		119	0.83806	0.7839	109	1.6717	1.4342	109	2.72803	2.7906
	-20	-0.12963	0	0	0.08606	0	0	-0.22187	0		10	0.13875	0.1501	0	0.10617	0	0	0.05034	0		90	0.64614	0.743	90	1.77878	1.3837	100	2.32458	2.5732		-8.19799	0.00571	0	-1	0.00772	0	-41	0.47724	0		120	0.84882	0.7895	110	1.71135	1.4453	110	2.8923	2.8116
	-19	-0.12696	0	1	0.09417	0.0137	1	-0.1637	0.0274		11	0.23299	0.1647	1	0.12571	0.0305	1	0.14309	0.061		91	0.7455	0.7497	91	1.74626	1.3951	101	2.34682	2.5883		-7.18792	0.00514	0	0	0.09405	0	-40	0.22236	0		121	0.85201	0.795	111	1.73066	1.4565	111	3.14709	2.8326
	-18	-0.11485	0	2	0.07629	0.0274	2	-0.04381	0.0548		12	0.27547	0.1794	2	0.14345	0.0609	2	0.20399	0.1217		92	0.94366	0.7564	92	1.68806	1.4064	102	2.34674	2.6033		-6.17785	0.02593	0.0069	1	0.14985	0.0137	-39	-0.07832	0		122	0.88629	0.8006	112	1.72245	1.4676	112	3.34275	2.8535
	-17	-0.10964	0	3	0.0533	0.0411	3	0.09729	0.0821		13	0.25726	0.1939	3	0.16339	0.0912	3	0.23948	0.182		93	1.17696	0.763	93	1.60586	1.4177	103	2.32163	2.6182		-5.16779	0.06341	0.0137	2	0.16533	0.0274	-38	-0.27284	0		123	0.9354	0.8062	113	1.69753	1.4786	113	3.38156	2.8743
	-16	-0.12449	0	4	0.04821	0.0547	4	0.21101	0.1092		14	0.19031	0.2084	4	0.19075	0.1213	4	0.26895	0.2419		94	1.36677	0.7695	94	1.51495	1.4289	104	2.28312	2.6329		-4.15772	0.10034	0.0205	3	0.14782	0.041	-37	-0.26851	0		124	0.9416	0.8117	114	1.68549	1.4896	114	3.28655	2.8951
	-15	-0.16269	0	5	0.07586	0.0683	5	0.2617	0.1363		15	0.10252	0.2229	5	0.23221	0.1513	5	0.31453	0.3014		95	1.4533	0.7761	95	1.43888	1.44	105	2.25151	2.6475		-3.14765	0.11759	0.0273	4	0.11643	0.0545	-36	-0.08632	0		125	0.86422	0.8172	115	1.71145	1.5006	115	3.17733	2.9158
	-14	-0.21546	0	6	0.13562	0.0818	6	0.24142	0.1633		16	0.02675	0.2373	6	0.29535	0.1811	6	0.39099	0.3605		96	1.41902	0.7826	96	1.39906	1.4511	106	2.24577	2.6619		-2.13758	0.10701	0.0341	5	0.09214	0.068	-35	0.15407	0		126	0.72641	0.8227	116	1.76407	1.5116	116	3.17828	2.9364
	-13	-0.2652	0	7	0.21081	0.0954	7	0.17182	0.1903		17	-0.01153	0.2516	7	0.38609	0.2108	7	0.50001	0.4193		97	1.29169	0.7891	97	1.40417	1.4621	107	2.2747	2.6762		-1.12752	0.07805	0.0408	6	0.08871	0.0814	-34	0.30919	0		127	0.60355	0.8282	117	1.78707	1.5225	117	3.33091	2.9569
	-12	-0.2929	0	8	0.27544	0.1089	8	0.09263	0.2171		18	-0.00277	0.2659	8	0.50433	0.2403	8	0.63077	0.4777		98	1.1273	0.7956	98	1.44498	1.473	108	2.33342	2.6904		-0.11745	0.05328	0.0475	7	0.10889	0.0947	-33	0.29871	0		128	0.56176	0.8337	118	1.71323	1.5334	118	3.57057	2.9774
	-11	-0.28618	0	9	0.30545	0.1223	9	0.04295	0.2439		19	0.04511	0.2801	9	0.63968	0.2697	9	0.76548	0.5358		99	0.98295	0.802	99	1.49756	1.4838	109	2.40648	2.7044		0.89262	0.05512	0.0542	8	0.14703	0.1079	-32	0.14966	0		129	0.60316	0.8392	119	1.52146	1.5443	119	3.77523	2.9978
	-10	-0.24456	0	10	0.28943	0.1358	10	0.0445	0.2706		20	0.11224	0.2943	10	0.77047	0.299	10	0.88699	0.5934		100	0.89331	0.8084	100	1.53381	1.4946	110	2.47549	2.7183		1.90268	0.09185	0.0609	9	0.19543	0.1211	-31	-0.02835	0		130	0.669	0.8446	120	1.26945	1.5552	120	3.8459	3.0182
	-9	-0.17971	0	11	0.2338	0.1492	11	0.09434	0.2972		21	0.17631	0.3084	11	0.86821	0.3281	11	0.98467	0.6508		101	0.86151	0.8148	101	1.53435	1.5054	111	2.52685	2.732		2.91275	0.15171	0.0675	10	0.24986	0.1342	-30	-0.11812	0		131	0.6975	0.85	121	1.06702	1.566	121	3.76497	3.0384
	-8	-0.11113	0	12	0.15982	0.1625	12	0.16965	0.3237		22	0.22158	0.3224	12	0.9073	0.3571	12	1.0565	0.7077		102	0.86671	0.8211	102	1.49785	1.516	112	2.55586	2.7457		3.92282	0.20914	0.0741	11	0.31076	0.1473	-29	-0.06969	0		132	0.68144	0.8555	122	1.00335	1.5767	122	3.60102	3.0586
	-7	-0.05929	0	13	0.09408	0.1759	13	0.24079	0.3502		23	0.24369	0.3364	13	0.87675	0.3859	13	1.10728	0.7643		103	0.88171	0.8275	103	1.44198	1.5266	113	2.56578	2.7591		4.93289	0.23963	0.0807	12	0.37968	0.1603	-28	0.073	0		133	0.67053	0.8609	123	1.08387	1.5875	123	3.46407	3.0787
	-6	-0.03927	0	14	0.0568	0.1892	14	0.28592	0.3765		24	0.24859	0.3504	14	0.78852	0.4147	14	1.14465	0.8206		104	0.88995	0.8337	104	1.39573	1.5371	114	2.56331	2.7725		5.94295	0.23412	0.0872	13	0.45378	0.1732	-27	0.20797	0		134	0.71672	0.8663	124	1.23003	1.5982	124	3.44092	3.0988
	-5	-0.05713	0	15	0.05393	0.2024	15	0.29986	0.4028		25	0.24724	0.3643	15	0.67777	0.4432	15	1.17551	0.8765		105	0.89248	0.84	105	1.38649	1.5476	115	2.55391	2.7857		6.95302	0.20422	0.0937	14	0.52278	0.186	-26	0.24591	0		135	0.81491	0.8716	125	1.34404	1.6089	125	3.5472	3.1188
	-4	-0.1096	0	16	0.07648	0.2157	16	0.29422	0.429		26	0.24882	0.3781	16	0.59314	0.4717	16	1.20441	0.932		106	0.90245	0.8462	106	1.42824	1.558	116	2.53977	2.7988		7.96309	0.17475	0.1002	15	0.57091	0.1988	-25	0.16654	0		136	0.89764	0.877	126	1.38528	1.6195	126	3.7221	3.1387
	-3	-0.18615	0	17	0.1072	0.2289	17	0.28996	0.4551		27	0.25615	0.3919	17	0.57998	0.5	17	1.23428	0.9872		107	0.93203	0.8524	107	1.51626	1.5683	117	2.52133	2.8118		8.97315	0.16838	0.1067	16	0.58371	0.2115	-24	0.02355	0		137	0.89175	0.8823	127	1.39402	1.6301	127	3.8688	3.1585
	-2	-0.27214	0	18	0.1304	0.242	18	0.30707	0.4812		28	0.26495	0.4056	18	0.66281	0.5282	18	1.26838	1.0421		108	0.98076	0.8586	108	1.6304	1.5785	118	2.50087	2.8247		9.98322	0.19178	0.1132	17	0.5559	0.2242	-23	-0.10162	0		138	0.78629	0.8877	128	1.44366	1.6407	128	3.91732	3.1783
	-1	-0.35188	0	19	0.13977	0.2552	19	0.35654	0.5071		29	0.267	0.4192	19	0.83439	0.5562	19	1.31162	1.0966		109	1.03283	0.8648	109	1.74505	1.5887	119	2.4849	2.8374		10.9933	0.23194	0.1196	18	0.49581	0.2368	-22	-0.16159	0		139	0.64891	0.893	129	1.5649	1.6513	129	3.8692	3.198
	0	-0.41136	0	20	0.1398	0.2683	20	0.4375	0.533		30	0.25508	0.4329	20	1.05652	0.5841	20	1.37019	1.1507		110	1.06516	0.8709	110	1.84017	1.5989	120	2.48324	2.85		12.0034	0.26496	0.126	19	0.42356	0.2493	-21	-0.17516	0		140	0.5734	0.8983	130	1.70987	1.6618	130	3.79191	3.2177
	1	-0.441	0.0069	21	0.14053	0.2814	21	0.53937	0.5588		31	0.22729	0.4464	21	1.27268	0.6119	21	1.44935	1.2046		111	1.06129	0.877	111	1.9081	1.6089	121	2.50456	2.8625		13.0134	0.27176	0.1323	20	0.36323	0.2617	-20	-0.2069	0		141	0.60346	0.8989	131	1.78868	1.6723	131	3.76387	3.2372
	2	-0.43833	0.0137	22	0.14911	0.2944	22	0.6465	0.5845		32	0.18851	0.4599	22	1.42787	0.6395	22	1.5507	1.258		112	1.02244	0.883	112	1.95302	1.619	122	2.55063	2.8748		14.0235	0.2508	0.1387	21	0.33292	0.2741	-19	-0.30982	0		142	0.69898	0.8968	132	1.74683	1.6828	132	3.80999	3.2567
	3	-0.40976	0.0205	23	0.16348	0.3075	23	0.74262	0.6102		33	0.14871	0.4734	23	1.48786	0.667	23	1.67074	1.3112		113	0.9689	0.8891	113	1.98411	1.6289	123	2.61291	2.8871		15.0336	0.21971	0.145	22	0.33719	0.2864	-18	-0.4735	0		143	0.77313	0.8947	133	1.616	1.6932	133	3.8789	3.2762
	4	-0.36999	0.0274	24	0.17242	0.3204	24	0.81379	0.6358		34	0.11892	0.4868	24	1.45047	0.6944	24	1.80163	1.364		114	0.93028	0.8951	114	2.00687	1.6388	124	2.67412	2.8992		16.0436	0.20464	0.1513	23	0.36564	0.2987	-17	-0.61715	0		144	0.76657	0.8925	134	1.4939	1.7036	134	3.88318	3.2956
	5	-0.33784	0.0342	25	0.16234	0.3334	25	0.85017	0.6612		35	0.10686	0.5001	25	1.34484	0.7217	25	1.93422	1.4165		115	0.93003	0.9011	115	2.01809	1.6486	125	2.71478	2.9112		17.0537	0.22383	0.1575	24	0.39812	0.3109	-16	-0.63605	0		145	0.69407	0.8904	135	1.46977	1.714	135	3.77165	3.3149
	6	-0.32909	0.041	26	0.12713	0.3463	26	0.84775	0.6867		36	0.11416	0.5134	26	1.21981	0.7488	26	2.06169	1.4687		116	0.97281	0.907	116	2.00753	1.6584	126	2.72204	2.9231		18.0638	0.27561	0.1638	25	0.41411	0.323	-15	-0.47177	0		146	0.62642	0.8883	136	1.5571	1.7243	136	3.57331	3.3341
	7	-0.3487	0.0477	27	0.07506	0.3592	27	0.81038	0.712		37	0.13618	0.5266	27	1.12626	0.7758	27	2.18187	1.5205		117	1.04215	0.913	117	1.96584	1.6681	127	2.69638	2.9348		19.0738	0.33834	0.17	26	0.40207	0.3351	-14	-0.15908	0		147	0.62754	0.8862	137	1.68706	1.7346	137	3.37458	3.3533
	8	-0.38626	0.0545	28	0.02801	0.3721	28	0.75109	0.7372		38	0.16449	0.5398	28	1.10023	0.8027	28	2.29672	1.572		118	1.10964	0.9189	118	1.8942	1.6777	128	2.65253	2.9465		20.0839	0.38256	0.1762	27	0.36473	0.3471	-13	0.18355	0		148	0.7033	0.8841	138	1.76412	1.7449	138	3.24926	3.3724
	9	-0.41787	0.0613	29	0.01229	0.3849	29	0.69049	0.7624		39	0.19093	0.5529	29	1.15258	0.8294	29	2.40902	1.6232		119	1.15065	0.9247	119	1.80984	1.6873	129	2.6138	2.958		21.094	0.38812	0.1823	28	0.31827	0.3591	-12	0.41613	0		149	0.80338	0.882	139	1.73617	1.7552	139	3.20417	3.3914
	10	-0.41505	0.068	30	0.04525	0.3977	30	0.65129	0.7875		40	0.21131	0.566	30	1.26764	0.856	30	2.51808	1.6741		120	1.15748	0.9306	120	1.74337	1.6968	130	2.60215	2.9695		22.104	0.35586	0.1885	29	0.28555	0.371	-11	0.45349	0		150	0.86838	0.8799	140	1.62526	1.7654	140	3.189	3.4104
	11	-0.35762	0.0747	31	0.1247	0.4105	31	0.64977	0.8125		41	0.22746	0.5791	31	1.41025	0.8825	31	2.61686	1.7246		121	1.1424	0.9364	121	1.72788	1.7062	131	2.62873	2.9808		23.1141	0.307	0.1946	30	0.28624	0.3828	-10	0.30847	0		151	0.87716	0.8778	141	1.50228	1.7666	141	3.1588	3.4124
	12	-0.24478	0.0814	32	0.22731	0.4232	32	0.68802	0.8375		42	0.24641	0.592	32	1.53776	0.9088	32	2.69268	1.7748		122	1.12882	0.9422	122	1.78428	1.7156	132	2.68932	2.992		24.1242	0.2706	0.2007	31	0.32783	0.3946	-9	0.07671	0		152	0.85498	0.8757	142	1.43389	1.7624	142	3.12494	3.4043
	13	-0.09867	0.0881	33	0.31779	0.436	33	0.75114	0.8624		43	0.27711	0.605	33	1.61302	0.9351	33	2.73198	1.8248		123	1.13572	0.948	123	1.90986	1.725	133	2.76672	3.0031		25.1342	0.26685	0.2067	32	0.40136	0.4063	-8	-0.12416	0		153	0.84175	0.8736	143	1.44545	1.7582	143	3.13967	3.3962
	14	0.04268	0.0948	34	0.36509	0.4486	34	0.81245	0.8872		44	0.3258	0.6178	34	1.61472	0.9612	34	2.72727	1.8744		124	1.16438	0.9537	124	2.07601	1.7343	134	2.83878	3.0141		26.1443	0.29608	0.2128	33	0.48423	0.4179	-7	-0.22025	0		154	0.85391	0.8715	144	1.52176	1.754	144	3.22528	3.3881
	15	0.14071	0.1015	35	0.35759	0.4613	35	0.84532	0.9119		45	0.39191	0.6306	35	1.5428	0.9872	35	2.68312	1.9237		125	1.1956	0.9594	125	2.23713	1.7435	135	2.88816	3.025		27.1544	0.33986	0.2188	34	0.54952	0.4295	-6	-0.21098	0		155	0.87404	0.8694	145	1.63281	1.7498	145	3.32076	3.38
	16	0.17346	0.1081	36	0.30959	0.4739	36	0.83672	0.9365		46	0.46649	0.6434	36	1.41805	1.013	36	2.61789	1.9726		126	1.19974	0.9651	126	2.34759	1.7527	136	2.90897	3.0358		28.1644	0.37295	0.2248	35	0.57821	0.441	-5	-0.14887	0		156	0.87273	0.8674	146	1.7556	1.7456	146	3.31265	3.372
	17	0.14623	0.1148	37	0.25523	0.4865	37	0.7953	0.9611		47	0.53409	0.6561	37	1.27611	1.0388	37	2.55964	2.0213		127	1.15439	0.9708	127	2.37943	1.7618	137	2.90776	3.0465		29.1745	0.37855	0.2307	36	0.56856	0.4525	-4	-0.08973	0		157	0.83815	0.8653	147	1.87572	1.7415	147	3.13946	3.3639
	18	0.09006	0.1214	38	0.23245	0.4991	38	0.74916	0.9856		48	0.57781	0.6688	38	1.15714	1.0644	38	2.53705	2.0697		128	1.0601	0.9764	128	2.3331	1.7708	138	2.89865	3.0571		30.1846	0.35754	0.2367	37	0.5377	0.4639	-3	-0.05173	0		158	0.78571	0.8632	148	1.97598	1.7373	148	2.87918	3.3559
	19	0.04794	0.128	39	0.26461	0.5116	39	0.73308	1.01		49	0.58573	0.6814	39	1.09392	1.0899	39	2.56892	2.1178		129	0.94487	0.9821	129	2.23626	1.7798	139	2.89583	3.0675		31.1946	0.32655	0.2426	38	0.51358	0.4752	-2	-0.0119	0		159	0.74213	0.8612	149	2.03141	1.7332	149	2.72564	3.3479
	20	0.05484	0.1346	40	0.34892	0.5241	40	0.77079	1.0343		50	0.55611	0.694	40	1.10157	1.1153	40	2.65657	2.1655		130	0.85399	0.9876	130	2.13134	1.7888	140	2.90717	3.0779		32.2047	0.30684	0.2485	39	0.52039	0.4865	-1	0.06083	0		160	0.72212	0.8591	150	2.02042	1.7291	150	2.84836	3.34
	21	0.12097	0.1412	41	0.45739	0.5366	41	0.86127	1.0586		51	0.49914	0.7065	41	1.1728	1.1405	41	2.78242	2.213		131	0.82949	0.9932	131	2.05731	1.7976	141	2.93201	3.0882		33.2148	0.31122	0.2544	40	0.56469	0.4978	0	0.16463	0		161	0.71932	0.8571	151	1.94317	1.725	151	3.23957	3.332
	22	0.22657	0.1478	42	0.55007	0.549	42	0.97658	1.0828		52	0.43412	0.719	42	1.28077	1.1657	42	2.91583	2.2602		132	0.88946	0.9988	132	2.03395	1.8065	142	2.96362	3.0984		34.2248	0.33722	0.2602	41	0.63008	0.5089	1	0.25003	0.0274		162	0.71707	0.8551	152	1.82909	1.7209	152	3.68214	3.3241
	23	0.33093	0.1543	43	0.5938	0.5614	43	1.07339	1.1069		53	0.38303	0.7314	43	1.38965	1.1907	43	3.02386	2.307		133	1.01767	1.0043	133	2.05552	1.8153	143	2.99435	3.1085		35.2349	0.37024	0.266	42	0.68449	0.52	2	0.24619	0.0547		163	0.7056	0.853	153	1.72377	1.7168	153	3.88453	3.3162
	24	0.39151	0.1609	44	0.57746	0.5738	44	1.1133	1.131		54	0.36301	0.7438	44	1.46912	1.2156	44	3.08277	2.3536		134	1.16909	1.0098	134	2.09626	1.824	144	3.02039	3.1184		36.245	0.39389	0.2718	43	0.69725	0.5311	3	0.11165	0.0817		164	0.68912	0.851	154	1.66278	1.7127	154	3.69123	3.3083
	25	0.3837	0.1674	45	0.51625	0.5862	45	1.08194	1.155		55	0.3809	0.7561	45	1.50704	1.2404	45	3.08572	2.3999		135	1.28906	1.0152	135	2.12476	1.8326	145	3.04347	3.1283		37.255	0.40022	0.2776	44	0.65709	0.5421	4	-0.12651	0.1086		165	0.67822	0.849	155	1.65083	1.7086	155	3.20513	3.3004
	26	0.31152	0.1739	46	0.44331	0.5985	46	0.99702	1.1789		56	0.43187	0.7684	46	1.51458	1.265	46	3.04378	2.4459		136	1.33679	1.0207	136	2.12002	1.8412	146	3.06908	3.1381		38.2651	0.39344	0.2834	45	0.58077	0.553	5	-0.37572	0.1352		166	0.67761	0.8469	156	1.66119	1.7045	156	2.72025	3.2925
	27	0.20425	0.1804	47	0.39317	0.6108	47	0.90065	1.2027		57	0.5027	0.7806	47	1.52063	1.2896	47	2.98047	2.4916		137	1.3021	1.0261	137	2.08169	1.8498	147	3.1023	3.1478		39.2752	0.38487	0.2891	46	0.50626	0.5639	6	-0.52552	0.1617		167	0.68142	0.8449	157	1.65612	1.7005	157	2.51299	3.2847
	28	0.10103	0.1869	48	0.3855	0.623	48	0.83933	1.2264		58	0.57776	0.7928	48	1.55739	1.314	48	2.92242	2.537		138	1.20785	1.0315	138	2.02969	1.8583	148	3.14411	3.1574		40.2852	0.38331	0.2948	47	0.47314	0.5748	7	-0.5113	0.1879		168	0.67937	0.8429	158	1.61481	1.6964	158	2.65344	3.2769
	29	0.03181	0.1934	49	0.41701	0.6353	49	0.84147	1.2501		59	0.64483	0.8049	49	1.64346	1.3383	49	2.8902	2.5822		139	1.09759	1.0368	139	1.99376	1.8668	149	3.18988	3.1669		41.2953	0.38771	0.3005	48	0.50062	0.5855	8	-0.35316	0.214		169	0.66671	0.8409	159	1.55049	1.6924	159	2.98008	3.2691
	30	0.00453	0.1999	50	0.46511	0.6475	50	0.90402	1.2737		60	0.69831	0.817	50	1.77244	1.3625	50	2.89281	2.627		140	1.01534	1.0422	140	1.99815	1.8752	150	3.23103	3.1763		42.3054	0.38766	0.3062	49	0.576	0.5963	9	-0.14381	0.2398		170	0.64866	0.8389	160	1.50442	1.6884	160	3.24676	3.2613
	31	0.00513	0.2063	51	0.50064	0.6597	51	0.99522	1.2973		61	0.73855	0.829	51	1.91353	1.3866	51	2.92728	2.6716		141	0.98724	1.0475	141	2.04892	1.8835	151	3.25853	3.1857		43.3154	0.37138	0.3118	50	0.66101	0.6069	10	0.00762	0.2655		171	0.63655	0.8369	161	1.51822	1.6843	161	3.31394	3.2535
	32	0.00966	0.2128	52	0.50305	0.6718	52	1.07218	1.3207		62	0.76866	0.841	52	2.0245	1.4106	52	2.98262	2.7159		142	1.01347	1.0528	142	2.12997	1.8918	152	3.26648	3.1949		44.3255	0.33602	0.3174	51	0.71328	0.6175	11	0.04058	0.291		172	0.64007	0.8349	162	1.60053	1.6803	162	3.23052	3.2458
	33	0.00131	0.2192	53	0.47036	0.6839	53	1.10415	1.3441		63	0.791	0.8529	53	2.07179	1.4345	53	3.04542	2.7599		143	1.0727	1.0581	143	2.20976	1.9	153	3.25408	3.204		45.3356	0.29286	0.323	52	0.71102	0.6281	12	-0.02403	0.3163		173	0.66179	0.8329	163	1.71073	1.6763	163	3.1552	3.2381
	34	-0.01756	0.2256	54	0.41945	0.696	54	1.08925	1.3674		64	0.80563	0.8648	54	2.04786	1.4582	54	3.10454	2.8037		144	1.13529	1.0633	144	2.25556	1.9082	154	3.22532	3.2131		46.3456	0.26319	0.3286	53	0.6662	0.6386	13	-0.10269	0.3414		174	0.69638	0.8309	164	1.77555	1.6723	164	3.20222	3.2304
	35	-0.02567	0.232	55	0.37726	0.7081	55	1.05568	1.3907		65	0.81165	0.8767	55	1.97691	1.4818	55	3.1532	2.8471		145	1.17748	1.0685	145	2.24842	1.9164	155	3.18726	3.2221		47.3557	0.26664	0.3341	54	0.61777	0.649	14	-0.10614	0.3663		175	0.7339	0.829	165	1.73383	1.6684	165	3.35074	3.2227
	36	0.00469	0.2384	56	0.36794	0.7201	56	1.04642	1.4139		66	0.81007	0.8884	56	1.90516	1.5054	56	3.18837	2.8903		146	1.18988	1.0737	146	2.19206	1.9245	156	3.14797	3.2309		48.3658	0.30886	0.3397	55	0.60807	0.6594	15	0.00338	0.3911		176	0.76441	0.827	166	1.583	1.6644	166	3.48694	3.215
	37	0.08944	0.2448	57	0.40236	0.7321	57	1.09558	1.437		67	0.80605	0.9002	57	1.87945	1.5288	57	3.20903	2.9333		147	1.17713	1.0789	147	2.1113	1.9325	157	3.1151	3.2397		49.3758	0.37644	0.3452	56	0.65623	0.6698	16	0.19077	0.4156		177	0.78228	0.825	167	1.39266	1.6604	167	3.52484	3.2073
	38	0.21939	0.2511	58	0.47448	0.7441	58	1.20871	1.46		68	0.80814	0.9119	58	1.92448	1.5521	58	3.2146	2.9759		148	1.15109	1.0841	148	2.04091	1.9405	158	3.09521	3.2485		50.3859	0.44259	0.3506	57	0.74452	0.6801	17	0.37406	0.44		178	0.78766	0.8231	168	1.26867	1.6565	168	3.48629	3.1997
	39	0.35977	0.2575	59	0.5655	0.756	59	1.35794	1.483		69	0.82441	0.9235	59	2.02987	1.5753	59	3.20495	3.0183		149	1.12262	1.0892	149	2.00999	1.9484	159	3.0932	3.2571		51.396	0.48094	0.3561	58	0.82674	0.6903	18	0.47865	0.4642		179	0.78362	0.8211	169	1.28576	1.6525	169	3.46756	3.1921
	40	0.46414	0.2638	60	0.65262	0.7679	60	1.49479	1.5059		70	0.85706	0.9352	60	2.15428	1.5983	60	3.18153	3.0604		150	1.09696	1.0943	150	2.02902	1.9563	160	3.11136	3.2656		52.406	0.47938	0.3615	59	0.85456	0.7005	19	0.48329	0.4882		180	0.76996	0.8191	170	1.43367	1.6486	170	3.53051	3.1845
	41	0.49594	0.2701	61	0.71785	0.7798	61	1.57432	1.5287		71	0.89896	0.9467	61	2.24539	1.6213	61	3.14879	3.1023		151	1.07442	1.0994	151	2.08549	1.9642	161	3.14796	3.2741		53.4161	0.44598	0.367	60	0.8067	0.7106	20	0.42915	0.512		181	0.73936	0.8172	171	1.61854	1.6447	171	3.62656	3.1769
	42	0.44679	0.2764	62	0.75312	0.7917	62	1.57818	1.5515		72	0.93452	0.9582	62	2.26617	1.6442	62	3.11466	3.1439		152	1.05465	1.1044	152	2.15001	1.9719	162	3.19647	3.2825		54.4262	0.40356	0.3723	61	0.70345	0.7207	21	0.38857	0.5357		182	0.6821	0.8153	172	1.72383	1.6408	172	3.62947	3.1693
	43	0.34161	0.2827	63	0.76046	0.8035	63	1.52434	1.5741		73	0.94566	0.9697	63	2.2145	1.6669	63	3.08953	3.1852		153	1.0404	1.1095	153	2.19015	1.9797	163	3.2463	3.2908		55.4362	0.37625	0.3777	62	0.59742	0.7307	22	0.41636	0.5592		183	0.59877	0.8133	173	1.69051	1.6368	173	3.45006	3.1618
	44	0.22734	0.289	64	0.7487	0.8153	64	1.4584	1.5968		74	0.92029	0.9811	64	2.12563	1.6896	64	3.08388	3.2263		154	1.03766	1.1145	154	2.18546	1.9874	164	3.28596	3.299		56.4463	0.37623	0.3831	63	0.54519	0.7407	23	0.51591	0.5825		184	0.51073	0.8114	174	1.55873	1.633	174	3.12866	3.1543
	45	0.15072	0.2953	65	0.72929	0.8271	65	1.43067	1.6193		75	0.85915	0.9925	65	2.05562	1.7121	65	3.10568	3.2671		155	1.05198	1.1195	155	2.13714	1.995	165	3.30746	3.3071		57.4564	0.39825	0.3884	64	0.57598	0.7506	24	0.64029	0.6056		185	0.45517	0.8094	175	1.43871	1.6291	175	2.81948	3.1468
	46	0.13614	0.3015	66	0.71323	0.8389	66	1.47087	1.6418		76	0.77715	1.0038	66	2.0532	1.7345	66	3.15847	3.3077		156	1.08336	1.1244	156	2.06778	2.0026	166	3.31025	3.3152		58.4664	0.42466	0.3937	65	0.67559	0.7605	25	0.72428	0.6286		186	0.46243	0.8075	176	1.43057	1.6252	176	2.67655	3.1393
	47	0.17499	0.3078	67	0.70952	0.8506	67	1.57332	1.6642		77	0.69796	1.0151	67	2.1341	1.7568	67	3.2407	3.348		157	1.12378	1.1294	157	2.01159	2.0102	167	3.30229	3.3232		59.4765	0.43732	0.399	66	0.79463	0.7703	26	0.72406	0.6514		187	0.53033	0.8056	177	1.55107	1.6213	177	2.73754	3.1318
	48	0.23192	0.314	68	0.72411	0.8623	68	1.70036	1.6865		78	0.64394	1.0264	68	2.27103	1.7791	68	3.34625	3.3881		158	1.15957	1.1343	158	1.99931	2.0177	168	3.29705	3.3311		60.4866	0.42848	0.4043	67	0.87621	0.78	27	0.63866	0.674		188	0.6184	0.8037	178	1.72036	1.6175	178	2.90242	3.1243
	49	0.2646	0.3202	69	0.75847	0.8739	69	1.80203	1.7088		79	0.62644	1.0376	69	2.40498	1.8012	69	3.46562	3.4279		159	1.17789	1.1392	159	2.04464	2.0251	169	3.30733	3.3389		61.4966	0.4042	0.4095	68	0.88678	0.7898	28	0.50246	0.6965		189	0.67211	0.8018	179	1.81733	1.6136	179	3.0208	3.1169
	50	0.24667	0.3264	70	0.80785	0.8856	70	1.84178	1.731		80	0.64129	1.0487	70	2.47323	1.8232	70	3.58736	3.4674		160	1.17377	1.1441	160	2.138	2.0325	170	3.33864	3.3467		62.5067	0.37844	0.4147	69	0.83262	0.7994	29	0.35832	0.7188		190	0.66195	0.7999	180	1.76265	1.6098	180	3.01025	3.1095
	51	0.18184	0.3326	71	0.86056	0.8972	71	1.81506	1.7532		81	0.67209	1.0598	71	2.44036	1.8451	71	3.69971	3.5067		161	1.15347	1.1489	161	2.25026	2.0399	171	3.38559	3.3543		63.5168	0.36264	0.4199	70	0.75344	0.809	30	0.23269	0.7409		191	0.60609	0.7979	181	1.57062	1.6059	181	2.9072	3.1021
	52	0.10181	0.3388	72	0.90014	0.9088	72	1.75135	1.7752		82	0.69957	1.0709	72	2.31687	1.8669	72	3.79253	3.5458		162	1.13195	1.1538	162	2.34448	2.0472	172	3.43346	3.362		64.5268	0.35784	0.4251	71	0.69823	0.8186	31	0.1298	0.7629		192	0.55549	0.796	182	1.33671	1.6021	182	2.81629	3.0947
	53	0.04922	0.345	73	0.91092	0.9203	73	1.69897	1.7972		83	0.71203	1.0819	73	2.15576	1.8886	73	3.8597	3.5846		163	1.12559	1.1586	163	2.39058	2.0545	173	3.46482	3.3695		65.5369	0.3548	0.4303	72	0.69827	0.8281	32	0.04566	0.7847		193	0.55184	0.7942	183	1.17434	1.5983	183	2.81212	3.0873
	54	0.05463	0.3511	74	0.88536	0.9319	74	1.70074	1.8192		84	0.71125	1.0929	74	2.02807	1.9102	74	3.90133	3.6232		164	1.14438	1.1634	164	2.37666	2.0617	174	3.46801	3.3769		66.547	0.34191	0.4354	73	0.75302	0.8376	33	-0.01243	0.8063		194	0.59335	0.7923	184	1.14711	1.5945	184	2.88172	3.08
	55	0.11963	0.3573	75	0.82956	0.9434	75	1.77295	1.841		85	0.71035	1.1038	75	1.98922	1.9317	75	3.92485	3.6615		165	1.18787	1.1682	165	2.3123	2.0689	175	3.44345	3.3843		67.5571	0.3155	0.4405	74	0.83516	0.847	34	-0.01902	0.8278		195	0.63834	0.7904	185	1.23952	1.5907	185	2.95142	3.0727
	56	0.21491	0.3634	76	0.76354	0.9548	76	1.89816	1.8628		86	0.72473	1.1147	76	2.05259	1.9531	76	3.9437	3.6996		166	1.24727	1.1729	166	2.22323	2.076	176	3.40417	3.3916		68.5671	0.28511	0.4456	75	0.90943	0.8564	35	0.05596	0.8491		196	0.64379	0.7885	186	1.37839	1.5869	186	2.96333	3.0653
	57	0.29425	0.3695	77	0.71468	0.9663	77	2.03486	1.8846		87	0.76108	1.1256	77	2.18364	1.9743	77	3.97328	3.7375		167	1.31192	1.1776	167	2.14004	2.0831	177	3.3701	3.3989		69.5772	0.26969	0.4507	76	0.95209	0.8657	36	0.22187	0.8703		197	0.60406	0.7866	187	1.48299	1.5831	187	2.92707	3.058
	58	0.31712	0.3756	78	0.7064	0.9777	78	2.13848	1.9062		88	0.81091	1.1364	78	2.31773	1.9955	78	4.02502	3.7751		168	1.37583	1.1823	168	2.08614	2.0902	178	3.35855	3.4061		70.5872	0.28657	0.4557	77	0.95917	0.875	37	0.449	0.8913		198	0.55415	0.7847	188	1.50889	1.5794	188	2.9026	3.0508
	59	0.26854	0.3817	79	0.74704	0.9891	79	2.18252	1.9278		89	0.85278	1.1471	79	2.39293	2.0166	79	4.10074	3.8125		169	1.43986	1.187	169	2.07021	2.0972	179	3.37586	3.4132		71.5973	0.33987	0.4608	78	0.94076	0.8842	38	0.67283	0.9121		199	0.53461	0.7829	189	1.46142	1.5756	189	2.93727	3.0435
	60	0.16608	0.3878	80	0.8246	1.0004	80	2.16927	1.9494		90	0.8629	1.1579	80	2.38166	2.0376	80	4.19012	3.8496		170	1.50787	1.1917	170	2.08557	2.1041	180	3.41433	3.4202		72.6074	0.41601	0.4658	79	0.90801	0.8934	39	0.82167	0.9328		200	0.55159	0.781	190	1.37829	1.5719	190	3.02036	3.0363
	61	0.05094	0.3939	81	0.91061	1.0118	81	2.12545	1.9708		91	0.82866	1.1685	81	2.30516	2.0585	81	4.27291	3.8866		171	1.57924	1.1963	171	2.11609	2.1111	181	3.45638	3.4272		73.6175	0.4895	0.4708	80	0.86429	0.9025	40	0.85254	0.9534		201	0.57084	0.7792	191	1.29898	1.5681	191	3.09626	3.029
	62	-0.0319	0.3999	82	0.97207	1.0231	82	2.08599	1.9922		92	0.75792	1.1792	82	2.22347	2.0793	82	4.3259	3.9232		172	1.64318	1.2009	172	2.14523	2.1179	182	3.48382	3.4341		74.6275	0.53618	0.4758	81	0.80727	0.9116	41	0.77395	0.9738		202	0.5529	0.7773	192	1.24237	1.5644	192	3.11856	3.0218
	63	-0.05436	0.406	83	0.98612	1.0344	83	2.07516	2.0136		93	0.6782	1.1898	83	2.20557	2.1	83	4.33212	3.9597		173	1.67959	1.2055	173	2.1637	2.1248	183	3.48753	3.4409		75.6376	0.54596	0.4807	82	0.73969	0.9207	42	0.64142	0.994		203	0.49608	0.7755	193	1.2046	1.5607	193	3.08901	3.0146
	64	-0.01677	0.412	84	0.95047	1.0456	84	2.09521	2.0349		94	0.62532	1.2003	84	2.29425	2.1206	84	4.28857	3.9959		174	1.66773	1.2101	174	2.17258	2.1316	184	3.47249	3.4477		76.6476	0.52758	0.4856	83	0.67885	0.9296	43	0.52863	1.0141		204	0.44478	0.7736	194	1.17414	1.5569	194	3.04415	3.0074
	65	0.05491	0.418	85	0.88439	1.0568	85	2.12787	2.0561		95	0.62656	1.2108	85	2.48321	2.1411	85	4.20908	4.0319		175	1.59886	1.2147	175	2.18087	2.1383	185	3.45538	3.4544		77.6577	0.50254	0.4906	84	0.65463	0.9386	44	0.49085	1.0341		205	0.45209	0.7718	195	1.14996	1.5532	195	3.00661	3.0003
	66	0.12338	0.424	86	0.81954	1.068	86	2.14718	2.0772		96	0.68676	1.2213	86	2.71769	2.1615	86	4.12069	4.0677		176	1.48565	1.2192	176	2.19933	2.145	186	3.45577	3.461		78.6678	0.49189	0.4955	85	0.69393	0.9475	45	0.54133	1.0539		206	0.53004	0.7699	196	1.14699	1.5495	196	2.95507	2.9931
	67	0.15811	0.43	87	0.78527	1.0792	87	2.13606	2.0983		97	0.78475	1.2317	87	2.91865	2.1818	87	4.05501	4.1032		177	1.36186	1.2237	177	2.2338	2.1517	187	3.48551	3.4676		79.6779	0.50412	0.5003	86	0.7999	0.9563	46	0.65187	1.0735		207	0.63472	0.7681	197	1.18222	1.5458	197	2.84768	2.986
	68	0.14805	0.436	88	0.79543	1.0904	88	2.09731	2.1193		98	0.88254	1.2421	88	3.01892	2.202	88	4.03802	4.1386		178	1.2703	1.2282	178	2.28124	2.1583	188	3.54169	3.4741		80.6879	0.53125	0.5052	87	0.94058	0.9652	47	0.77408	1.093		208	0.70238	0.7663	198	1.25111	1.5422	198	2.67831	2.9789
	69	0.10345	0.442	89	0.84328	1.1015	89	2.05309	2.1402		99	0.94332	1.2524	89	2.99395	2.2221	89	4.0826	4.1737		179	1.24371	1.2327	179	2.33013	2.1649	189	3.60715	3.4806		81.698	0.55541	0.51	88	1.05745	0.9739	48	0.86633	1.1124		209	0.70436	0.7644	199	1.31426	1.5385	199	2.50704	2.9718
	70	0.04754	0.4479	90	0.90657	1.1126	90	2.03347	2.1611		100	0.94937	1.2627	90	2.87247	2.2421	90	4.18644	4.2086		180	1.2877	1.2372	180	2.36472	2.1714	190	3.65837	3.4869		82.7081	0.56128	0.5148	89	1.09316	0.9826	49	0.91073	1.1316		210	0.6692	0.7626	200	1.31142	1.5348	200	2.42583	2.9647
	71	0.00356	0.4539	91	0.95975	1.1236	91	2.06012	2.1819		101	0.91097	1.273	91	2.72239	2.262	91	4.33559	4.2432		181	1.37521	1.2416	181	2.3712	2.1779	191	3.67694	3.4933		83.7181	0.54648	0.5196	90	1.024	0.9913	50	0.91311	1.1507		211	0.6505	0.7608	201	1.2004	1.5312	201	2.48241	2.9577
	72	-0.01562	0.4598	92	0.98671	1.1347	92	2.13406	2.2027		102	0.86166	1.2832	92	2.61891	2.2818	92	4.51113	4.2777		182	1.45669	1.246	182	2.343	2.1844	192	3.65889	3.4995		84.7282	0.52338	0.5244	91	0.87806	0.9999	51	0.89027	1.1696		212	0.67085	0.759	202	0.99648	1.5275	202	2.63134	2.9506
	73	-0.01043	0.4657	93	0.98739	1.1457	93	2.23376	2.2234		103	0.84195	1.2934	93	2.61034	2.3016	93	4.69552	4.3119		183	1.4823	1.2504	183	2.28342	2.1908	193	3.61702	3.5057		85.7383	0.51118	0.5292	92	0.72597	1.0085	52	0.85599	1.1884		213	0.6967	0.7572	203	0.78069	1.5239	203	2.76323	2.9436
	74	0.00989	0.4716	94	0.97527	1.1567	94	2.32463	2.244		104	0.8794	1.3035	94	2.6977	2.3212	94	4.8756	4.3459		184	1.42595	1.2548	184	2.20494	2.1971	194	3.57513	3.5119		86.7483	0.52356	0.5339	93	0.64686	1.0171	53	0.81525	1.2071		214	0.67094	0.7554	204	0.66304	1.5203	204	2.79385	2.9366
	75	0.03524	0.4775	95	0.96775	1.1677	95	2.37492	2.2646		105	0.97503	1.3136	95	2.83696	2.3407	95	5.04188	4.3797		185	1.29935	1.2592	185	2.1259	2.2035	195	3.55674	3.5179		87.7584	0.55973	0.5386	94	0.68702	1.0256	54	0.76879	1.2256		215	0.57378	0.7536	205	0.71901	1.5167	205	2.73504	2.9296
	76	0.06067	0.4834	96	0.97528	1.1786	96	2.37025	2.2851		106	1.10253	1.3237	96	2.96208	2.3602	96	5.18552	4.4133		186	1.14841	1.2635	186	2.06575	2.2098	196	3.57405	3.524		88.7685	0.60452	0.5433	95	0.83439	1.034	55	0.72201	1.244		216	0.45262	0.7518	206	0.9402	1.513	206	2.67927	2.9227
	77	0.08716	0.4893	97	0.99538	1.1895	97	2.31972	2.3055		107	1.22063	1.3337	97	3.01669	2.3796	97	5.29615	4.4467		187	1.03321	1.2678	187	2.04033	2.216	197	3.62218	3.5299		89.7785	0.63732	0.548	96	1.02402	1.0424	56	0.69021	1.2622		217	0.388	0.75	207	1.23426	1.5094	207	2.70576	2.9157
	78	0.11748	0.4951	98	1.01498	1.2004	98	2.25111	2.3259		108	1.2921	1.3437	98	2.9795	2.3988	98	5.36264	4.4799		188	1.00087	1.2721	188	2.05795	2.2223	198	3.68157	3.5358		90.7886	0.64419	0.5527	97	1.17203	1.0508	57	0.69534	1.2803		218	0.42326	0.7482	208	1.47592	1.5058	208	2.79233	2.9088
	79	0.1507	0.501	99	1.01922	1.2112	99	2.19807	2.3462		109	1.30015	1.3536	99	2.87162	2.418	99	5.37718	4.5129		189	1.06448	1.2764	189	2.117	2.2284	199	3.72708	3.5417		91.7987	0.62543	0.5573	98	1.21928	1.0591	58	0.75607	1.2983		219	0.52295	0.7464	209	1.57612	1.5023	209	2.82075	2.9018
	80	0.17975	0.5068	100	1.00146	1.2221	100	2.18574	2.3665		110	1.25432	1.3635	100	2.74382	2.4371	100	5.34051	4.5456		190	1.19835	1.2806	190	2.20544	2.2346	200	3.73932	3.5475		92.8087	0.59407	0.5619	99	1.16025	1.0674	59	0.87752	1.3161		220	0.60209	0.7447	210	1.52493	1.4987	210	2.68336	2.8949
	81	0.19388	0.5127	101	0.96836	1.2329	101	2.22137	2.3867		111	1.18376	1.3734	101	2.65108	2.4561	101	5.26521	4.5782		191	1.35166	1.2849	191	2.30272	2.2407	201	3.71298	3.5532		93.8188	0.56665	0.5666	100	1.04114	1.0756	60	1.04691	1.3339		221	0.60271	0.7429	211	1.38448	1.4951	211	2.40165	2.888
	82	0.18499	0.5185	102	0.93682	1.2437	102	2.2936	2.4068		112	1.12206	1.3832	102	2.62732	2.475	102	5.17438	4.6105		192	1.47321	1.2891	192	2.38436	2.2467	202	3.65844	3.5589		94.8289	0.55257	0.5711	101	0.92965	1.0838	61	1.23699	1.3514		222	0.54753	0.7411	212	1.24332	1.4916	212	2.14313	2.8812
	83	0.15375	0.5243	103	0.92456	1.2544	103	2.37967	2.4269		113	1.092	1.393	103	2.67235	2.4938	103	5.09545	4.6427		193	1.53479	1.2933	193	2.42863	2.2528	203	3.59662	3.5645		95.8389	0.5491	0.5757	102	0.87491	1.092	62	1.41471	1.3689		223	0.51828	0.7394	213	1.166	1.488	213	2.10252	2.8743
	84	0.11149	0.5301	104	0.93952	1.2652	104	2.45616	2.4469		114	1.09756	1.4027	104	2.75608	2.5125	104	5.0513	4.6746		194	1.54123	1.2975	194	2.42373	2.2588	204	3.54983	3.5701		96.849	0.54524	0.5803	103	0.88171	1.1001	63	1.55033	1.3862		224	0.57519	0.7376	214	1.16737	1.4845	214	2.33379	2.8675
	85	0.07618	0.5358	105	0.97467	1.2759	105	2.50786	2.4668		115	1.1267	1.4124	105	2.83646	2.5312	105	5.05251	4.7064		195	1.52279	1.3016	195	2.37287	2.2647	205	3.53315	3.5756		97.8591	0.53165	0.5848	104	0.91341	1.1081	64	1.62351	1.4034		225	0.6918	0.7358	215	1.21833	1.4809	215	2.67689	2.8606
	86	0.06439	0.5416	106	1.01146	1.2865	106	2.53128	2.4867		116	1.16178	1.4221	106	2.88129	2.5497	106	5.09413	4.7379		196	1.51465	1.3058	196	2.29484	2.2706	206	3.54981	3.5811		98.8691	0.50969	0.5893	105	0.92029	1.1162	65	1.6258	1.4205		226	0.76969	0.7341	216	1.27002	1.4774	216	2.85666	2.8538
	87	0.08354	0.5473	107	1.03036	1.2972	107	2.53224	2.5066		117	1.19123	1.4317	107	2.88305	2.5682	107	5.15841	4.7693		197	1.53502	1.3099	197	2.21856	2.2765	207	3.5921	3.5865		99.8792	0.49309	0.5938	106	0.87455	1.1241	66	1.56113	1.4374		227	0.72603	0.7323	217	1.27956	1.4739	217	2.69087	2.847
	88	0.12864	0.5531	108	1.02278	1.3078	108	2.52001	2.5263		118	1.21524	1.4413	108	2.86009	2.5865	108	5.22211	4.8004		198	1.57396	1.314	198	2.1729	2.2824	208	3.64617	3.5919		100.889	0.50043	0.5983	107	0.78976	1.1321	67	1.44558	1.4542		228	0.57705	0.7306	218	1.22841	1.4704	218	2.24499	2.8402
	89	0.18528	0.5588	109	0.99732	1.3184	109	2.50179	2.546		119	1.24283	1.4508	109	2.84491	2.6048	109	5.26518	4.8314		199	1.59897	1.3181	199	2.17522	2.2882	209	3.69811	3.5972		101.899	0.54287	0.6027	108	0.71253	1.14	68	1.30611	1.4709		229	0.4378	0.7289	219	1.13156	1.4669	219	1.80363	2.8335
	90	0.23691	0.5645	110	0.97646	1.329	110	2.48036	2.5657		120	1.28234	1.4604	110	2.86633	2.623	110	5.27712	4.8621		200	1.57429	1.3222	200	2.22344	2.2939	210	3.73838	3.6024		102.909	0.61491	0.6072	109	0.69243	1.1479	69	1.1767	1.4875		230	0.43037	0.7271	220	1.03503	1.4634	220	1.67169	2.8267
	91	0.27239	0.5702	111	0.9846	1.3395	111	2.45549	2.5852		121	1.33202	1.4698	111	2.93483	2.6411	111	5.25899	4.8927		201	1.48336	1.3262	201	2.2956	2.2997	211	3.76316	3.6076		103.919	0.6945	0.6116	110	0.7492	1.1557	70	1.09084	1.5039		231	0.57626	0.7254	221	0.9972	1.4599	221	1.95657	2.82
	92	0.28962	0.5759	112	1.03371	1.3501	112	2.42742	2.6048		122	1.37689	1.4793	112	3.03772	2.6592	112	5.22111	4.9231		202	1.34207	1.3303	202	2.35796	2.3054	212	3.7732	3.6128		104.93	0.7532	0.616	111	0.85861	1.1635	71	1.07176	1.5202		232	0.76838	0.7237	222	1.05609	1.4564	222	2.49894	2.8133
	93	0.29382	0.5816	113	1.11428	1.3606	113	2.39987	2.6242		123	1.39479	1.4887	113	3.1457	2.6771	113	5.1783	4.9533		203	1.19514	1.3343	203	2.379	2.311	213	3.77159	3.6179		105.94	0.77095	0.6204	112	0.96584	1.1712	72	1.12409	1.5365		233	0.85319	0.7219	223	1.19924	1.453	223	2.99975	2.8066
	94	0.29233	0.5873	114	1.19704	1.3711	114	2.38035	2.6436		124	1.36885	1.498	114	3.22653	2.695	114	5.14523	4.9833		204	1.09691	1.3383	204	2.34336	2.3166	214	3.76198	3.623		106.95	0.74667	0.6248	113	1.01835	1.1789	73	1.23085	1.5525		234	0.75774	0.7202	224	1.36056	1.4495	224	3.23493	2.7999
	95	0.28976	0.593	115	1.2453	1.3815	115	2.37736	2.663		125	1.29953	1.5074	115	3.25876	2.7127	115	5.13338	5.0131		205	1.08599	1.3423	205	2.25952	2.3222	215	3.74794	3.628		107.96	0.69866	0.6291	114	0.99767	1.1866	74	1.35798	1.5685		235	0.55411	0.7185	225	1.45554	1.4461	225	3.18733	2.7933
	96	0.28677	0.5986	116	1.23249	1.3919	116	2.39602	2.6823		126	1.20877	1.5166	116	3.23925	2.7304	116	5.14967	5.0427		206	1.16654	1.3462	206	2.15723	2.3278	216	3.73309	3.6329		108.97	0.65454	0.6335	115	0.93038	1.1942	75	1.46514	1.5843		236	0.40403	0.7168	226	1.43716	1.4426	226	3.0061	2.7866
	97	0.28314	0.6042	117	1.156	1.4023	117	2.43459	2.7015		127	1.1331	1.5259	117	3.18209	2.748	117	5.19605	5.0722		207	1.30559	1.3502	207	2.07537	2.3333	217	3.72112	3.6379		109.98	0.63662	0.6378	116	0.87156	1.2018	76	1.51908	1.6001		237	0.42698	0.7151	227	1.33247	1.4392	227	2.85196	2.78
	98	0.28238	0.6099	118	1.04063	1.4127	118	2.48398	2.7207		128	1.1079	1.5351	118	3.11066	2.7656	118	5.26902	5.1014		208	1.44772	1.3541	208	2.04518	2.3388	218	3.71518	3.6427		110.99	0.65137	0.6421	117	0.87103	1.2093	77	1.50458	1.6157		238	0.60083	0.7134	228	1.22793	1.4358	228	2.77313	2.7734
	99	0.29372	0.6155	119	0.92933	1.4231	119	2.53102	2.7398		129	1.15046	1.5443	119	3.04773	2.783	119	5.35913	5.1305		209	1.53974	1.358	209	2.07666	2.3443	219	3.71674	3.6475		112	0.68847	0.6464	118	0.94362	1.2168	78	1.42931	1.6312		239	0.77739	0.7117	229	1.20891	1.4323	229	2.71095	2.7667
	100	0.32857	0.6211	120	0.86557	1.4334	120	2.56421	2.7588		130	1.25053	1.5534	120	3.00813	2.8004	120	5.45156	5.1594		210	1.55326	1.3619	210	2.15428	2.3497	220	3.72496	3.6523		113.01	0.72935	0.6506	119	1.06161	1.2243	79	1.32096	1.6466		240	0.80002	0.71	230	1.29726	1.4289	230	2.60584	2.7602
	101	0.39235	0.6267	121	0.87535	1.4437	121	2.57941	2.7778		131	1.37362	1.5625	121	2.99658	2.8176	121	5.52897	5.1881		211	1.49452	1.3658	211	2.24427	2.3551	221	3.73693	3.657		114.02	0.75907	0.6549	120	1.17358	1.2317	80	1.21749	1.6618		241	0.62712	0.7083	231	1.43648	1.4255	231	2.48461	2.7536
	102	0.47595	0.6322	122	0.95706	1.454	122	2.58265	2.7968		132	1.47598	1.5716	122	3.00988	2.8348	122	5.57691	5.2166		212	1.39775	1.3696	212	2.31011	2.3604	222	3.7492	3.6617		115.03	0.77405	0.6591	121	1.23744	1.2391	81	1.15345	1.677		242	0.36335	0.7066	232	1.5382	1.4221	232	2.43887	2.747
	103	0.55314	0.6378	123	1.08346	1.4642	123	2.58829	2.8156		133	1.52437	1.5806	123	3.04103	2.8519	123	5.59008	5.245		213	1.30633	1.3735	213	2.32905	2.3657	223	3.75951	3.6663		116.04	0.7813	0.6633	122	1.24635	1.2464	82	1.14711	1.692		243	0.17825	0.7049	233	1.55358	1.4187	233	2.51894	2.7405
	104	0.58743	0.6434	124	1.21409	1.4745	124	2.61286	2.8344		134	1.51078	1.5896	124	3.0824	2.869	124	5.57645	5.2731		214	1.25196	1.3773	214	2.30173	2.371	224	3.76774	3.6709		117.05	0.79049	0.6675	123	1.23125	1.2538	83	1.19347	1.707		244	0.18229	0.7033	234	1.511	1.4154	234	2.65623	2.734
	105	0.54753	0.6489	125	1.31207	1.4847	125	2.66683	2.8532		135	1.45493	1.5986	125	3.12689	2.8859	125	5.55625	5.3011		215	1.24214	1.3811	215	2.25056	2.3763	225	3.77514	3.6755		118.06	0.80503	0.6717	124	1.23851	1.261	84	1.26695	1.7218		245	0.35801	0.7016	235	1.48787	1.412	235	2.70277	2.7275
	106	0.42474	0.6544	126	1.35747	1.4948	126	2.74796	2.8719		136	1.39332	1.6075	126	3.16765	2.9028	126	5.55491	5.3289		216	1.26112	1.3849	216	2.20776	2.3815	226	3.78226	3.68		119.07	0.81859	0.6759	125	1.29712	1.2683	85	1.33406	1.7365		246	0.59149	0.6999	236	1.53861	1.4086	236	2.56235	2.721
	107	0.24348	0.66	127	1.35203	1.505	127	2.83957	2.8906		137	1.36029	1.6164	127	3.19809	2.9196	127	5.59207	5.3566		217	1.28231	1.3886	217	2.19929	2.3867	227	3.78692	3.6844		120.081	0.81956	0.68	126	1.39629	1.2755	86	1.37092	1.7511		247	0.76604	0.6982	237	1.63907	1.4053	237	2.29245	2.7145
	108	0.05801	0.6655	128	1.31445	1.5151	128	2.91553	2.9091		138	1.3707	1.6253	128	3.21331	2.9363	128	5.67143	5.3841		218	1.2846	1.3924	218	2.23267	2.3918	228	3.78388	3.6889		121.091	0.80039	0.6842	127	1.48824	1.2826	87	1.37708	1.7656		248	0.83713	0.6966	238	1.69558	1.4019	238	2.07388	2.708
	109	-0.06547	0.671	129	1.2698	1.5252	129	2.95058	2.9277		139	1.41296	1.6341	129	3.2127	2.9529	129	5.77678	5.4114		219	1.26364	1.3961	219	2.2946	2.3969	229	3.76695	3.6932		122.101	0.76526	0.6883	128	1.51496	1.2898	88	1.37712	1.78		249	0.83532	0.6949	239	1.61514	1.3986	239	2.06364	2.7016
	110	-0.07487	0.6765	130	1.23891	1.5353	130	2.93235	2.9462		140	1.45592	1.6429	130	3.20192	2.9695	130	5.87725	5.4385		220	1.23261	1.3998	220	2.35935	2.402	230	3.73286	3.6976		123.111	0.73017	0.6924	129	1.44282	1.2968	89	1.40704	1.7942		250	0.81119	0.6933	240	1.38329	1.3953	240	2.25788	2.6952
	111	0.04482	0.6819	131	1.23216	1.5454	131	2.86947	2.9646		141	1.46614	1.6516	131	3.19242	2.9859	131	5.94048	5.4655		221	1.21339	1.4035	221	2.40313	2.4071	231	3.68498	3.7018		124.121	0.71486	0.6965	130	1.2843	1.3039	90	1.49147	1.8084		251	0.78185	0.6916	241	1.08908	1.3919	241	2.49014	2.6887
	112	0.26231	0.6874	132	1.24943	1.5554	132	2.79142	2.9829		142	1.42676	1.6603	132	3.19784	3.0023	132	5.94837	5.4923		222	1.22359	1.4072	222	2.41668	2.4121	232	3.63428	3.7061		125.131	0.73113	0.7005	131	1.09361	1.3109	91	1.62429	1.8225		252	0.72635	0.69	242	0.87669	1.3886	242	2.57247	2.6823
	113	0.50982	0.6929	133	1.28428	1.5654	133	2.73861	3.0012		143	1.34834	1.669	133	3.22841	3.0186	133	5.90796	5.5189		223	1.267	1.4109	223	2.40929	2.4171	233	3.59642	3.7103		126.141	0.77504	0.7046	132	0.93905	1.3179	92	1.76571	1.8365		253	0.62549	0.6883	243	0.85804	1.3853	243	2.4582	2.676
	114	0.70832	0.6983	134	1.32893	1.5754	134	2.7458	3.0195		144	1.2659	1.6776	134	3.28616	3.0349	134	5.85151	5.5453		224	1.3322	1.4145	224	2.40214	2.4221	234	3.58566	3.7041		127.151	0.82837	0.7086	133	0.86864	1.3248	93	1.8605	1.8503		254	0.50006	0.6867	244	1.04636	1.382	244	2.28232	2.6696
	115	0.79781	0.7037	135	1.37707	1.5854	135	2.8255	3.0377		145	1.22336	1.6863	135	3.36364	3.051	135	5.82467	5.5716		225	1.39922	1.4182	225	2.41457	2.427	235	3.60821	3.6937		128.161	0.86873	0.7126	134	0.88888	1.3317	94	1.86912	1.8641		255	0.40709	0.6851	245	1.35162	1.3787	245	2.24207	2.6632
	116	0.75971	0.7092	136	1.42366	1.5953	136	2.95919	3.0558		146	1.25249	1.6948	136	3.44691	3.0671	136	5.86721	5.5977		226	1.44982	1.4218	226	2.45091	2.4319	236	3.65853	3.6833		129.171	0.88254	0.7166	135	0.96772	1.3386	95	1.7944	1.8777		256	0.39586	0.6834	246	1.63348	1.3755	246	2.42073	2.6569
	117	0.62201	0.7146	137	1.46328	1.6052	137	3.10179	3.0739		147	1.35657	1.7034	137	3.52179	3.0831	137	5.99454	5.6237		227	1.47533	1.4254	227	2.49543	2.4368	237	3.72053	3.673		130.181	0.8727	0.7206	136	1.058	1.3455	96	1.68631	1.8913		257	0.46446	0.6818	247	1.77283	1.3722	247	2.70803	2.6506
	118	0.44559	0.72	138	1.48926	1.6151	138	3.19912	3.0919		148	1.50661	1.7119	138	3.57984	3.0991	138	6.18884	5.6495		228	1.4781	1.429	228	2.51879	2.4416	238	3.77382	3.6627		131.191	0.85624	0.7246	137	1.12573	1.3523	97	1.61912	1.9048		258	0.55668	0.6802	248	1.72104	1.3689	248	2.88555	2.6443
	119	0.29855	0.7254	139	1.49534	1.625	139	3.21197	3.1099		149	1.65217	1.7204	139	3.62114	3.1149	139	6.404	5.6751		229	1.46659	1.4325	229	2.49321	2.4464	239	3.80204	3.6524		132.201	0.85322	0.7285	138	1.16586	1.359	98	1.65149	1.9181		259	0.60294	0.6786	249	1.50953	1.3657	249	2.80289	2.638
	120	0.2299	0.7307	140	1.47926	1.6348	140	3.13604	3.1278		150	1.74216	1.7288	140	3.65231	3.1307	140	6.58302	5.7006		230	1.44789	1.4361	230	2.40883	2.4512	240	3.79948	3.6422		133.211	0.87368	0.7324	139	1.1977	1.3658	99	1.79182	1.9314		260	0.57045	0.6769	250	1.22728	1.3624	250	2.49587	2.6317
	121	0.25363	0.7361	141	1.44617	1.6447	141	3.00785	3.1457		151	1.74623	1.7372	141	3.68105	3.1464	141	6.68041	5.7259		231	1.42275	1.4396	231	2.28228	2.456	241	3.77273	3.632		134.221	0.9109	0.7364	140	1.24532	1.3725	100	1.98992	1.9445		261	0.48225	0.6753	251	0.98323	1.3592	251	2.15302	2.6254
	122	0.34861	0.7415	142	1.40914	1.6545	142	2.89191	3.1635		152	1.66755	1.7456	142	3.71057	3.1621	142	6.67993	5.7511		232	1.38614	1.4431	232	2.15259	2.4607	242	3.73654	3.6218		135.232	0.94505	0.7403	141	1.31734	1.3791	101	2.16136	1.9576		262	0.39344	0.6737	252	0.86624	1.3559	252	1.96771	2.6192
	123	0.47231	0.7468	143	1.38547	1.6642	143	2.8532	3.1813		153	1.54133	1.7539	143	3.73716	3.1776	143	6.60008	5.7761		233	1.33297	1.4467	233	2.06533	2.4654	243	3.70613	3.6117		136.242	0.95525	0.7442	142	1.3999	1.3857	102	2.23179	1.9706		263	0.34858	0.6721	253	0.91127	1.3527	253	2.00292	2.6129
	124	0.58082	0.7521	144	1.38992	1.674	144	2.92641	3.199		154	1.42024	1.7622	144	3.7525	3.1931	144	6.48528	5.8009		234	1.26504	1.4448	234	2.05243	2.4618	244	3.68981	3.6015		137.252	0.93253	0.748	143	1.46661	1.3923	103	2.17584	1.9834		264	0.35622	0.6705	254	1.08255	1.3495	254	2.1715	2.6067
	125	0.64576	0.7574	145	1.42769	1.6837	145	3.09633	3.2166		155	1.35309	1.7705	145	3.74949	3.2085	145	6.38686	5.8256		235	1.19468	1.4407	235	2.11733	2.4549	245	3.68573	3.5914		138.262	0.88587	0.7519	144	1.49778	1.3989	104	2.02791	1.9962		265	0.39631	0.6689	255	1.28657	1.3463	255	2.32851	2.6005
	126	0.66177	0.7628	146	1.49082	1.6934	146	3.29988	3.2342		156	1.366	1.7788	146	3.72791	3.2239	146	6.34244	5.8502		236	1.14207	1.4367	236	2.23293	2.448	246	3.68413	3.5814		139.272	0.83752	0.7557	145	1.49515	1.4054	105	1.85916	2.0089		266	0.44608	0.6673	256	1.41738	1.3431	256	2.38394	2.5943
	127	0.64327	0.7681	147	1.55997	1.7031	147	3.4509	3.2517		157	1.45351	1.787	147	3.69629	3.2391	147	6.36234	5.8746		237	1.12728	1.4326	237	2.35367	2.4411	247	3.67383	3.5713		140.282	0.81056	0.7596	146	1.48184	1.4119	106	1.73547	2.0215		267	0.49713	0.6657	257	1.41454	1.3399	257	2.34545	2.5881
	128	0.61405	0.7733	148	1.61132	1.7128	148	3.47796	3.2692		158	1.58277	1.7951	148	3.66845	3.2543	148	6.42832	5.8988		238	1.16076	1.4286	238	2.43611	2.4343	248	3.649	3.5613		141.292	0.81626	0.7634	147	1.48768	1.4184	107	1.68254	2.034		268	0.54983	0.6642	258	1.29837	1.3367	258	2.27745	2.582
	129	0.59576	0.7786	149	1.62568	1.7224	149	3.35859	3.2866		159	1.70804	1.8033	149	3.65603	3.2694	149	6.50392	5.9229		239	1.23755	1.4246	239	2.4582	2.4275	249	3.61269	3.5513		142.302	0.84863	0.7672	148	1.52985	1.4248	108	1.67935	2.0464		269	0.59595	0.6626	259	1.15512	1.3335	259	2.23417	2.5758
	130	0.60004	0.7839	150	1.59601	1.732	150	3.1335	3.304		160	1.78904	1.8114	150	3.66127	3.2845	150	6.55125	5.9468		240	1.33823	1.4206	240	2.42802	2.4207	250	3.57497	3.5414		143.312	0.88918	0.7709	149	1.60213	1.4312	109	1.6823	2.0587		270	0.61182	0.661	260	1.07833	1.3303	260	2.22922	2.5697
	131	0.62658	0.7892	151	1.53029	1.7416	151	2.89303	3.3213		161	1.80542	1.8195	151	3.67441	3.2995	151	6.54644	5.9706		241	1.4364	1.4166	241	2.37804	2.4139	251	3.54687	3.5315		144.322	0.91839	0.7747	150	1.67987	1.4376	110	1.66247	2.0709		271	0.57321	0.6594	261	1.10644	1.3272	261	2.25141	2.5636
	132	0.66586	0.7944	152	1.44864	1.7512	152	2.74034	3.3386		162	1.76211	1.8275	152	3.67772	3.3144	152	6.48766	5.9942		242	1.50925	1.4127	242	2.34784	2.4071	252	3.53361	3.5216		145.332	0.92678	0.7784	151	1.73715	1.4439	111	1.62999	2.083		272	0.48018	0.6579	262	1.20262	1.324	262	2.28981	2.5575
	133	0.70389	0.7996	153	1.37623	1.7607	153	2.74732	3.3558		163	1.68431	1.8355	153	3.65477	3.3292	153	6.39357	6.0177		243	1.54623	1.4087	243	2.36402	2.4004	253	3.53089	3.5117		146.342	0.91878	0.7822	152	1.76417	1.4502	112	1.62837	2.0951		273	0.3685	0.6563	263	1.29164	1.3208	263	2.33511	2.5514
	134	0.72678	0.8049	154	1.3349	1.7702	154	2.9229	3.373		164	1.60526	1.8435	154	3.60024	3.344	154	6.29411	6.041		244	1.55219	1.4048	244	2.42706	2.3936	254	3.52667	3.5019		147.352	0.90788	0.7859	153	1.77295	1.4564	113	1.70208	2.107		274	0.294	0.6547	264	1.32332	1.3177	264	2.36564	2.5453
	135	0.724	0.8101	155	1.3366	1.7797	155	3.20869	3.3901		165	1.5525	1.8515	155	3.52491	3.3587	155	6.21868	6.0642		245	1.54403	1.4008	245	2.51132	2.3869	255	3.50753	3.492		148.362	0.90666	0.7896	154	1.78719	1.4627	114	1.85949	2.1189		275	0.29857	0.6532	265	1.3103	1.3146	265	2.35099	2.5393
	136	0.69084	0.8153	156	1.38055	1.7892	156	3.50405	3.4072		166	1.53826	1.8594	156	3.45263	3.3733	156	6.1866	6.0872		246	1.54313	1.3969	246	2.57792	2.3802	256	3.46632	3.4823		149.372	0.91861	0.7933	155	1.82316	1.4689	115	2.05718	2.1307		276	0.38272	0.6516	266	1.30896	1.3114	266	2.28332	2.5332
	137	0.63042	0.8205	157	1.45462	1.7987	157	3.70943	3.4242		167	1.55733	1.8673	157	3.41039	3.3879	157	6.20317	6.1101		247	1.567	1.393	247	2.59389	2.3736	257	3.40695	3.4725		150.383	0.93692	0.797	156	1.87493	1.475	116	2.21855	2.1423		277	0.50485	0.6501	267	1.36088	1.3083	267	2.20378	2.5272
	138	0.55487	0.8256	158	1.53973	1.8081	158	3.76816	3.4411		168	1.59244	1.8751	158	3.41602	3.4024	158	6.26121	6.1329		248	1.62349	1.3891	248	2.54822	2.3669	258	3.34342	3.4628		151.393	0.95065	0.8006	157	1.91481	1.4812	117	2.27712	2.1539		278	0.60746	0.6485	268	1.44684	1.3052	268	2.18217	2.5212
	139	0.48431	0.8308	159	1.61551	1.8175	159	3.68774	3.458		169	1.62388	1.883	159	3.46996	3.4168	159	6.34613	6.1555		249	1.70879	1.3852	249	2.45729	2.3603	259	3.29352	3.4531		152.403	0.95348	0.8043	158	1.91	1.4873	118	2.21774	2.1655		279	0.65126	0.647	269	1.4964	1.3021	269	2.2524	2.5152
	140	0.44258	0.836	160	1.66574	1.8269	160	3.53161	3.4749		170	1.63903	1.8908	160	3.5552	3.4311	160	6.44142	6.1779		250	1.80884	1.3813	250	2.35754	2.3537	260	3.27022	3.4434		153.413	0.9489	0.8079	159	1.84557	1.4933	119	2.08904	2.1769		280	0.63424	0.6454	270	1.44857	1.299	270	2.36192	2.5092
	141	0.44969	0.8411	161	1.68225	1.8363	161	3.38654	3.4917		171	1.63746	1.8985	161	3.64567	3.4454	161	6.53259	6.2003		251	1.90255	1.3774	251	2.28923	2.3471	261	3.27526	3.4337		154.423	0.94786	0.8115	160	1.73883	1.4994	120	1.97734	2.1882		281	0.58566	0.6439	271	1.31328	1.2959	271	2.3957	2.5032
	142	0.51362	0.8463	162	1.66656	1.8456	162	3.32182	3.5084		172	1.62998	1.9063	162	3.71847	3.4596	162	6.60871	6.2225		252	1.96601	1.3736	252	2.27935	2.3405	262	3.29814	3.4241		155.433	0.96038	0.8151	161	1.63508	1.5054	121	1.95673	2.1995		282	0.54267	0.6424	272	1.17878	1.2928	272	2.2716	2.4972
	143	0.62507	0.8514	163	1.62914	1.8549	163	3.35997	3.5251		173	1.63244	1.914	163	3.76371	3.4738	163	6.66257	6.2445		253	1.97719	1.3697	253	2.33135	2.3339	263	3.32118	3.4145		156.443	0.98673	0.8187	162	1.58549	1.5114	122	2.04511	2.2107		283	0.52716	0.6408	273	1.15211	1.2897	273	2.02772	2.4913
	144	0.75851	0.8565	164	1.5862	1.8642	164	3.47206	3.5418		174	1.65732	1.9216	164	3.7866	3.4879	164	6.69029	6.2664		254	1.92145	1.3659	254	2.42563	2.3274	264	3.32806	3.4049		157.453	1.01454	0.8223	163	1.61945	1.5173	123	2.1932	2.2218		284	0.53681	0.6393	274	1.27586	1.2867	274	1.81433	2.4854
	145	0.88024	0.8616	165	1.5548	1.8735	165	3.59796	3.5584		175	1.70706	1.9293	165	3.80103	3.5019	165	6.69137	6.2882		255	1.79727	1.3621	255	2.52955	2.3209	265	3.31142	3.3954		158.463	1.02456	0.8258	164	1.727	1.5232	124	2.31364	2.2328		285	0.55312	0.6378	275	1.4866	1.2836	275	1.78152	2.4795
	146	0.96049	0.8667	166	1.54752	1.8827	166	3.67983	3.5749		176	1.77188	1.9369	166	3.81829	3.5158	166	6.66897	6.3098		256	1.62034	1.3582	256	2.61147	2.3144	266	3.27592	3.3859		159.473	1.00208	0.8294	165	1.86178	1.5291	125	2.33295	2.2437		286	0.55818	0.6363	276	1.65061	1.2805	276	1.95252	2.4735
	147	0.98438	0.8718	167	1.56846	1.892	167	3.69102	3.5914		177	1.8331	1.9445	167	3.83783	3.5297	167	6.62988	6.3313		257	1.42334	1.3544	257	2.65202	2.3079	267	3.23525	3.3764		160.483	0.94717	0.8329	166	1.96321	1.535	126	2.23548	2.2546		287	0.54846	0.6348	277	1.65314	1.2775	277	2.19718	2.4677
	148	0.95635	0.8769	168	1.61205	1.9012	168	3.64597	3.6079		178	1.8703	1.952	168	3.84556	3.5435	168	6.58369	6.3527		258	1.24914	1.3506	258	2.64846	2.3014	268	3.20484	3.3669		161.493	0.87726	0.8364	167	1.98559	1.5408	127	2.07341	2.2653		288	0.53747	0.6332	278	1.47637	1.2745	278	2.33748	2.4618
	149	0.89596	0.882	169	1.66538	1.9104	169	3.5874	3.6243		179	1.86931	1.9595	169	3.82137	3.5573	169	6.54094	6.3739		259	1.13799	1.3469	259	2.61153	2.295	269	3.19423	3.3575		162.503	0.81971	0.8399	168	1.91888	1.5466	128	1.93761	2.276		289	0.54596	0.6317	279	1.21052	1.2714	279	2.29805	2.4559
	150	0.82704	0.887	170	1.71325	1.9195	170	3.55919	3.6406		180	1.82773	1.967	170	3.7522	3.571	170	6.51093	6.395		260	1.11244	1.3431	260	2.55795	2.2885	270	3.20277	3.3481		163.513	0.79832	0.8434	169	1.79083	1.5524	129	1.90726	2.2866		290	0.58604	0.6302	280	0.9936	1.2684	280	2.16838	2.4501
	151	0.76589	0.8921	171	1.7439	1.9287	171	3.58048	3.6569		181	1.75587	1.9745	171	3.64347	3.5846	171	6.49993	6.416		261	1.16631	1.3393	261	2.50312	2.2821	271	3.22071	3.3387		164.523	0.82119	0.8469	170	1.65089	1.5581	130	2.00778	2.2972		291	0.64884	0.6287	281	0.92619	1.2654	281	2.11904	2.4442
	152	0.71496	0.8971	172	1.75288	1.9378	172	3.63534	3.6732		182	1.67299	1.9819	172	3.52199	3.5982	172	6.5102	6.4368		262	1.26372	1.3356	262	2.45727	2.2757	272	3.23486	3.3293		165.534	0.87693	0.8503	171	1.5458	1.5638	131	2.20055	2.3076		292	0.70483	0.6272	282	1.02049	1.2624	282	2.24572	2.4384
	153	0.66532	0.9021	173	1.7435	1.9469	173	3.68348	3.6893		183	1.60067	1.9893	173	3.42773	3.6116	173	6.54001	6.4575		263	1.35048	1.3318	263	2.42569	2.2693	273	3.23556	3.32		166.544	0.94128	0.8538	172	1.49981	1.5695	132	2.40809	2.318		293	0.71899	0.6257	283	1.21108	1.2594	283	2.48187	2.4326
	154	0.60655	0.9071	174	1.72386	1.956	174	3.6855	3.7055		184	1.55591	1.9967	174	3.39742	3.6251	174	6.58437	6.4781		264	1.37475	1.3281	264	2.41097	2.263	274	3.22144	3.3107		167.554	0.99013	0.8572	173	1.50847	1.5751	133	2.55802	2.3283		294	0.67325	0.6243	284	1.4077	1.2564	284	2.65872	2.4268
	155	0.53822	0.9121	175	1.7022	1.965	175	3.6283	3.7216		185	1.5467	2.004	175	3.44782	3.6384	175	6.6358	6.4985		265	1.30882	1.3244	265	2.41461	2.2566	275	3.19957	3.3014		168.564	1.0115	0.8606	174	1.54661	1.5807	134	2.61953	2.3385		295	0.58204	0.6228	285	1.5466	1.2534	285	2.65607	2.4211
	156	0.47579	0.9171	176	1.68319	1.9741	176	3.53599	3.7376		186	1.57101	2.0114	176	3.56688	3.6517	176	6.68537	6.5189		266	1.16236	1.3206	266	2.43612	2.2503	276	3.18141	3.2922		169.574	1.00985	0.864	175	1.58401	1.5863	135	2.61297	2.3487		296	0.48843	0.6213	286	1.60931	1.2504	286	2.50392	2.4153
	157	0.44656	0.9221	177	1.66722	1.9831	177	3.45969	3.7536		187	1.6192	2.0186	177	3.71767	3.665	177	6.7238	6.5391		267	0.98033	1.3169	267	2.47049	2.244	277	3.17661	3.2829		170.584	1.0008	0.8674	176	1.60011	1.5919	136	2.59019	2.3587		297	0.44032	0.6198	287	1.60976	1.2474	287	2.3431	2.4095
	158	0.47674	0.9271	178	1.65275	1.9921	178	3.4508	3.7696		188	1.67799	2.0259	178	3.85362	3.6782	178	6.74307	6.5591		268	0.82552	1.3133	268	2.50625	2.2377	278	3.18814	3.2737		171.594	1.00006	0.8708	177	1.59123	1.5974	137	2.60041	2.3687		298	0.4604	0.6183	288	1.57286	1.2444	288	2.28661	2.4038
	159	0.57576	0.9321	179	1.6401	2.001	179	3.53216	3.7855		189	1.73464	2.0331	179	3.93802	3.6913	179	6.73833	6.5791		269	0.7526	1.3096	269	2.52674	2.2314	279	3.21098	3.2646		172.604	1.01343	0.8741	178	1.56916	1.6029	138	2.66295	2.3787		299	0.5301	0.6169	289	1.52312	1.2415	289	2.31742	2.3981
	160	0.72661	0.937	180	1.63398	2.01	180	3.6826	3.8013		190	1.77971	2.0403	180	3.95861	3.7043	180	6.70954	6.5989		270	0.78517	1.3059	270	2.51546	2.2252	280	3.2347	3.2554		173.614	1.0338	0.8775	179	1.55394	1.6084	139	2.76153	2.3885		300	0.59998	0.6154	290	1.48341	1.2385	290	2.3215	2.3924
	161	0.88815	0.9419	181	1.64258	2.0189	181	3.84392	3.8171		191	1.80853	2.0475	181	3.93055	3.7173	181	6.66219	6.6186		271	0.90616	1.3022	271	2.46364	2.2189	281	3.24846	3.2463		174.624	1.04654	0.8808	180	1.56494	1.6138	140	2.86048	2.3983		301	0.6208	0.6139	291	1.47153	1.2356	291	2.22211	2.3867
	162	1.00986	0.9469	182	1.67334	2.0278	182	3.94777	3.8329		192	1.82131	2.0546	182	3.88675	3.7303	182	6.60644	6.6381		272	1.06606	1.2986	272	2.37631	2.2127	282	3.24566	3.2372		175.634	1.03955	0.8841	181	1.6135	1.6193	141	2.92995	2.408		302	0.57461	0.6125	292	1.48972	1.2326	292	2.07966	2.381
	163	1.05282	0.9518	183	1.72741	2.0367	183	3.94905	3.8486		193	1.82281	2.0617	183	3.86086	3.7431	183	6.55473	6.6576		273	1.20528	1.295	273	2.27327	2.2065	283	3.2262	3.2281		176.644	1.01176	0.8875	182	1.69859	1.6247	142	2.96347	2.4176		303	0.48433	0.611	293	1.51668	1.2297	293	2.05053	2.3753
	164	1.00711	0.9567	184	1.79634	2.0456	184	3.84887	3.8643		194	1.82138	2.0688	184	3.87145	3.7559	184	6.5187	6.6769		274	1.28007	1.2913	274	2.18335	2.2003	284	3.19554	3.2191		177.654	0.97489	0.8908	183	1.80608	1.63	143	2.97771	2.4272		304	0.39568	0.6096	294	1.51664	1.2268	294	2.23353	2.3697
	165	0.89706	0.9616	185	1.86337	2.0544	185	3.69527	3.8799		195	1.82729	2.0759	185	3.91496	3.7687	185	6.50661	6.6961		275	1.28018	1.2877	275	2.1338	2.1942	285	3.16154	3.21		178.664	0.94767	0.894	184	1.91196	1.6354	144	2.99628	2.4367		305	0.34527	0.6081	295	1.46525	1.2238	295	2.54729	2.364
	166	0.7714	0.9665	186	1.9096	2.0632	186	3.56081	3.8954		196	1.84997	2.0829	186	3.97015	3.7814	186	6.52197	6.7152		276	1.2301	1.2841	276	2.13911	2.188	286	3.13083	3.201		179.674	0.94586	0.8973	185	1.98959	1.6407	145	3.02955	2.4461		306	0.33813	0.6067	296	1.37351	1.2209	296	2.76413	2.3584
	167	0.68259	0.9714	187	1.92238	2.072	187	3.50818	3.9109		197	1.89455	2.0899	187	4.01087	3.794	187	6.56379	6.7341		277	1.17397	1.2805	277	2.19449	2.1819	287	3.10651	3.1921		180.685	0.97389	0.9006	186	2.01931	1.6459	146	3.06408	2.4555		307	0.35016	0.6052	297	1.28677	1.218	297	2.68636	2.3528
	168	0.6649	0.9763	188	1.90181	2.0808	188	3.56088	3.9264		198	1.95869	2.0969	188	4.01994	3.8065	188	6.62763	6.753		278	1.15203	1.2769	278	2.27717	2.1758	288	3.08796	3.1831		181.695	1.02252	0.9038	187	1.99687	1.6512	147	3.069	2.4648		308	0.35179	0.6038	298	1.25482	1.2151	298	2.31759	2.3472
	169	0.72133	0.9811	189	1.86153	2.0896	189	3.69341	3.9418		199	2.03158	2.1038	189	3.99691	3.8191	189	6.70663	6.7717		279	1.18017	1.2733	279	2.35515	2.1697	289	3.07222	3.1742		182.705	1.07324	0.907	188	1.93653	1.6564	148	3.01573	2.474		309	0.33356	0.6023	299	1.29481	1.2122	299	1.87735	2.3416
	170	0.82499	0.986	190	1.82311	2.0983	190	3.84568	3.9572		200	2.09616	2.1108	190	3.9562	3.8315	190	6.79187	6.7903		280	1.24264	1.2698	280	2.39998	2.1636	290	3.05602	3.1653		183.715	1.1069	0.9102	189	1.86594	1.6616	149	2.8995	2.4831		310	0.31399	0.6009	300	1.37709	1.2094	300	1.64058	2.336
	171	0.93353	0.9908	191	1.80631	2.107	191	3.95385	3.9725		201	2.13473	2.1176	191	3.9175	3.8439	191	6.87226	6.8088		281	1.30091	1.2662	281	2.3977	2.1575	291	3.03717	3.1564		184.725	1.11161	0.9134	190	1.81438	1.6668	150	2.74938	2.4922		311	0.32432	0.5995	301	1.4465	1.2065	301	1.73434	2.3305
	172	1.00891	0.9957	192	1.81998	2.1157	192	3.9821	3.9878		202	2.13606	2.1245	192	3.89435	3.8562	192	6.9351	6.8272		282	1.31401	1.2626	282	2.35363	2.1515	292	3.01508	3.1476		185.735	1.08665	0.9166	191	1.79986	1.6719	151	2.61996	2.5012		312	0.38252	0.598	302	1.46173	1.2036	302	2.0584	2.3249
	173	1.03289	1.0005	193	1.85812	2.1244	193	3.9393	4.003		203	2.10101	2.1313	193	3.88744	3.8685	193	6.96799	6.8454		283	1.25989	1.2591	283	2.28899	2.1455	293	2.99047	3.1388		186.745	1.04125	0.9198	192	1.82203	1.6771	152	2.56752	2.5101		313	0.47629	0.5966	303	1.42081	1.2007	303	2.3858	2.3194
	174	1.01144	1.0053	194	1.90329	2.1331	194	3.87279	4.0182		204	2.0438	2.1382	194	3.88601	3.8807	194	6.96243	6.8636		284	1.14729	1.2556	284	2.23125	2.1394	294	2.96493	3.13		187.755	0.9898	0.923	193	1.865	1.6821	153	2.62264	2.519		314	0.56797	0.5952	304	1.35429	1.1979	304	2.54591	2.3139
	175	0.96713	1.0101	195	1.93555	2.1417	195	3.84279	4.0334		205	1.98751	2.1449	195	3.87606	3.8929	195	6.91779	6.8816		285	1.01266	1.2521	285	2.20253	2.1334	295	2.94086	3.1212		188.765	0.94648	0.9261	194	1.90832	1.6872	154	2.77306	2.5278		315	0.61779	0.5938	305	1.2962	1.195	305	2.53325	2.3084
	176	0.92498	1.0149	196	1.94255	2.1503	196	3.89095	4.0485		206	1.95528	2.1517	196	3.8501	3.905	196	6.8436	6.8995		286	0.90376	1.2486	286	2.21101	2.1275	296	2.92149	3.1124		189.775	0.92136	0.9293	195	1.93927	1.6923	155	2.96664	2.5366		316	0.60928	0.5924	306	1.26036	1.1922	306	2.46549	2.3029
	177	0.89967	1.0197	197	1.92558	2.1589	197	4.0186	4.0635		207	1.96089	2.1584	197	3.81267	3.917	197	6.75833	6.9173		287	0.85833	1.2451	287	2.24869	2.1215	297	2.91071	3.1037		190.785	0.91854	0.9324	196	1.95855	1.6973	156	3.13379	2.5453		317	0.55932	0.591	307	1.24094	1.1893	307	2.45176	2.2974
	178	0.89077	1.0245	198	1.89864	2.1675	198	4.18541	4.0785		208	2.00285	2.1651	198	3.77808	3.929	198	6.68428	6.935		288	0.88788	1.2416	288	2.29586	2.1156	298	2.9123	3.095		191.795	0.9361	0.9355	197	1.97554	1.7023	157	3.21912	2.5539		318	0.50605	0.5895	308	1.23087	1.1865	308	2.50061	2.2919
	179	0.88739	1.0292	199	1.88109	2.176	199	4.32863	4.0935		209	2.06523	2.1718	199	3.76198	3.9409	199	6.64003	6.9526		289	0.97399	1.2381	289	2.32989	2.1096	299	2.9284	3.0863		192.805	0.96693	0.9386	198	1.99661	1.7072	158	3.20662	2.5624		319	0.48294	0.5881	309	1.23575	1.1837	309	2.54125	2.2865
	180	0.87833	1.034	200	1.88792	2.1846	200	4.39286	4.1084		210	2.12497	2.1784	200	3.77157	3.9528	200	6.63375	6.9701		290	1.07795	1.2346	290	2.33457	2.1037	300	2.95801	3.0777		193.815	1.00037	0.9417	199	2.01468	1.7122	159	3.12574	2.5709		320	0.49633	0.5867	310	1.26843	1.1809	310	2.51584	2.281
	181	0.86102	1.0387	201	1.92247	2.1931	201	4.35569	4.1232		211	2.16247	2.1851	201	3.8004	3.9646	201	6.66056	6.9874		291	1.15865	1.2312	291	2.30622	2.0978	301	2.9964	3.0691		194.826	1.02498	0.9448	200	2.00837	1.7171	160	3.03475	2.5794		321	0.52168	0.5853	311	1.3317	1.1781	311	2.43987	2.2756
	182	0.84366	1.0435	202	1.97523	2.2016	202	4.23716	4.138		212	2.17038	2.1917	202	3.83091	3.9763	202	6.70547	7.0047		292	1.18983	1.2277	292	2.25444	2.0919	302	3.03574	3.0605		195.836	1.03231	0.9478	201	1.95282	1.722	161	2.99007	2.5877		322	0.5217	0.584	312	1.40956	1.1753	312	2.37362	2.2702
	183	0.83943	1.0482	203	2.0289	2.21	203	4.08937	4.1528		213	2.15628	2.1982	203	3.84354	3.988	203	6.75071	7.0218		293	1.16907	1.2243	293	2.19781	2.0861	303	3.06733	3.0519		196.846	1.02047	0.9509	202	1.83647	1.7268	162	3.01756	2.596		323	0.47477	0.5826	313	1.47783	1.1725	313	2.34638	2.2648
	184	0.85644	1.0529	204	2.06665	2.2185	204	3.97239	4.1675		214	2.13783	2.2048	204	3.82722	3.9997	204	6.78391	7.0389		294	1.11554	1.2208	294	2.15632	2.0802	304	3.08423	3.0433		197.856	0.99571	0.9539	203	1.67333	1.7317	163	3.10117	2.6043		324	0.39432	0.5812	314	1.52292	1.1697	314	2.32246	2.2594
	185	0.88992	1.0576	205	2.07926	2.2269	205	3.92856	4.1822		215	2.13269	2.2113	205	3.78525	4.0113	205	6.8031	7.0558		295	1.05869	1.2174	295	2.14355	2.0744	305	3.08332	3.0348		198.866	0.97029	0.9569	204	1.50201	1.7365	164	3.1951	2.6125		325	0.32459	0.5798	315	1.54751	1.1669	315	2.24827	2.254
	186	0.9219	1.0623	206	2.06768	2.2353	206	3.96726	4.1969		216	2.14857	2.2178	206	3.73308	4.0228	206	6.81579	7.0726		296	1.02421	1.214	296	2.16146	2.0686	306	3.066	3.0263		199.876	0.9569	0.96	205	1.37071	1.7412	165	3.2521	2.6206		326	0.31328	0.5784	316	1.55589	1.1641	316	2.12784	2.2486
	187	0.92926	1.067	207	2.0404	2.2437	207	4.06613	4.2115		217	2.17839	2.2242	207	3.68923	4.0343	207	6.83272	7.0894		297	1.02389	1.2106	297	2.19953	2.0628	307	3.03714	3.0178		200.886	0.96187	0.963	206	1.31584	1.746	166	3.25127	2.6287		327	0.37828	0.577	317	1.53596	1.1613	317	2.03739	2.2433
	188	0.89608	1.0717	208	2.0079	2.2521	208	4.18618	4.226		218	2.20358	2.2307	208	3.66447	4.0457	208	6.85982	7.106		298	1.05314	1.2072	298	2.23868	2.057	308	3.00314	3.0094		201.896	0.98099	0.9659	207	1.34597	1.7507	167	3.20884	2.6367		328	0.49163	0.5757	318	1.46283	1.1586	318	2.05088	2.2379
	189	0.82343	1.0763	209	1.97764	2.2604	209	4.29182	4.2405		219	2.20398	2.2371	209	3.65569	4.0571	209	6.89282	7.1225		299	1.09606	1.2038	299	2.25861	2.0512	309	2.96992	3.0009		202.906	1.00073	0.9689	208	1.43993	1.7555	168	3.16526	2.6446		329	0.59383	0.5743	319	1.32862	1.1558	319	2.14686	2.2326
	190	0.73098	1.081	210	1.95241	2.2688	210	4.36562	4.255		220	2.16962	2.2435	210	3.64847	4.0684	210	6.91817	7.1389		300	1.13431	1.2004	300	2.24605	2.0455	310	2.94176	2.9925		203.916	1.00496	0.9719	209	1.5592	1.7601	169	3.15691	2.6525		330	0.63079	0.5729	320	1.17219	1.1531	320	2.20001	2.2273
	191	0.64879	1.0856	211	1.93226	2.2771	211	4.41105	4.2694		221	2.10818	2.2498	211	3.62711	4.0797	211	6.92002	7.1552		301	1.15517	1.1971	301	2.20089	2.0398	311	2.92116	2.9841		204.926	0.9842	0.9748	210	1.66669	1.7648	170	3.19055	2.6603		331	0.5886	0.5716	321	1.07347	1.1503	321	2.08664	2.222
	192	0.60337	1.0903	212	1.91813	2.2854	212	4.44396	4.2837		222	2.04399	2.2562	212	3.58673	4.0909	212	6.8898	7.1714		302	1.15543	1.1937	302	2.13748	2.034	312	2.90924	2.9758		205.936	0.94202	0.9778	211	1.74087	1.7695	171	3.23761	2.6681		332	0.50143	0.5702	322	1.10384	1.1476	322	1.8175	2.2167
	193	0.60516	1.0949	213	1.91403	2.2936	213	4.47878	4.2981		223	2.00849	2.2625	213	3.54009	4.1021	213	6.83322	7.1875		303	1.14052	1.1904	303	2.08001	2.0283	313	2.90614	2.9674		206.946	0.89487	0.9807	212	1.77846	1.7741	172	3.25336	2.6758		333	0.4265	0.5688	323	1.26639	1.1448	323	1.56788	2.2114
	194	0.64394	1.0995	214	1.92602	2.3019	214	4.51821	4.3124		224	2.02619	2.2688	214	3.51442	4.1132	214	6.77016	7.2035		304	1.12053	1.187	304	2.05324	2.0227	314	2.91089	2.9591		207.956	0.86442	0.9836	213	1.78683	1.7787	173	3.20948	2.6834		334	0.40433	0.5675	324	1.478	1.1421	324	1.5553	2.2062
	195	0.69466	1.1041	215	1.9584	2.3101	215	4.55187	4.3266		225	2.10283	2.275	215	3.53877	4.1242	215	6.72697	7.2194		305	1.10569	1.1837	305	2.07182	2.017	315	2.92099	2.9508		208.966	0.86627	0.9865	214	1.77373	1.7832	174	3.11889	2.691		335	0.43372	0.5661	325	1.61683	1.1394	325	1.85488	2.2009
	196	0.73063	1.1087	216	2.00963	2.3183	216	4.56428	4.3408		226	2.22129	2.2813	216	3.62776	4.1352	216	6.72455	7.2352		306	1.1032	1.1804	306	2.13272	2.0113	316	2.93239	2.9425		209.977	0.90093	0.9894	215	1.74235	1.7878	175	3.03495	2.6986		336	0.47957	0.5648	326	1.60516	1.1367	326	2.31206	2.1957
	197	0.73715	1.1133	217	2.07084	2.3265	217	4.54693	4.3549		227	2.34738	2.2875	217	3.77036	4.1462	217	6.76823	7.2509		307	1.11582	1.1771	307	2.21441	2.0057	317	2.94021	2.9343		210.987	0.95235	0.9923	216	1.69466	1.7923	176	3.02263	2.7061		337	0.50582	0.5634	327	1.46416	1.134	327	2.64165	2.1904
	198	0.71846	1.1179	218	2.12869	2.3347	218	4.50679	4.369		228	2.44323	2.2937	218	3.93015	4.1571	218	6.84487	7.2665		308	1.14153	1.1738	308	2.28419	2.0001	318	2.94036	2.9261		211.997	0.9953	0.9952	217	1.63866	1.7968	177	3.1175	2.7135		338	0.5063	0.5621	328	1.29619	1.1313	328	2.64384	2.1852
	199	0.69472	1.1225	219	2.17108	2.3428	219	4.46595	4.3831		229	2.48209	2.2998	219	4.05841	4.1679	219	6.92922	7.282		309	1.17344	1.1705	309	2.31113	1.9945	319	2.93134	2.9179		213.007	1.00807	0.998	218	1.59176	1.8013	178	3.29796	2.7209		339	0.50798	0.5608	329	1.20817	1.1286	329	2.36189	2.18
	200	0.69091	1.127	220	2.19279	2.351	220	4.45165	4.3971		230	2.4584	2.306	220	4.11456	4.1787	220	6.99651	7.2974		310	1.2001	1.1672	310	2.27959	1.9889	320	2.9151	2.9097		214.017	0.98395	1.0009	219	1.57539	1.8057	179	3.48964	2.7282		340	0.54465	0.5594	330	1.23675	1.1259	330	2.04752	2.1748
	201	0.72367	1.1316	221	2.1975	2.3591	221	4.48178	4.4111		231	2.38873	2.3121	221	4.08478	4.1894	221	7.03495	7.3127		311	1.20693	1.1639	311	2.19704	1.9833	321	2.89628	2.9015		215.027	0.93521	1.0037	220	1.60287	1.8101	180	3.60209	2.7355		341	0.62319	0.5581	331	1.33266	1.1232	331	1.95891	2.1697
	202	0.79311	1.1361	222	2.19477	2.3672	222	4.55346	4.4251		232	2.3039	2.3182	222	3.98974	4.2001	222	7.05166	7.328		312	1.17977	1.1607	312	2.09229	1.9777	322	2.87998	2.8934		216.037	0.88744	1.0066	221	1.66878	1.8146	181	3.57785	2.7427		342	0.71152	0.5568	332	1.41035	1.1205	332	2.15672	2.1645
	203	0.88351	1.1407	223	2.1936	2.3753	223	4.64111	4.4389		233	2.23607	2.3243	223	3.87748	4.2108	223	7.06859	7.3431		313	1.11031	1.1574	313	2.00398	1.9722	323	2.86905	2.8853		217.047	0.86706	1.0094	222	1.74845	1.8189	182	3.4248	2.7498		343	0.75924	0.5554	333	1.41658	1.1179	333	2.46445	2.1593
	204	0.97192	1.1452	224	2.19638	2.3833	224	4.706	4.4528		234	2.20662	2.3303	224	3.80418	4.2214	224	7.11033	7.3581		314	1.00162	1.1542	314	1.96418	1.9667	324	2.86264	2.8772		218.057	0.88845	1.0122	223	1.80976	1.8233	183	3.21206	2.7569		344	0.73535	0.5541	334	1.36147	1.1152	334	2.62178	2.1542
	205	1.0395	1.1497	225	2.19716	2.3914	225	4.71326	4.4666		235	2.21974	2.3363	225	3.81121	4.2319	225	7.18993	7.373		315	0.8707	1.151	315	1.98414	1.9612	325	2.85688	2.8691		219.067	0.94741	1.015	224	1.83103	1.8276	184	3.031	2.764		345	0.65283	0.5528	335	1.29442	1.1126	335	2.49949	2.1491
	206	1.07941	1.1542	226	2.18568	2.3994	226	4.6485	4.4804		236	2.26349	2.3423	226	3.90859	4.2424	226	7.30023	7.3879		316	0.74585	1.1477	316	2.0492	1.9557	326	2.84756	2.8611		220.077	1.02384	1.0177	225	1.81341	1.832	185	2.94422	2.771		346	0.56062	0.5515	336	1.25585	1.1099	336	2.19923	2.144
	207	1.09727	1.1587	227	2.15521	2.4074	227	4.52631	4.4941		237	2.31674	2.3483	227	4.0717	4.2528	227	7.41523	7.4026		317	0.65813	1.1445	317	2.12535	1.9502	327	2.83346	2.8531		221.087	1.09206	1.0205	226	1.77906	1.8362	186	2.95303	2.7779		347	0.50905	0.5502	337	1.25064	1.1073	337	1.96217	2.1388
	208	1.10473	1.1632	228	2.10947	2.4153	228	4.38613	4.5078		238	2.35835	2.3542	228	4.25218	4.2632	228	7.50139	7.4173		318	0.62995	1.1413	318	2.17486	1.9447	328	2.81816	2.8451		222.097	1.13291	1.0233	227	1.75541	1.8405	187	3.00252	2.7848		348	0.51582	0.5489	338	1.2609	1.1046	338	1.96965	2.1338
	209	1.11066	1.1677	229	2.0642	2.4233	229	4.27722	4.5214		239	2.37429	2.3601	229	4.3976	4.2736	229	7.5332	7.4318		319	0.66524	1.1381	319	2.17363	1.9393	329	2.80891	2.8371		223.107	1.14148	1.026	228	1.75574	1.8448	188	3.02055	2.7917		349	0.55757	0.5476	339	1.27477	1.102	339	2.20118	2.1287
	210	1.11528	1.1722	230	2.04137	2.4313	230	4.23913	4.535		240	2.36055	2.366	230	4.47109	4.2839	230	7.5054	7.4463		320	0.74632	1.1349	320	2.12198	1.9338	330	2.81281	2.8291		224.117	1.12682	1.0287	229	1.76943	1.849	189	2.96602	2.7985		350	0.59159	0.5463	340	1.29641	1.0994	340	2.45831	2.1236
	211	1.11077	1.1766	231	2.05861	2.4392	231	4.2863	4.5486		241	2.32178	2.3719	231	4.46307	4.2941	231	7.43578	7.4607		321	0.83973	1.1317	321	2.04357	1.9284	331	2.83203	2.8212		225.128	1.10461	1.0315	230	1.76962	1.8532	190	2.85627	2.8052		351	0.58873	0.545	341	1.3277	1.0968	341	2.52359	2.1186
	212	1.0874	1.1811	232	2.11922	2.4471	232	4.40349	4.5621		242	2.26746	2.3778	232	4.39111	4.3043	232	7.35714	7.475		322	0.90952	1.1286	322	1.97293	1.923	332	2.86097	2.8133		226.138	1.08728	1.0342	231	1.73429	1.8574	191	2.7568	2.8119		352	0.55201	0.5437	342	1.34691	1.0942	342	2.32007	2.1135
	213	1.04109	1.1855	233	2.20857	2.455	233	4.55358	4.5756		243	2.20814	2.3836	233	4.28975	4.3145	233	7.30251	7.4892		323	0.93263	1.1254	323	1.93763	1.9176	333	2.88731	2.8054		227.148	1.07735	1.0369	232	1.66683	1.8616	192	2.73975	2.8186		353	0.50872	0.5424	343	1.31559	1.0915	343	1.95045	2.1085
	214	0.97707	1.19	234	2.2995	2.4628	234	4.69393	4.589		244	2.15315	2.3894	234	4.19556	4.3246	234	7.29101	7.5033		324	0.90929	1.1222	324	1.9442	1.9122	334	2.89728	2.7976		228.158	1.06719	1.0396	233	1.60099	1.8657	193	2.83709	2.8252		354	0.48523	0.5411	344	1.21561	1.089	344	1.60139	2.1035
	215	0.90726	1.1944	235	2.36452	2.4707	235	4.79379	4.6024		245	2.10997	2.3952	235	4.13423	4.3346	235	7.32087	7.5173		325	0.86361	1.1191	325	1.97493	1.9069	335	2.88272	2.7897		229.168	1.0452	1.0423	234	1.5844	1.8698	194	3.01716	2.8317		355	0.4862	0.5398	345	1.08231	1.0864	345	1.40467	2.0985
	216	0.84263	1.1988	236	2.38867	2.4785	236	4.84504	4.6157		246	2.08443	2.401	236	4.11383	4.3446	236	7.3728	7.5313		326	0.83318	1.116	326	1.99736	1.9015	336	2.84644	2.7819		230.178	1.00435	1.0449	235	1.64886	1.8739	195	3.19905	2.8382		356	0.49385	0.5385	346	0.99628	1.0838	346	1.36643	2.0935
	217	0.78568	1.2032	237	2.37627	2.4863	237	4.86195	4.6291		247	2.08037	2.4067	237	4.1256	4.3546	237	7.42109	7.5451		327	0.85207	1.1128	327	1.98181	1.8962	337	2.80265	2.7741		231.188	0.94845	1.0476	236	1.78554	1.878	196	3.29592	2.8447		357	0.48618	0.5372	347	1.03086	1.0812	347	1.40509	2.0885
	218	0.72836	1.2076	238	2.34778	2.4941	238	4.87088	4.6423		248	2.0987	2.4124	238	4.14988	4.3645	238	7.4466	7.5589		328	0.9346	1.1097	328	1.91793	1.8909	338	2.77143	2.7663		232.198	0.89233	1.0502	237	1.9421	1.882	197	3.26171	2.8511		358	0.45824	0.5359	348	1.19475	1.0786	348	1.44607	2.0835
	219	0.65778	1.212	239	2.32836	2.5019	239	4.89537	4.6556		249	2.13602	2.4181	239	4.1641	4.3743	239	7.4451	7.5725		329	1.06736	1.1066	329	1.82168	1.8856	339	2.76945	2.7586		233.208	0.85597	1.0529	238	2.04615	1.8861	198	3.11432	2.8574		359	0.42907	0.5347	349	1.41792	1.0761	349	1.48455	2.0785
	220	0.56717	1.2164	240	2.33428	2.5096	240	4.94391	4.6687		250	2.1841	2.4238	240	4.14981	4.3842	240	7.42717	7.5861		330	1.21335	1.1035	330	1.7288	1.8803	340	2.80115	2.7508		234.218	0.85538	1.0555	239	2.04352	1.8901	199	2.92345	2.8638		360	0.42862	0.5334	350	1.5948	1.0735	350	1.56894	2.0736
	221	0.46572	1.2207	241	2.3647	2.5174	241	5.00627	4.6819		251	2.23106	2.4294	241	4.09769	4.3939	241	7.41077	7.5996		331	1.32678	1.1004	331	1.6776	1.875	341	2.85507	2.7431		235.228	0.89474	1.0581	240	1.92945	1.8941	200	2.77177	2.87		361	0.474	0.5321	351	1.65145	1.0709	351	1.73279	2.0687
	222	0.38059	1.2251	242	2.40348	2.5251	242	5.05966	4.695		252	2.26423	2.435	242	4.01013	4.4037	242	7.41099	7.613		332	1.37209	1.0973	332	1.68971	1.8698	342	2.90761	2.7354		236.238	0.96364	1.0607	241	1.75393	1.8981	201	2.7127	2.8762		362	0.55253	0.5309	352	1.58533	1.0684	352	1.94478	2.0637
	223	0.34783	1.2295	243	2.42992	2.5328	243	5.08149	4.7081		253	2.27384	2.4406	243	3.90196	4.4133	243	7.43256	7.6264		333	1.33876	1.0942	333	1.75856	1.8645	343	2.93303	2.7278		237.248	1.04076	1.0633	242	1.59709	1.902	202	2.74773	2.8824		363	0.62459	0.5296	353	1.45244	1.0658	353	2.12409	2.0588
	224	0.39547	1.2338	244	2.43241	2.5405	244	5.06207	4.7211		254	2.25596	2.4462	244	3.79863	4.423	244	7.46886	7.6396		334	1.24536	1.0912	334	1.85161	1.8593	344	2.91524	2.7201		238.258	1.10215	1.0659	243	1.528	1.9059	203	2.83292	2.8885		364	0.64625	0.5283	354	1.32089	1.0633	354	2.20658	2.0539
	225	0.52659	1.2381	245	2.41689	2.5481	245	5.01092	4.7341		255	2.21372	2.4518	245	3.73137	4.4326	245	7.50702	7.6528		335	1.13101	1.0881	335	1.9256	1.8541	345	2.85581	2.7125		239.268	1.13053	1.0685	244	1.57003	1.9099	204	2.90741	2.8946		365	0.59795	0.5271	355	1.23226	1.0608	355	2.20168	2.049
	226	0.71196	1.2425	246	2.4048	2.5558	246	4.95329	4.747		256	2.15617	2.4573	246	3.72895	4.4421	246	7.53576	7.6659		336	1.03799	1.0851	336	1.9475	1.8489	346	2.77405	2.7049		240.279	1.1216	1.071	245	1.69238	1.9138	205	2.92588	2.9006		366	0.50037	0.5258	356	1.19586	1.0582	356	2.18811	2.0442
	227	0.89731	1.2468	247	2.4212	2.5634	247	4.91875	4.7599		257	2.09544	2.4628	247	3.80759	4.4516	247	7.55123	7.6789		337	0.99334	1.082	337	1.91062	1.8437	347	2.69885	2.6973		241.289	1.0848	1.0736	246	1.83132	1.9176	206	2.8781	2.9066		367	0.40529	0.5246	357	1.20635	1.0557	357	2.24905	2.0393
	228	1.02383	1.2511	248	2.47934	2.571	248	4.92713	4.7728		258	2.04326	2.4683	248	3.96229	4.461	248	7.55778	7.6918		338	0.99749	1.079	338	1.838	1.8386	348	2.65584	2.6898		242.299	1.03858	1.0761	247	1.92766	1.9215	207	2.78845	2.9126		368	0.36528	0.5233	358	1.25719	1.0532	358	2.3997	2.0344
	229	1.05281	1.2554	249	2.57062	2.5786	249	4.97903	4.7856		259	2.00794	2.4738	249	4.16379	4.4704	249	7.56387	7.7047		339	1.02494	1.076	339	1.77105	1.8334	349	2.65599	2.6822		243.309	1.00234	1.0787	248	1.95789	1.9253	208	2.70004	2.9185		369	0.40075	0.5221	359	1.33607	1.0507	359	2.5677	2.0296
	230	0.98311	1.2597	250	2.66626	2.5862	250	5.05542	4.7984		260	1.99267	2.4792	250	4.36427	4.4798	250	7.57611	7.7174		340	1.03655	1.073	340	1.74911	1.8283	350	2.69086	2.6747		244.319	0.98866	1.0812	249	1.94108	1.9291	209	2.65439	2.9243		370	0.48665	0.5208	360	1.41452	1.0482	360	2.64578	2.0248
	231	0.85241	1.264	251	2.73066	2.5937	251	5.1268	4.8112		261	1.99524	2.4847	251	4.5113	4.4891	251	7.59517	7.7301		341	0.99791	1.0699	341	1.78987	1.8231	351	2.73701	2.6672		245.329	0.99904	1.0837	250	1.91941	1.9329	210	2.67633	2.9302		371	0.56896	0.5196	361	1.4533	1.0457	361	2.57706	2.0199
	232	0.72113	1.2682	252	2.73979	2.6013	252	5.16727	4.8239		262	2.0093	2.4901	252	4.56603	4.4984	252	7.61623	7.7427		342	0.8958	1.067	342	1.88022	1.818	352	2.76728	2.6597		246.339	1.0247	1.0862	251	1.92593	1.9367	211	2.7678	2.9359		372	0.60084	0.5184	362	1.42705	1.0432	362	2.40565	2.0151
	233	0.64597	1.2725	253	2.69481	2.6088	253	5.16678	4.8366		263	2.0265	2.4954	253	4.51845	4.5076	253	7.63323	7.7552		343	0.74551	1.064	343	1.98208	1.8129	353	2.76359	2.6523		247.349	1.05181	1.0887	252	1.96066	1.9404	212	2.90942	2.9417		373	0.57299	0.5171	363	1.34707	1.0407	363	2.24983	2.0103
	234	0.65573	1.2768	254	2.62292	2.6163	254	5.1353	4.8492		264	2.03941	2.5008	254	4.39305	4.5168	254	7.64425	7.7677		344	0.58599	1.061	344	2.05017	1.8078	354	2.72522	2.6448		248.359	1.06856	1.0912	253	1.99002	1.9442	213	3.06663	2.9473		374	0.51658	0.5159	364	1.25754	1.0383	364	2.21518	2.0055
	235	0.74036	1.281	255	2.56428	2.6238	255	5.09711	4.8618		265	2.04417	2.5061	255	4.24136	4.5259	255	7.65424	7.78		345	0.4649	1.058	345	2.05325	1.8028	355	2.66856	2.6374		249.369	1.07056	1.0937	254	1.9694	1.9479	214	3.19921	2.953		375	0.47697	0.5147	365	1.20388	1.0358	365	2.31344	2.0008
	236	0.85835	1.2853	256	2.55145	2.6312	256	5.07804	4.8744		266	2.04229	2.5115	256	4.1235	4.535	256	7.67321	7.7923		346	0.41982	1.055	346	1.98854	1.7977	356	2.61881	2.63		250.379	1.06221	1.0961	255	1.87445	1.9516	215	3.27336	2.9586		376	0.47867	0.5134	366	1.19987	1.0333	366	2.45111	1.996
	237	0.95821	1.2895	257	2.59209	2.6387	257	5.09249	4.8869		267	2.04039	2.5168	257	4.08569	4.5441	257	7.71075	7.8045		347	0.46355	1.0521	347	1.88288	1.7927	357	2.59764	2.6227		251.389	1.05332	1.0986	256	1.72122	1.9553	216	3.27465	2.9642		377	0.50896	0.5122	367	1.22258	1.0309	367	2.49986	1.9913
	238	1.00298	1.2937	258	2.66439	2.6461	258	5.13676	4.8994		268	2.04766	2.522	258	4.14281	4.5531	258	7.77002	7.8167		348	0.57921	1.0491	348	1.78031	1.7877	358	2.6128	2.6153		252.399	1.05293	1.101	257	1.56235	1.9589	217	3.21665	2.9697		378	0.53195	0.511	368	1.23899	1.0284	368	2.39649	1.9865
	239	0.98582	1.2979	259	2.72825	2.6535	259	5.19223	4.9118		269	2.07143	2.5273	259	4.27339	4.5621	259	7.845	7.8287		349	0.72682	1.0462	349	1.72231	1.7827	359	2.65466	2.608		253.409	1.06356	1.1034	258	1.46134	1.9626	218	3.13885	2.9752		379	0.52027	0.5098	369	1.23794	1.026	369	2.19596	1.9818
	240	0.92949	1.3021	260	2.74658	2.6609	260	5.2366	4.9242		270	2.11254	2.5325	260	4.42901	4.571	260	7.92268	7.8407		350	0.85848	1.0433	350	1.73012	1.7777	360	2.70106	2.6007		254.419	1.07922	1.1059	259	1.45956	1.9662	219	3.09112	2.9806		380	0.47742	0.5086	370	1.23749	1.0235	370	2.03494	1.9771
	241	0.87125	1.3063	261	2.70554	2.6683	261	5.25703	4.9366		271	2.16279	2.5377	261	4.55407	4.5799	261	7.98932	7.8526		351	0.93566	1.0403	351	1.79681	1.7727	361	2.7279	2.5934		255.43	1.08835	1.1083	260	1.55496	1.9698	220	3.10949	2.986		381	0.433	0.5074	371	1.26254	1.0211	371	2.033	1.9724
	242	0.84183	1.3105	262	2.62265	2.6756	262	5.25792	4.9489		272	2.20645	2.5429	262	4.60755	4.5887	262	8.03704	7.8644		352	0.94189	1.0374	352	1.89197	1.7677	362	2.72034	2.5861		256.44	1.08044	1.1107	261	1.70378	1.9734	221	3.19528	2.9914		382	0.41675	0.5061	372	1.31679	1.0187	372	2.20651	1.9677
	243	0.85015	1.3147	263	2.53804	2.683	263	5.25891	4.9612		273	2.22593	2.5481	263	4.57759	4.5975	263	8.067	7.8762		353	0.88637	1.0345	353	1.97604	1.7628	363	2.67935	2.5789		257.45	1.05285	1.1131	262	1.84339	1.9769	222	3.31072	2.9967		383	0.4352	0.5049	373	1.37658	1.0162	373	2.4606	1.963
	244	0.88153	1.3189	264	2.493	2.6903	264	5.28385	4.9734		274	2.20985	2.5533	264	4.48343	4.6063	264	8.0871	7.8879		354	0.79773	1.0316	354	2.01689	1.7578	364	2.62067	2.5716		258.46	1.01384	1.1152	263	1.92265	1.98	223	3.39631	3.002		384	0.47101	0.5037	374	1.41125	1.0138	374	2.66237	1.9583
	245	0.90964	1.323	265	2.5073	2.6976	265	5.34658	4.9857		275	2.15992	2.5584	265	4.36473	4.615	265	8.10539	7.8995		355	0.71135	1.0287	355	2.00144	1.7529	365	2.56717	2.5644		259.47	0.97987	1.1119	264	1.92344	1.9742	224	3.40293	3.0072		385	0.50298	0.5025	375	1.40838	1.0114	375	2.73556	1.9536
	246	0.91485	1.3272	266	2.56754	2.7049	266	5.44138	4.9978		276	2.09283	2.5635	266	4.26371	4.6237	266	8.12315	7.911		356	0.6558	1.0258	356	1.93785	1.748	366	2.53822	2.5572		260.48	0.96794	1.1087	265	1.86337	1.9685	225	3.32121	3.0124		386	0.52581	0.5013	376	1.3804	1.009	376	2.70266	1.949
	247	0.8981	1.3313	267	2.63337	2.7121	267	5.54377	5.01		277	2.03528	2.5686	267	4.20828	4.6323	267	8.13201	7.9225		357	0.64371	1.023	357	1.84871	1.7431	367	2.54139	2.5501		261.49	0.98682	1.1055	266	1.78099	1.9628	226	3.19052	3.0176		387	0.55021	0.5001	377	1.35092	1.0066	377	2.64607	1.9444
	248	0.88205	1.3354	268	2.65917	2.7194	268	5.62193	5.0221		278	2.01346	2.5737	268	4.20303	4.6409	268	8.11729	7.9339		358	0.67015	1.0201	358	1.7596	1.7382	368	2.56983	2.5429		262.5	1.03171	1.1022	267	1.71434	1.957	227	3.08042	3.0227		388	0.58397	0.499	378	1.33868	1.0042	378	2.62688	1.9397
	249	0.89864	1.3396	269	2.61984	2.7266	269	5.65305	5.0342		279	2.0412	2.5787	269	4.23105	4.6495	269	8.06655	7.9452		359	0.7181	1.0172	359	1.68873	1.7333	369	2.60635	2.5358		263.51	1.08555	1.099	268	1.68508	1.9514	228	3.05355	3.0278		389	0.61487	0.4978	379	1.3544	1.0018	379	2.63209	1.9351
	250	0.96961	1.3437	270	2.52727	2.7339	270	5.63594	5.0462		280	2.11237	2.5838	270	4.26442	4.658	270	7.9788	7.9565		360	0.76775	1.0144	360	1.64194	1.7285	370	2.63192	2.5287		264.52	1.12651	1.0958	269	1.69546	1.9457	229	3.13061	3.0328		390	0.61581	0.4966	380	1.40438	0.9994	380	2.59368	1.9305
	251	1.09098	1.3478	271	2.42789	2.7411	271	5.5929	5.0582		281	2.2017	2.5888	271	4.2779	4.6665	271	7.8693	7.9677		361	0.80518	1.0115	361	1.61417	1.7236	371	2.63428	2.5216		265.53	1.1383	1.0927	270	1.73614	1.94	230	3.27762	3.0378		391	0.57084	0.4954	381	1.48421	0.997	381	2.46013	1.9259
	252	1.23068	1.3519	272	2.38169	2.7482	272	5.55895	5.0701		282	2.27448	2.5938	272	4.25946	4.6749	272	7.76661	7.9788		362	0.82673	1.0087	362	1.59546	1.7188	372	2.61303	2.5145		266.54	1.11794	1.0895	271	1.79692	1.9344	231	3.42313	3.0428		392	0.49861	0.4942	382	1.56055	0.9947	382	2.25684	1.9213
	253	1.34133	1.356	273	2.43262	2.7554	273	5.56374	5.0821		283	2.3015	2.5987	273	4.21381	4.6833	273	7.70237	7.9898		363	0.83787	1.0059	363	1.57769	1.714	373	2.5789	2.5075		267.55	1.07713	1.0863	272	1.87193	1.9287	232	3.4955	3.0478		393	0.44791	0.493	383	1.5655	0.9923	383	2.0816	1.9168
	254	1.38229	1.3601	274	2.58509	2.7626	274	5.6154	5.0939		284	2.27241	2.6037	274	4.15857	4.6916	274	7.69844	8.0008		364	0.84792	1.0031	364	1.55909	1.7092	374	2.54809	2.5005		268.56	1.03633	1.0831	273	1.95666	1.9231	233	3.45904	3.0527		394	0.46292	0.4919	384	1.42986	0.9899	384	2.03638	1.9122
	255	1.33978	1.3642	275	2.79865	2.7697	275	5.69514	5.1058		285	2.20142	2.6086	275	4.11587	4.6999	275	7.75718	8.0117		365	0.86365	1.0002	365	1.54478	1.7044	375	2.53436	2.4935		269.57	1.01473	1.08	274	2.04055	1.9175	234	3.32886	3.0575		395	0.54431	0.4907	385	1.14685	0.9876	385	2.14901	1.9076
	256	1.23441	1.3682	276	3.00412	2.7768	276	5.76615	5.1176		286	2.12199	2.6135	276	4.10394	4.7082	276	7.85982	8.0225		366	0.88527	0.9974	366	1.54392	1.6996	376	2.54258	2.4865		270.581	1.02113	1.0768	275	2.10295	1.912	235	3.15799	3.0624		396	0.63939	0.4895	386	0.81479	0.9852	386	2.34713	1.9031
	257	1.11209	1.3723	277	3.13371	2.7839	277	5.79268	5.1294		287	2.07269	2.6184	277	4.13198	4.7164	277	7.97372	8.0333		367	0.90639	0.9946	367	1.56523	1.6948	377	2.5666	2.4795		271.591	1.0503	1.0737	276	2.11796	1.9064	236	3.00661	3.0672		397	0.67362	0.4884	387	0.60468	0.9829	387	2.50489	1.8986
	258	1.02259	1.3763	278	3.15076	2.791	278	5.75952	5.1411		288	2.08044	2.6233	278	4.19951	4.7246	278	8.0654	8.044		368	0.9177	0.9919	368	1.61274	1.6901	378	2.59209	2.4725		272.601	1.0863	1.0706	277	2.06756	1.9008	237	2.91287	3.0719		398	0.60227	0.4872	388	0.65363	0.9805	388	2.52746	1.894
	259	0.99662	1.3804	279	3.06507	2.798	279	5.68141	5.1528		289	2.14869	2.6281	279	4.29908	4.7328	279	8.11331	8.0546		369	0.91217	0.9891	369	1.68312	1.6853	379	2.60308	2.4656		273.611	1.11082	1.0675	278	1.95576	1.8953	238	2.88181	3.0766		399	0.44409	0.486	389	0.95726	0.9782	389	2.41101	1.8895
	260	1.03273	1.3844	280	2.92672	2.8051	280	5.5968	5.1645		290	2.25588	2.633	280	4.41983	4.7409	280	8.11468	8.0652		370	0.8889	0.9863	370	1.76528	1.6806	380	2.58933	2.4587		274.621	1.112	1.0644	279	1.81438	1.8898	239	2.89537	3.0813		400	0.2717	0.4849	390	1.35341	0.9759	390	2.2368	1.885
	261	1.10058	1.3885	281	2.8019	2.8121	281	5.54848	5.1761		291	2.36496	2.6378	281	4.54982	4.749	281	8.08382	8.0757		371	0.85381	0.9835	371	1.84219	1.6759	381	2.55128	2.4518		275.631	1.0893	1.0613	280	1.69469	1.8843	240	2.93309	3.086		401	0.16629	0.4837	391	1.62631	0.9736	391	2.10741	1.8806
	262	1.15815	1.3925	282	2.74266	2.8191	282	5.56083	5.1877		292	2.43926	2.6405	282	4.67645	4.757	282	8.04332	8.0862		372	0.81682	0.9808	372	1.89476	1.6712	382	2.50057	2.4449		276.641	1.05261	1.0582	281	1.64684	1.8788	241	2.98702	3.0906		402	0.1694	0.4826	392	1.65885	0.9712	392	2.07381	1.8761
	263	1.17373	1.3965	283	2.76495	2.8261	283	5.62575	5.1993		293	2.45746	2.6321	283	4.78609	4.765	283	8.01281	8.0965		373	0.7873	0.978	373	1.90722	1.6665	383	2.45564	2.4381		277.651	1.01658	1.0551	282	1.69644	1.8734	242	3.06075	3.0952		403	0.26355	0.4814	393	1.51089	0.9689	393	2.10551	1.8716
	264	1.14122	1.4005	284	2.84472	2.8331	284	5.70524	5.2108		294	2.42106	2.6236	284	4.86438	4.773	284	8.0008	8.1068		374	0.77018	0.9753	374	1.87266	1.6619	384	2.43432	2.4313		278.661	0.99374	1.052	283	1.83069	1.8679	243	3.155	3.0997		404	0.39019	0.4803	394	1.35593	0.9666	394	2.12272	1.8672
	265	1.08113	1.4045	285	2.93256	2.8401	285	5.75022	5.2223		295	2.35144	2.6152	285	4.89857	4.7809	285	8.00295	8.1171		375	0.76454	0.9726	375	1.79707	1.6572	385	2.4461	2.4244		279.671	0.9898	1.049	284	2.0019	1.8625	244	3.25318	3.1043		405	0.48741	0.4791	395	1.32746	0.9643	395	2.06408	1.8627
	266	1.02742	1.4085	286	2.9789	2.847	286	5.72656	5.2337		296	2.2787	2.6068	286	4.88158	4.7888	286	8.0069	8.1272		376	0.76554	0.9698	376	1.69959	1.6525	386	2.48734	2.4176		280.681	1.00307	1.0459	285	2.14797	1.8571	245	3.32048	3.1087		406	0.52118	0.478	396	1.40705	0.962	396	1.93842	1.8583
	267	1.00794	1.4124	287	2.95707	2.854	287	5.63489	5.2452		297	2.22791	2.5985	287	4.81608	4.7967	287	8.00054	8.1374		377	0.76813	0.9671	377	1.60788	1.6479	387	2.54165	2.4109		281.691	1.02712	1.0429	286	2.21995	1.8516	246	3.32053	3.1132		407	0.49453	0.4769	397	1.45256	0.9597	397	1.82017	1.8538
	268	1.02914	1.4164	288	2.87364	2.8609	288	5.51343	5.2565		298	2.20939	2.5901	288	4.71636	4.8045	288	7.9791	8.1474		378	0.77063	0.9644	378	1.54931	1.6433	388	2.5854	2.4041		282.701	1.05467	1.0398	287	2.20293	1.8463	247	3.23992	3.1176		408	0.43615	0.4757	398	1.34144	0.9574	398	1.78982	1.8494
	269	1.07334	1.4204	289	2.76265	2.8678	289	5.42142	5.2679		299	2.21678	2.5818	289	4.60633	4.8123	289	7.9478	8.1574		379	0.77601	0.9617	379	1.54061	1.6387	389	2.59668	2.3974		283.711	1.08016	1.0368	288	2.11973	1.8409	248	3.10348	3.122		409	0.38078	0.4746	399	1.09899	0.9552	399	1.86357	1.845
	270	1.10971	1.4243	290	2.66778	2.8747	290	5.41052	5.2792		300	2.23278	2.5735	290	4.51355	4.82	290	7.91898	8.1673		380	0.79022	0.959	380	1.58048	1.6341	390	2.56419	2.3907		284.721	1.10029	1.0338	289	2.0157	1.8355	249	2.96727	3.1263		410	0.35286	0.4735	400	0.8924	0.9529	400	1.96972	1.8406
	271	1.11255	1.4283	291	2.62226	2.8815	291	5.49811	5.2905		301	2.23888	2.5653	291	4.46124	4.8277	291	7.90598	8.1772		381	0.81823	0.9563	381	1.64895	1.6295	391	2.49236	2.384		285.732	1.1131	1.0308	290	1.93348	1.8302	250	2.88989	3.1307		411	0.3587	0.4723	401	0.89073	0.9506	401	1.99814	1.8363
	272	1.07681	1.4322	292	2.63595	2.8884	292	5.65604	5.3017		302	2.22396	2.557	292	4.46109	4.8318	292	7.91688	8.1814		382	0.8601	0.9536	382	1.71472	1.625	392	2.40053	2.3773		286.742	1.11723	1.0278	291	1.89151	1.8249	251	2.89788	3.135		412	0.38792	0.4712	402	1.11351	0.9484	402	1.89104	1.8319
	273	1.02215	1.4361	293	2.6946	2.8952	293	5.821	5.3129		303	2.18796	2.5488	293	4.50963	4.8163	293	7.9514	8.1552		383	0.90894	0.951	383	1.74807	1.6204	393	2.31602	2.3706		287.752	1.11225	1.0248	292	1.87821	1.8196	252	2.96643	3.1392		413	0.42244	0.4701	403	1.40408	0.9461	403	1.70254	1.8275
	274	0.98328	1.4401	294	2.76991	2.902	294	5.92236	5.3241		304	2.1398	2.5407	294	4.58978	4.8008	294	8.00197	8.129		384	0.95221	0.9483	384	1.734	1.6159	394	2.26374	2.364		288.762	1.09977	1.0218	293	1.86445	1.8143	253	3.0294	3.1434		414	0.44868	0.469	404	1.55376	0.9438	404	1.56759	1.8232
	275	0.99161	1.444	295	2.83403	2.9088	295	5.91446	5.3353		305	2.09169	2.5325	295	4.67669	4.7854	295	8.05774	8.1029		385	0.97589	0.9456	385	1.67927	1.6113	395	2.25646	2.3573		289.772	1.08394	1.0189	294	1.82641	1.809	254	3.01553	3.1476		415	0.46564	0.4679	405	1.46912	0.9416	405	1.58927	1.8188
	276	1.05811	1.4479	296	2.87115	2.9156	296	5.79804	5.3464		306	2.05321	2.5244	296	4.74582	4.7701	296	8.10913	8.0769		386	0.96974	0.943	386	1.60962	1.6068	396	2.28988	2.3507		290.782	1.07019	1.0159	295	1.7646	1.8037	255	2.89136	3.1518		416	0.48246	0.4667	406	1.23771	0.9394	406	1.72753	1.8145
	277	1.16623	1.4518	297	2.88128	2.9224	297	5.62078	5.3574		307	2.02799	2.5163	297	4.78006	4.7548	297	8.15042	8.051		387	0.93151	0.9404	387	1.5578	1.6023	397	2.34471	2.3441		291.792	1.0622	1.0129	296	1.70697	1.7985	256	2.68588	3.1559		417	0.5065	0.4656	407	1.04099	0.9371	407	1.7891	1.8102
	278	1.27881	1.4557	298	2.87611	2.9291	298	5.4565	5.3685		308	2.01387	2.5082	298	4.77347	4.7395	298	8.17944	8.0252		388	0.86828	0.9377	388	1.54785	1.5978	398	2.39487	2.3376		292.802	1.05872	1.01	297	1.69352	1.7932	257	2.48133	3.16		418	0.53198	0.4645	408	0.99932	0.9349	408	1.55011	1.8059
	279	1.35514	1.4595	299	2.87065	2.9359	299	5.37304	5.3795		309	2.00539	2.5002	299	4.73079	4.7243	299	8.19521	7.9994		389	0.7943	0.9351	389	1.58313	1.5933	399	2.41841	2.331		293.812	1.05261	1.0071	298	1.75095	1.788	258	2.37293	3.1641		419	0.54124	0.4634	409	1.08851	0.9327	409	0.9349	1.8016
	280	1.36952	1.4634	300	2.87554	2.9426	300	5.40344	5.3905		310	1.99684	2.4922	300	4.66349	4.7092	300	8.19547	7.9738		390	0.72648	0.9325	390	1.64421	1.5889	400	2.4064	2.3245		294.822	1.03346	1.0041	299	1.87281	1.7828	259	2.41873	3.1682		420	0.52031	0.4623	410	1.19327	0.9304
	281	1.32198	1.4673	301	2.89363	2.9466	301	5.53339	5.3968		311	1.98425	2.4842	301	4.58464	4.6941	301	8.17607	7.9482		391	0.67895	0.9299	391	1.69811	1.5844	401	2.36579	2.318		295.832	0.9932	1.0012	300	2.01748	1.7776	260	2.60657	3.1722		421	0.4758	0.4612	411	1.23298	0.9282
	282	1.23627	1.4711	302	2.92114	2.9416	302	5.70961	5.3876		312	1.96623	2.4762	302	4.50486	4.679	302	8.13281	7.9227		392	0.65883	0.9272	392	1.71468	1.58	402	2.31524	2.3115		296.842	0.93193	0.9983	301	2.1268	1.7725	261	2.85654	3.1761		422	0.43554	0.4601	412	1.23292	0.926
	283	1.14705	1.475	303	2.95154	2.9365	303	5.86421	5.3784		313	1.94428	2.4682	303	4.43078	4.664	303	8.06479	7.8973		393	0.6643	0.9246	393	1.68202	1.5755	403	2.27592	2.305		297.852	0.8606	0.9954	302	2.15522	1.7673	262	3.05841	3.1801		423	0.4284	0.459	413	1.27549	0.9238
	284	1.08345	1.4788	304	2.97898	2.9315	304	5.94315	5.3692		314	1.92303	2.4603	304	4.36603	4.649	304	7.97726	7.872		394	0.68552	0.9221	394	1.61308	1.5711	404	2.26168	2.2985		298.862	0.79831	0.9925	303	2.09323	1.7622	263	3.12455	3.1833		424	0.45871	0.4579	414	1.3881	0.9216
	285	1.0576	1.4827	305	2.99966	2.9265	305	5.92614	5.36		315	1.91034	2.4524	305	4.31333	4.6341	305	7.88201	7.8467		395	0.70777	0.9195	395	1.53994	1.5667	405	2.27326	2.2921		299.872	0.7649	0.9896	304	1.97144	1.757	264	3.03105	3.1741		425	0.49922	0.4568	415	1.48789	0.9194
	286	1.06337	1.4865	306	3.01124	2.9215	306	5.8304	5.3508		316	1.91601	2.4446	306	4.27586	4.6193	306	7.79448	7.8215		396	0.71587	0.9169	396	1.4982	1.5623	406	2.29896	2.2857		300.883	0.77202	0.9867	305	1.84313	1.7519	265	2.82663	3.1648		426	0.51228	0.4558	416	1.44644	0.9172
	287	1.08472	1.4903	307	3.01191	2.9165	307	5.69864	5.3417		317	1.94846	2.4367	307	4.25666	4.6044	307	7.72852	7.7964		397	0.6987	0.9143	397	1.50918	1.558	407	2.32131	2.2793		301.893	0.81721	0.9838	306	1.75554	1.7468	266	2.60589	3.1556		427	0.48256	0.4547	417	1.21666	0.9151
	288	1.10785	1.4941	308	3.00052	2.9115	308	5.57868	5.3325		318	2.00946	2.4289	308	4.25614	4.5897	308	7.69108	7.7714		398	0.65275	0.9118	398	1.56903	1.5536	408	2.32598	2.2729		302.903	0.88407	0.981	307	1.72655	1.7418	267	2.46208	3.1464		428	0.43136	0.4536	418	0.89769	0.9129
	289	1.12961	1.4979	309	2.97827	2.9065	309	5.50458	5.3234		319	2.08954	2.4211	309	4.26927	4.5749	309	7.67924	7.7465		399	0.58366	0.9092	399	1.6502	1.5492	409	2.30867	2.2665		303.913	0.94865	0.9781	308	1.73997	1.7367	268	2.44428	3.1373		429	0.39689	0.4525	419	0.66804	0.9107
	290	1.15757	1.5017	310	2.95046	2.9016	310	5.48685	5.3143		320	2.1669	2.4134	310	4.28449	4.5603	310	7.68124	7.7217		400	0.5054	0.9067	400	1.71479	1.5449	410	2.27646	2.2602		304.923	0.98918	0.9753	309	1.76072	1.7316	269	2.53981	3.1282		430	0.39683	0.4514	420	0.64191	0.9085
	291	1.20208	1.5055	311	2.92645	2.8966	311	5.51389	5.3052		321	2.21234	2.4056	311	4.28601	4.5456	311	7.6812	7.6969		401	0.43693	0.9041	401	1.73301	1.5406	411	2.24335	2.2538		305.933	0.99458	0.9724	310	1.75936	1.7266	270	2.68874	3.1191		431	0.40874	0.4504	421	0.77877	0.9064
	292	1.26559	1.5093	312	2.91684	2.8916	312	5.56136	5.2962		322	2.19976	2.3979	312	4.25949	4.5311	312	7.66573	7.6722		402	0.3971	0.9016	402	1.69744	1.5362	412	2.22257	2.2475		306.943	0.96784	0.9696	311	1.73013	1.7216	271	2.8203	3.11		432	0.39019	0.4493	422	0.92857	0.9042
	293	1.33629	1.5131	313	2.92854	2.8867	313	5.60353	5.2871		323	2.11822	2.3902	313	4.19893	4.5165	313	7.62958	7.6476		403	0.39926	0.8991	403	1.62603	1.5319	413	2.21988	2.2412		307.953	0.92328	0.9668	312	1.69175	1.7166	272	2.8904	3.1009		433	0.32355	0.4482	423	0.96923	0.9021
	294	1.39055	1.5168	314	2.96036	2.8818	314	5.6215	5.2781		324	1.97984	2.3825	314	4.1118	4.502	314	7.57783	7.623		404	0.44713	0.8965	404	1.55222	1.5276	414	2.2314	2.2349		308.963	0.87935	0.964	313	1.67177	1.7116	273	2.90064	3.0919		434	0.24341	0.4471	424	0.9075	0.8999
	295	1.40348	1.5206	315	3.00156	2.8768	315	5.60626	5.269		325	1.81849	2.3749	315	4.01904	4.4876	315	7.52358	7.5986		405	0.5336	0.894	405	1.50767	1.5234	415	2.24692	2.2287		309.973	0.85089	0.9612	314	1.68614	1.7066	274	2.89015	3.0829		435	0.21583	0.4461	425	0.85207	0.8978
	296	1.3624	1.5243	316	3.03516	2.8719	316	5.55793	5.26		326	1.67828	2.3673	316	3.94912	4.4732	316	7.48207	7.5742		406	0.64285	0.8915	406	1.50644	1.5191	416	2.25672	2.2224		310.983	0.84425	0.9584	315	1.7283	1.7016	275	2.90674	3.0739		436	0.28153	0.445	426	0.89099	0.8956
	297	1.27557	1.5281	317	3.0447	2.867	317	5.48367	5.251		327	1.59575	2.3597	317	3.92741	4.4589	317	7.46364	7.5499		407	0.75499	0.889	407	1.53885	1.5148	417	2.25782	2.2162		311.993	0.85693	0.9556	316	1.77498	1.6967	276	2.97451	3.065		437	0.41161	0.444	427	0.99637	0.8935
	298	1.1712	1.5318	318	3.02156	2.8621	318	5.39624	5.242		328	1.58393	2.3521	318	3.96526	4.4445	318	7.46872	7.5257		408	0.85148	0.8865	408	1.57804	1.5106	418	2.25619	2.21		313.003	0.88089	0.9528	317	1.80416	1.6917	277	3.07627	3.0561		438	0.51936	0.4429	428	1.05116	0.8914
	299	1.08645	1.5355	319	2.96925	2.8572	319	5.31291	5.2331		329	1.62623	2.3446	319	4.05334	4.4303	319	7.48707	7.5016		409	0.91905	0.884	409	1.59568	1.5064	419	2.26333	2.2038		314.013	0.90714	0.95	318	1.81198	1.6868	278	3.16043	3.0472		439	0.52515	0.4418	429	0.97184	0.8893
	300	1.05149	1.5392	320	2.90232	2.8523	320	5.25312	5.2241		330	1.68401	2.337	320	4.16291	4.4161	320	7.50182	7.4775		410	0.95089	0.8816	410	1.57827	1.5021	420	2.28906	2.1976		315.023	0.92913	0.9473	319	1.81589	1.6819	279	3.16848	3.0383		440	0.42288	0.4408	430	0.8053	0.8871
	301	1.07638	1.5415	321	2.84041	2.8474	321	5.23366	5.2152		331	1.71526	2.3295	321	4.25519	4.4019	321	7.49671	7.4535		411	0.94532	0.8791	411	1.53551	1.4979	421	2.3344	2.1914		316.034	0.94379	0.9445	320	1.84091	1.677	280	3.06816	3.0295		441	0.29022	0.4397	431	0.70003	0.885
	302	1.14719	1.5389	322	2.80015	2.8426	322	5.26217	5.2063		332	1.69562	2.3221	322	4.29563	4.3878	322	7.46341	7.4296		412	0.90327	0.8766	412	1.49609	1.4937	422	2.38856	2.1853		317.044	0.95051	0.9418	321	1.89819	1.6721	281	2.87432	3.0207		442	0.22988	0.4387	432	0.77207	0.8829
	303	1.23305	1.5362	323	2.78873	2.8377	323	5.33176	5.1974		333	1.63131	2.3146	323	4.2672	4.3737	323	7.40565	7.4058		413	0.82686	0.8742	413	1.49299	1.4895	423	2.43205	2.1792		318.054	0.94958	0.939	322	1.97104	1.6673	282	2.64617	3.0119		443	0.28801	0.4377	433	0.98955	0.8808
	304	1.30053	1.5336	324	2.80203	2.8329	324	5.42054	5.1885		334	1.55681	2.3072	324	4.17727	4.3597	324	7.33808	7.382		414	0.72027	0.8717	414	1.54574	1.4854	424	2.44484	2.1731		319.064	0.94144	0.9363	323	2.01956	1.6624	283	2.46196	3.0031		444	0.4173	0.4366	434	1.18687	0.8787
	305	1.32844	1.531	325	2.82761	2.828	325	5.49779	5.1796		335	1.51784	2.2998	325	4.05487	4.3457	325	7.28028	7.3583		415	0.59252	0.8693	415	1.64876	1.4812	425	2.41555	2.167		320.074	0.92713	0.9336	324	2.00291	1.6576	284	2.38375	2.9944		445	0.51624	0.4356	435	1.20034	0.8766
	306	1.316	1.5284	326	2.85082	2.8232	326	5.53521	5.1708		336	1.54738	2.2924	326	3.93945	4.3318	326	7.24826	7.3347		416	0.45995	0.8668	416	1.77173	1.4771	426	2.34734	2.1609		321.084	0.90929	0.9309	325	1.90571	1.6528	285	2.42992	2.9857		446	0.51221	0.4345	436	1.00334	0.8745
	307	1.28134	1.5258	327	2.86078	2.8184	327	5.51864	5.1619		337	1.64689	2.2851	327	3.86581	4.3179	327	7.2474	7.3112		417	0.34589	0.8644	417	1.87191	1.4729	427	2.2573	2.1548		322.094	0.89267	0.9282	326	1.75138	1.6479	286	2.56865	2.977		447	0.41944	0.4335	437	0.71866	0.8725
	308	1.25162	1.5231	328	2.85375	2.8135	328	5.45434	5.1531		338	1.78251	2.2777	328	3.85145	4.304	328	7.27004	7.2877		418	0.27568	0.862	418	1.91249	1.4688	428	2.16982	2.1488		323.104	0.88327	0.9255	327	1.59273	1.6432	287	2.73472	2.9683		448	0.32434	0.4325	438	0.49944	0.8704
	309	1.25021	1.5205	329	2.83292	2.8087	329	5.36631	5.1443		339	1.89906	2.2704	329	3.89142	4.2902	329	7.2989	7.2644		419	0.26804	0.8596	419	1.87814	1.4647	429	2.10666	2.1428		324.114	0.88622	0.9228	328	1.48439	1.6384	288	2.86041	2.9597		449	0.31136	0.4314
	310	1.28683	1.5179	330	2.8057	2.8039	330	5.2855	5.1355		340	1.94535	2.2631	330	3.96226	4.2764	330	7.31493	7.2411		420	0.32608	0.8572	420	1.78081	1.4606	430	2.07863	2.1368		325.124	0.90324	0.9201	329	1.45369	1.6336	289	2.90466	2.9511		450	0.3914	0.4304
	311	1.3546	1.5153	331	2.78043	2.7991	331	5.236	5.1267		341	1.89871	2.2559	331	4.03273	4.2627	331	7.30576	7.2178		421	0.43255	0.8548	421	1.65352	1.4565	431	2.08233	2.1308		326.134	0.93098	0.9174	330	1.48799	1.6289	290	2.86686	2.9425		451	0.49043	0.4294
	312	1.43412	1.5128	332	2.76406	2.7943	332	5.22512	5.1179		342	1.77648	2.2487	332	4.07611	4.2491	332	7.27086	7.1947		422	0.55282	0.8524	422	1.53588	1.4524	432	2.10333	2.1248		327.144	0.96109	0.9147	331	1.54617	1.6241	291	2.78026	2.9339		452	0.50572	0.4284
	313	1.50157	1.5102	333	2.76126	2.7896	333	5.24224	5.1092		343	1.62855	2.2414	333	4.07903	4.2354	333	7.22072	7.1716		423	0.64578	0.85	423	1.45843	1.4483	433	2.12359	2.1189		328.154	0.98239	0.9121	332	1.58664	1.6194	292	2.69087	2.9254		453	0.38347	0.4273
	314	1.5367	1.5076	334	2.77408	2.7848	334	5.26695	5.1005		344	1.51452	2.2342	334	4.04365	4.2218	334	7.17051	7.1486		424	0.67911	0.8476	424	1.4328	1.4443	434	2.12975	2.1129		329.164	0.98438	0.9094	333	1.59356	1.6147	293	2.63398	2.9169
	315	1.52768	1.505	335	2.80126	2.78	335	5.28159	5.0917		345	1.47669	2.2271	335	3.98368	4.2083	335	7.13147	7.1257		425	0.64233	0.8452	425	1.45097	1.4402	435	2.1182	2.107		330.175	0.96121	0.9068	334	1.58425	1.61	294	2.62048	2.9084
	316	1.47224	1.5024	336	2.837	2.7753	336	5.28125	5.083		346	1.522	2.2199	336	3.91701	4.1948	336	7.10442	7.1028		426	0.5518	0.8428	426	1.49261	1.4362	436	2.09525	2.1011		331.185	0.91449	0.9041	335	1.59343	1.6053	295	2.63814	2.8999
	317	1.37639	1.4999	337	2.87031	2.7705	337	5.27564	5.0743		347	1.62148	2.2128	337	3.8592	4.1813	337	7.07908	7.08		427	0.44452	0.8405	427	1.53554	1.4321	437	2.07289	2.0952		332.195	0.85383	0.9015	336	1.64524	1.6006	296	2.66441	2.8915
	318	1.25255	1.4973	338	2.88636	2.7658	338	5.2818	5.0657		348	1.72664	2.2057	338	3.8201	4.1679	338	7.03962	7.0573		428	0.36291	0.8381	428	1.56418	1.4281	438	2.06261	2.0893		333.205	0.79464	0.8989	337	1.73237	1.596	297	2.68153	2.8831
	319	1.11813	1.4947	339	2.87081	2.7611	339	5.31213	5.057		349	1.79398	2.1986	339	3.80412	4.1546	339	6.97377	7.0347		429	0.33709	0.8358	429	1.57282	1.4241	439	2.07034	2.0835		334.215	0.75339	0.8963	338	1.81696	1.5913	298	2.68488	2.8747
	320	0.99399	1.4922	340	2.81618	2.7563	340	5.36489	5.0483		350	1.8048	2.1916	340	3.81223	4.1412	340	6.88085	7.0121		430	0.37255	0.8334	430	1.56392	1.4201	440	2.09457	2.0776		335.225	0.74174	0.8937	339	1.85358	1.5867	299	2.6808	2.8663
	321	0.90155	1.4896	341	2.72757	2.7516	341	5.42295	5.0397		351	1.7708	2.1846	341	3.84336	4.1279	341	6.77407	6.9896		431	0.44896	0.8311	431	1.54408	1.4162	441	2.12766	2.0718		336.235	0.7617	0.8911	340	1.81949	1.5821	300	2.67705	2.858
	322	0.85796	1.4871	342	2.62428	2.7469	342	5.46218	5.0311		352	1.7235	2.1775	342	3.89398	4.1147	342	6.6757	6.9672		432	0.53065	0.8288	432	1.52066	1.4122	442	2.15931	2.066		337.245	0.80411	0.8885	341	1.7321	1.5775	301	2.67338	2.8497
	323	0.87032	1.4845	343	2.53536	2.7422	343	5.46477	5.0225		353	1.69449	2.1706	343	3.95642	4.1015	343	6.6071	6.9448		433	0.58384	0.8265	433	1.50066	1.4082	443	2.18018	2.0602		338.255	0.85142	0.8859	342	1.64134	1.5729	302	2.65908	2.8414
	324	0.93163	1.482	344	2.48958	2.7375	344	5.43002	5.0139		354	1.69752	2.1636	344	4.018	4.0883	344	6.57874	6.9226		434	0.59238	0.8241	434	1.49088	1.4043	444	2.18434	2.0544		339.265	0.88433	0.8833	343	1.6008	1.5683	303	2.61939	2.8331
	325	1.02115	1.4795	345	2.50364	2.7329	345	5.37588	5.0053		355	1.72245	2.1567	345	4.06287	4.0752	345	6.58521	6.9004		435	0.56435	0.8218	435	1.49756	1.4003	445	2.17018	2.0487		340.275	0.88966	0.8807	344	1.63527	1.5637	304	2.54656	2.8249
	326	1.11031	1.4769	346	2.57373	2.7282	346	5.32989	4.9968		356	1.74362	2.1497	346	4.07682	4.0622	346	6.60817	6.8782		436	0.52667	0.8195	436	1.52406	1.3964	446	2.14029	2.0429		341.285	0.86593	0.8782	345	1.72532	1.5592	305	2.4484	2.8167
	327	1.17254	1.4744	347	2.67493	2.7235	347	5.31396	4.9882		357	1.73733	2.1428	347	4.05312	4.0491	347	6.62582	6.8562		437	0.51025	0.8172	437	1.56727	1.3925	447	2.10088	2.0372		342.295	0.82386	0.8756	346	1.81885	1.5547	306	2.34806	2.8085
	328	1.19303	1.4719	348	2.76932	2.7189	348	5.33152	4.9797		358	1.69795	2.136	348	3.99629	4.0361	348	6.62397	6.8342		438	0.5334	0.8149	438	1.61512	1.3886	448	2.06082	2.0315		343.305	0.78124	0.8731	347	1.86272	1.5501	307	2.27444	2.8003
	329	1.17381	1.4694	349	2.82	2.7142	349	5.36444	4.9712		359	1.64323	2.1291	349	3.92131	4.0232	349	6.6029	6.8122		439	0.59163	0.8126	439	1.64834	1.3847	449	2.03027	2.0258		344.315	0.75437	0.8705	348	1.83492	1.5456	308	2.24786	2.7922
	330	1.13159	1.4669	350	2.80527	2.7096	350	5.38221	4.9627		360	1.60551	2.1223	350	3.84791	4.0103	350	6.57636	6.7904		440	0.65909	0.8104	440	1.6472	1.3808	450	2.01823	2.0201		345.325	0.75034	0.868	349	1.75742	1.5411	309	2.26926	2.784
	331	1.08902	1.4644	351	2.72669	2.7049	351	5.35881	4.9542		361	1.61349	2.1155	351	3.79259	3.9974	351	6.56293	6.7686		441	0.7008	0.8081	441	1.60139	1.377	451	2.02947	2.0145		346.336	0.76411	0.8655	350	1.68206	1.5366	310	2.31909	2.7759
	332	1.06366	1.4619	352	2.60778	2.7003	352	5.28827	4.9457		362	1.67494	2.1087	352	3.76246	3.9846	352	6.57469	6.7469		442	0.6898	0.8058	442	1.51812	1.3731	452	2.06179	2.0088		347.346	0.78188	0.863	351	1.65837	1.5322	311	2.36713	2.7679
	333	1.05994	1.4594	353	2.48402	2.6957	353	5.19002	4.9373		363	1.77012	2.1019	353	3.75416	3.9718	353	6.60916	6.7252		443	0.62066	0.8036	443	1.42356	1.3693	453	2.10523	2.0032		348.356	0.78914	0.8604	352	1.70322	1.5277	312	2.38814	2.7598
	334	1.06824	1.4569	354	2.38884	2.6911	354	5.10039	4.9288		364	1.85996	2.0952	354	3.75862	3.9591	354	6.6494	6.7037		444	0.51286	0.8013	444	1.35517	1.3654	454	2.14436	1.9976		349.366	0.77888	0.8579	353	1.79057	1.5233	313	2.37494	2.7518
	335	1.07143	1.4544	355	2.34163	2.6865	355	5.05423	4.9204		365	1.9051	2.0885	355	3.76879	3.9464	355	6.6725	6.6822		445	0.40244	0.7991	445	1.3469	1.3616	455	2.16353	1.992		350.376	0.75545	0.8554	354	1.86677	1.5188	314	2.34162	2.7438
	336	1.05548	1.4519	356	2.34258	2.6819	356	5.06599	4.912		366	1.88573	2.0818	356	3.78565	3.9337	356	6.6621	6.6607		446	0.32613	0.7968	446	1.41361	1.3578	456	2.15314	1.9864		351.386	0.73197	0.853	355	1.88157	1.5144	315	2.31524	2.7358
	337	1.01838	1.4494	357	2.37585	2.6773	357	5.12072	4.9036		367	1.81157	2.0751	357	3.81829	3.9211	357	6.61812	6.6394		447	0.30543	0.7946	447	1.54195	1.354	457	2.11432	1.9808		352.396	0.72266	0.8505	356	1.81598	1.51	316	2.32046	2.7278
	338	0.97273	1.4469	358	2.41839	2.6727	358	5.18021	4.8952		368	1.71672	2.0684	358	3.87762	3.9085	358	6.5582	6.6181		448	0.33814	0.7924	448	1.69302	1.3502	458	2.05933	1.9753		353.406	0.73457	0.848	357	1.69131	1.5056	317	2.36593	2.7199
	339	0.94029	1.4444	359	2.45004	2.6682	359	5.20176	4.8868		369	1.64199	2.0618	359	3.96656	3.896	359	6.5095	6.5968		449	0.4009	0.7902	449	1.81655	1.3464	459	2.007	1.9697		354.416	0.76341	0.8455	358	1.55564	1.5012	318	2.43991	2.712
	340	0.94113	1.442	360	2.46023	2.6636	360	5.16021	4.8785		370	1.61406	2.0552	360	4.07292	3.8835	360	6.49475	6.5757		450	0.4608	0.7879	450	1.87086	1.3426	460	1.97496	1.9642		355.426	0.79589	0.8431	359	1.45718	1.4969	319	2.51772	2.7041
	341	0.98295	1.4395	361	2.44924	2.659	361	5.06171	4.8701		371	1.63242	2.0486	361	4.16991	3.871	361	6.51994	6.5546		451	0.49042	0.7857	451	1.83986	1.3388	461	1.97188	1.9587		356.436	0.81717	0.8406	360	1.42085	1.4925	320	2.57643	2.6962
	342	1.05581	1.437	362	2.42481	2.6545	362	4.94206	4.8618		372	1.67081	2.042	362	4.22565	3.8586	362	6.57033	6.5336		452	0.47925	0.7835	452	1.73923	1.3351	462	1.99352	1.9532		357.446	0.81913	0.8382	361	1.44027	1.4882	321	2.60788	2.6884
	343	1.13522	1.4346	363	2.3968	2.65	363	4.84993	4.8535		373	1.69204	2.0355	363	4.21793	3.8462	363	6.61725	6.5126		453	0.43675	0.7813	453	1.60892	1.3314	463	2.02456	1.9477		358.456	0.80447	0.8357	362	1.48759	1.4839	322	2.6222	2.6805
	344	1.19215	1.4321	364	2.37301	2.6454	364	4.82357	4.8452		374	1.6683	2.0289	364	4.14672	3.8339	364	6.63262	6.4917		454	0.38662	0.7791	454	1.49548	1.3276	464	2.0456	1.9423		359.466	0.78451	0.8333	363	1.53258	1.4795	323	2.63954	2.6727
	345	1.20523	1.4297	365	2.35787	2.6409	365	4.87267	4.8369		375	1.59597	2.0224	365	4.03745	3.8216	365	6.60373	6.4709		455	0.35581	0.777	455	1.43224	1.3239	465	2.042	1.9368		360.477	0.77196	0.8309	364	1.55889	1.4752	324	2.67519	2.665
	346	1.16958	1.4272	366	2.35338	2.6364	366	4.97445	4.8286		376	1.49752	2.0159	366	3.93187	3.8093	366	6.54035	6.4501		456	0.36351	0.7748	456	1.42645	1.3202	466	2.01062	1.9314		361.487	0.77319	0.8285	365	1.56868	1.4709	325	2.72766	2.6572
	347	1.09832	1.4248	367	2.36072	2.6319	367	5.08578	4.8204		377	1.40981	2.0095	367	3.87006	3.7971	367	6.47031	6.4294		457	0.41459	0.7726	457	1.45872	1.3165	467	1.96106	1.926		362.497	0.78445	0.826	366	1.57528	1.4667	326	2.77782	2.6495
	348	1.01631	1.4224	368	2.38054	2.6274	368	5.16451	4.8121		378	1.36525	2.003	368	3.8718	3.7849	368	6.42538	6.4088		458	0.49929	0.7704	458	1.49435	1.3128	468	1.91121	1.9206		363.507	0.79445	0.8236	367	1.59042	1.4624	327	2.80041	2.6418
	349	0.94958	1.4199	369	2.41155	2.6229	369	5.18913	4.8039		379	1.37581	1.9966	369	3.92696	3.7728	369	6.42471	6.3882		459	0.59784	0.7683	459	1.5006	1.3091	469	1.87909	1.9152		364.517	0.79142	0.8212	368	1.61474	1.4581	328	2.78116	2.6341
	350	0.91497	1.4175	370	2.44846	2.6184	370	5.16655	4.7957		380	1.42798	1.9902	370	4.00023	3.7607	370	6.46435	6.3678		460	0.68724	0.7661	460	1.46151	1.3054	470	1.87517	1.9098		365.527	0.77054	0.8189	369	1.63664	1.4539	329	2.72826	2.6264
	351	0.91457	1.4151	371	2.48098	2.6139	371	5.12484	4.7875		381	1.49063	1.9838	371	4.04858	3.7486	371	6.51849	6.3473		461	0.74724	0.764	461	1.38377	1.3018	471	1.89858	1.9045		366.537	0.73718	0.8165	370	1.63895	1.4497	330	2.67023	2.6188
	352	0.93651	1.4127	372	2.49565	2.6094	372	5.09542	4.7793		382	1.53115	1.9775	372	4.04315	3.7366	372	6.55204	6.327		462	0.76429	0.7618	462	1.29185	1.2981	472	1.93859	1.8992		367.547	0.70411	0.8141	371	1.60865	1.4454	331	2.63993	2.6112
	353	0.9612	1.4102	373	2.48029	2.605	373	5.0949	4.7711		383	1.53121	1.9711	373	3.98439	3.7246	373	6.5382	6.3067		463	0.73348	0.7597	463	1.21555	1.2945	473	1.98021	1.8938		368.557	0.68458	0.8117	372	1.54393	1.4412	332	2.65423	2.6036
	354	0.9697	1.4078	374	2.42947	2.6005	374	5.11647	4.763		384	1.49423	1.9648	374	3.90259	3.7127	374	6.47221	6.2864		464	0.65934	0.7576	464	1.1767	1.2909	474	2.01062	1.8885		369.567	0.68526	0.8094	373	1.45577	1.437	333	2.70213	2.596
	355	0.9508	1.4054	375	2.34844	2.5961	375	5.1352	4.7548		385	1.4416	1.9585	375	3.84283	3.7008	375	6.37414	6.2663		465	0.55562	0.7555	465	1.18096	1.2873	475	2.02332	1.8832		370.577	0.70324	0.807	374	1.36418	1.4329	334	2.74987	2.5884
	356	0.90462	1.403	376	2.25344	2.5916	376	5.12402	4.7467		386	1.40048	1.9522	376	3.84167	3.6889	376	6.27951	6.2462		466	0.44374	0.7533	466	1.21788	1.2836	476	2.01831	1.878		371.587	0.72849	0.8047	375	1.29142	1.4287	335	2.76091	2.5809
	357	0.84205	1.4006	377	2.16775	2.5872	377	5.07116	4.7386		387	1.3901	1.9459	377	3.90737	3.677	377	6.22249	6.2261		467	0.34879	0.7512	467	1.26765	1.2801	477	1.99906	1.8727		372.597	0.7499	0.8023	376	1.25493	1.4245	336	2.71883	2.5734
	358	0.78102	1.3982	378	2.11477	2.5828	378	4.98917	4.7305		388	1.41343	1.9397	378	4.01387	3.6653	378	6.22004	6.2062		468	0.29313	0.7491	468	1.31044	1.2765	478	1.96866	1.8674		373.607	0.76107	0.8	377	1.26213	1.4204	337	2.6385	2.5659
	359	0.74109	1.3958	379	2.11063	2.5784	379	4.91016	4.7224		389	1.45767	1.9335	379	4.11196	3.6535	379	6.26496	6.1863		469	0.28905	0.747	469	1.33358	1.2729	479	1.92788	1.8622		374.617	0.76244	0.7977	378	1.30831	1.4163	338	2.55755	2.5585
	360	0.73791	1.3934	380	2.15889	2.574	380	4.86971	4.7143		390	1.50187	1.9273	380	4.15244	3.6418	380	6.33072	6.1664		470	0.33335	0.7449	470	1.33377	1.2693	480	1.87629	1.857		375.628	0.75897	0.7953	379	1.37863	1.4121	339	2.51269	2.551
	361	0.77852	1.3911	381	2.2491	2.5696	381	4.88774	4.7062		391	1.52713	1.9211	381	4.10969	3.6301	381	6.38505	6.1466		471	0.40703	0.7428	471	1.31486	1.2658	481	1.81564	1.8518		376.638	0.75542	0.793	380	1.45376	1.408	340	2.51577	2.5436
	362	0.85837	1.3887	382	2.3594	2.5652	382	4.95689	4.6982		392	1.52386	1.9149	382	3.99407	3.6184	382	6.40516	6.1269		472	0.48113	0.7408	472	1.28375	1.2622	482	1.75292	1.8466		377.648	0.7526	0.7907	381	1.51761	1.4039	341	2.54552	2.5362
	363	0.96106	1.3863	383	2.46219	2.5608	383	5.04451	4.6902		393	1.49361	1.9088	383	3.84671	3.6068	383	6.38676	6.1073		473	0.52737	0.7387	473	1.2472	1.2587	483	1.7007	1.8414		378.658	0.74725	0.7884	382	1.56355	1.3999	342	2.56141	2.5288
	364	1.06129	1.3839	384	2.53131	2.5564	384	5.10788	4.6821		394	1.44623	1.9027	384	3.71972	3.5953	384	6.34302	6.0877		474	0.52913	0.7366	474	1.21112	1.2551	484	1.67352	1.8363		379.668	0.73543	0.7861	383	1.59547	1.3958	343	2.53157	2.5215
	365	1.1312	1.3816	385	2.54872	2.552	385	5.11489	4.6741		395	1.39515	1.8966	385	3.65191	3.5837	385	6.29495	6.0681		475	0.48793	0.7345	475	1.18154	1.2516	485	1.68179	1.8311		380.678	0.71682	0.7838	384	1.62242	1.3917	344	2.45695	2.5141
	366	1.1487	1.3792	386	2.50931	2.5477	386	5.05993	4.6661		396	1.35395	1.8905	386	3.65199	3.5722	386	6.25903	6.0487		476	0.42205	0.7325	476	1.16532	1.2481	486	1.72585	1.826		381.688	0.69684	0.7816	385	1.64945	1.3877	345	2.3749	2.5068
	367	1.10539	1.3769	387	2.42261	2.5433	387	4.96706	4.6582		397	1.33479	1.8844	387	3.69767	3.5608	387	6.23892	6.0293		477	0.35779	0.7304	477	1.16881	1.2446	487	1.79369	1.8209		382.698	0.68463	0.7793	386	1.67048	1.3836	346	2.33824	2.4995
	368	1.01081	1.3745	388	2.31057	2.539	388	4.879	4.6502		398	1.34756	1.8784	388	3.75002	3.5494	388	6.22537	6.0099		478	0.31736	0.7284	478	1.19466	1.2411	488	1.86376	1.8158		383.708	0.68791	0.777	387	1.66903	1.3796	347	2.38179	2.4922
	369	0.89072	1.3721	389	2.20178	2.5346	389	4.8375	4.6422		399	1.39759	1.8723	389	3.77514	3.538	389	6.20367	5.9906		479	0.30945	0.7263	479	1.23852	1.2377	489	1.91235	1.8107		384.718	0.70785	0.7748	388	1.62815	1.3756	348	2.49718	2.485
	370	0.7792	1.3698	390	2.123	2.5303	390	4.86455	4.6343		400	1.48155	1.8663	390	3.76147	3.5266	390	6.16372	5.9714		480	0.32693	0.7243	480	1.28834	1.2342	490	1.9223	1.8056		385.728	0.73721	0.7725	389	1.54451	1.3716	349	2.63306	2.4778
	371	0.70699	1.3675	391	2.09066	2.526	391	4.95329	4.6264		401	1.58349	1.8603	391	3.72373	3.5153	391	6.10673	5.9523		481	0.35292	0.7223	481	1.32765	1.2307	491	1.88951	1.8005		386.738	0.76325	0.7703	390	1.43756	1.3676	350	2.72195	2.4705
	372	0.69049	1.3651	392	2.10525	2.5216	392	5.07206	4.6185		402	1.67473	1.8544	392	3.69212	3.504	392	6.04478	5.9332		482	0.37159	0.7203	482	1.34205	1.2273	492	1.82425	1.7955		387.748	0.77394	0.768	391	1.3458	1.3636	351	2.71822	2.4634
	373	0.72597	1.3628	393	2.15123	2.5173	393	5.1789	4.6106		403	1.72056	1.8484	393	3.6933	3.4928	393	5.99359	5.9141		483	0.37787	0.7182	483	1.32599	1.2238	493	1.74697	1.7905		388.758	0.76399	0.7658	392	1.30975	1.3597	352	2.62423	2.4562
	374	0.79172	1.3605	394	2.20332	2.513	394	5.23898	4.6027		404	1.69316	1.8425	394	3.73378	3.4816	394	5.96289	5.8952		484	0.38051	0.7162	484	1.2859	1.2204	494	1.68038	1.7854		389.768	0.73734	0.7636	393	1.34968	1.3557	353	2.48845	2.449
	375	0.85716	1.3581	395	2.23728	2.5087	395	5.23692	4.5948		405	1.58608	1.8366	395	3.79511	3.4704	395	5.95017	5.8763		485	0.39663	0.7142	485	1.23771	1.217	495	1.64124	1.7804		390.779	0.70477	0.7613	394	1.45133	1.3518	354	2.37679	2.4419
	376	0.89539	1.3558	396	2.24079	2.5044	396	5.17944	4.587		406	1.42271	1.8307	396	3.84322	3.4593	396	5.94135	5.8574		486	0.44057	0.7122	486	1.19938	1.2136	496	1.63507	1.7754		391.789	0.67815	0.7591	395	1.56957	1.3478	355	2.33513	2.4348
	377	0.89362	1.3535	397	2.21977	2.5002	397	5.08853	4.5791		407	1.25287	1.8248	397	3.84693	3.4482	397	5.91827	5.8386		487	0.51308	0.7102	487	1.18202	1.2102	497	1.65548	1.7705		392.799	0.66464	0.7569	396	1.64995	1.3439	356	2.3658	2.4277
	378	0.8573	1.3512	398	2.19647	2.4959	398	4.99026	4.5713		408	1.13649	1.819	398	3.79525	3.4371	398	5.86898	5.8199		488	0.59711	0.7082	488	1.18434	1.2068	498	1.68787	1.7655		393.809	0.66388	0.7547	397	1.65718	1.34	357	2.43172	2.4207
	379	0.80635	1.3489	399	2.19952	2.4916	399	4.90486	4.5635		409	1.11973	1.8131	399	3.70401	3.4261	399	5.79499	5.8012		489	0.66317	0.7062	489	1.19373	1.2034	499	1.71548	1.7606		394.819	0.6694	0.7525	398	1.59427	1.3361	358	2.48356	2.4136
	380	0.7656	1.3466	400	2.24995	2.4873	400	4.84247	4.5557		410	1.2141	1.8073	400	3.60812	3.4151	400	5.71174	5.7826		490	0.68207	0.7043	490	1.19375	1.2	500	1.72539	1.7556		395.829	0.67294	0.7503	399	1.50059	1.3322	359	2.4912	2.4066
	381	0.75389	1.3443	401	2.3494	2.4831	401	4.80468	4.5479		411	1.38865	1.8015	401	3.54368	3.4042	401	5.64181	5.7641		491	0.63893	0.7023	491	1.17441	1.1967	501	1.71247	1.7507		396.839	0.66887	0.7481	400	1.4294	1.3283	360	2.45904	2.3996
	382	0.77653	1.342	402	2.47636	2.4788	402	4.7891	4.5401		412	1.58025	1.7957	402	3.52928	3.3932	402	5.60435	5.7456		492	0.54135	0.7003	492	1.13975	1.1933	502	1.68032	1.7458		397.849	0.65637	0.746	401	1.4174	1.3245	361	2.41672	2.3926
	383	0.82412	1.3397	403	2.59279	2.4746	403	4.79297	4.5323		413	1.71854	1.79	403	3.55657	3.3824	403	5.60621	5.7271		493	0.41733	0.6984	493	1.10822	1.19	503	1.63936	1.7409		398.859	0.63863	0.7438	402	1.46414	1.3206	362	2.39354	2.3857
	384	0.8776	1.3374	404	2.65872	2.4704	404	4.81349	4.5246		414	1.75506	1.7842	404	3.59507	3.3715	404	5.6389	5.7088		494	0.30368	0.6964	494	1.10484	1.1866	504	1.60296	1.736		399.869	0.62025	0.7416	403	1.53335	1.3168	363	2.39569	2.3787
	385	0.91686	1.3351	405	2.64852	2.4662	405	4.84525	4.5168		415	1.68341	1.7785	405	3.6084	3.3607	405	5.68282	5.6905		495	0.23047	0.6944	495	1.14859	1.1833	505	1.58281	1.7312		400.879	0.60487	0.7395	404	1.57524	1.3129	364	2.40203	2.3718
	386	0.92889	1.3328	406	2.56159	2.4619	406	4.87758	4.5091		416	1.5411	1.7728	406	3.57352	3.3499	406	5.71602	5.6722		496	0.20886	0.6925	496	1.24114	1.18	506	1.58473	1.7263		401.889	0.59432	0.7373	405	1.55635	1.3091	365	2.38073	2.3649
	387	0.91248	1.3305	407	2.42272	2.4577	407	4.89491	4.5014		417	1.39242	1.7671	407	3.49294	3.3392	407	5.72327	5.654		497	0.22821	0.6906	497	1.36287	1.1767	507	1.6062	1.7215		402.899	0.58945	0.7352	406	1.47936	1.3053	366	2.3137	2.358
	388	0.87783	1.3282	408	2.27208	2.4535	408	4.88145	4.4937		418	1.29999	1.7615	408	3.39383	3.3284	408	5.70099	5.6359		498	0.26323	0.6886	498	1.47908	1.1734	508	1.63652	1.7166		403.909	0.59124	0.733	407	1.3816	1.3015	367	2.21106	2.3512
	389	0.84211	1.326	409	2.14971	2.4493	409	4.82849	4.486		419	1.29834	1.7558	409	3.31483	3.3178	409	5.65644	5.6178		499	0.2874	0.6867	499	1.55434	1.1701	509	1.66032	1.7118		404.919	0.60088	0.7309	408	1.31381	1.2977	368	2.10523	2.3443
	390	0.82292	1.3237	410	2.08146	2.4451	410	4.74077	4.4784		420	1.38082	1.7502	410	3.28788	3.3071	410	5.60249	5.5998		500	0.28566	0.6848	500	1.56876	1.1668	510	1.66356	1.707		405.93	0.61849	0.7288	409	1.31205	1.294	369	2.02956	2.3375
	391	0.83215	1.3214	411	2.07237	2.441	411	4.63769	4.4707		421	1.50527	1.7446	411	3.32412	3.2965	411	5.55103	5.5818		501	0.26029	0.6829	501	1.52885	1.1635	511	1.64036	1.7022		406.94	0.6414	0.7267	410	1.37866	1.2902	370	1.99761	2.3307
	392	0.87201	1.3192	412	2.10923	2.4368	412	4.54791	4.4631		422	1.61422	1.739	412	3.41066	3.2859	412	5.50843	5.5639		502	0.22762	0.6809	502	1.46734	1.1603	512	1.59758	1.6975		407.95	0.66349	0.7245	411	1.48193	1.2864	371	1.99835	2.3239
	393	0.93404	1.3169	413	2.16987	2.4326	413	4.4988	4.4554		423	1.65963	1.7334	413	3.5188	3.2754	413	5.47476	5.5461		503	0.20802	0.679	503	1.43138	1.157	513	1.55444	1.6927		408.96	0.67684	0.7224	412	1.57285	1.2827	372	2.01035	2.3172
	394	1.00118	1.3147	414	2.23355	2.4285	414	4.50531	4.4478		424	1.62082	1.7278	414	3.61831	3.2649	414	5.44611	5.5283		504	0.21456	0.6771	504	1.46324	1.1538	514	1.53595	1.688		409.97	0.67509	0.7203	413	1.60833	1.279	373	2.02324	2.3104
	395	1.05232	1.3124	415	2.28732	2.4243	415	4.5632	4.4402		425	1.50866	1.7223	415	3.69009	3.2544	415	5.41819	5.5105		505	0.24639	0.6752	505	1.58128	1.1506	515	1.56152	1.6832		410.98	0.65687	0.7182	414	1.56857	1.2752	374	2.04872	2.3037
	396	1.06843	1.3102	416	2.32629	2.4202	416	4.65021	4.4326		426	1.35657	1.7168	416	3.73077	3.244	416	5.38902	5.4929		506	0.28956	0.6733	506	1.76885	1.1473	516	1.63308	1.6785		411.99	0.62733	0.7161	415	1.46171	1.2715	375	2.11071	2.297
	397	1.0389	1.3079	417	2.3495	2.416	417	4.73477	4.425		427	1.20448	1.7112	417	3.74828	3.2336	417	5.35968	5.4752		507	0.32416	0.6714	507	1.9758	1.1441	517	1.7282	1.6738		413	0.5965	0.7141	416	1.31682	1.2678	376	2.22074	2.2903
	398	0.96611	1.3057	418	2.35541	2.4119	418	4.7887	4.4175		428	1.08453	1.7058	418	3.75231	3.2232	418	5.33353	5.4577		508	0.33375	0.6696	508	2.13259	1.1409	518	1.80258	1.6691		414.01	0.57525	0.712	417	1.17176	1.2641	377	2.35738	2.2836
	399	0.86637	1.3035	419	2.3407	2.4078	419	4.7983	4.4099		429	1.01414	1.7003	419	3.746	3.2129	419	5.3148	5.4402		509	0.31205	0.6677	509	2.17193	1.1377	519	1.80287	1.6644		415.02	0.57081	0.7099	418	1.06213	1.2605	378	2.46801	2.277
	400	0.76609	1.3012	420	2.30349	2.4036	420	4.76913	4.4024		430	0.99719	1.6948	420	3.72414	3.2026	420	5.30757	5.4227					510	2.05063	1.1345	520	1.68601	1.6598		416.03	0.58411	0.7078	419	1.01382	1.2568	379	2.4967	2.2704
	401	0.69356	1.299	421	2.24834	2.3995	421	4.72247	4.3948		431	1.02942	1.6894	421	3.67845	3.1923	421	5.31495	5.4053					511	1.76415	1.1313	521	1.43775	1.6551		417.04	0.61016	0.7058	420	1.03817	1.2531	380	2.42216	2.2638
	402	0.66902	1.2968	422	2.18902	2.3954	422	4.68528	4.3873		432	1.10266	1.684	422	3.60627	3.182	422	5.33812	5.388					512	1.34926	1.1282	522	1.08237	1.6505		418.05	0.64089	0.7037	421	1.12828	1.2495	381	2.27983	2.2572
	403	0.69658	1.2946	423	2.14582	2.3913	423	4.67823	4.3798		433	1.20514	1.6786	423	3.51664	3.1718	423	5.37487	5.3707												419.06	0.66889	0.7017	422	1.25755	1.2459	382	2.14946	2.2506
	404	0.76201	1.2924	424	2.13753	2.3872	424	4.70694	4.3723		434	1.31881	1.6732	424	3.42957	3.1617	424	5.41798	5.3535												420.07	0.68979	0.6996	423	1.38424	1.2422	383	2.11131	2.2441
	405	0.83773	1.2902	425	2.17185	2.3832	425	4.76029	4.3649		435	1.41816	1.6678	425	3.36814	3.1515	425	5.45501	5.3363												421.081	0.70261	0.6976	424	1.46393	1.2386	384	2.19608	2.2375
	406	0.89368	1.288	426	2.23971	2.3791	426	4.81609	4.3574		436	1.47422	1.6625	426	3.34761	3.1414	426	5.47065	5.3192												422.091	0.70821	0.6956	425	1.46741	1.235	385	2.36038	2.231
	407	0.90958	1.2858	427	2.31738	2.375	427	4.85145	4.3499		437	1.46451	1.6571	427	3.36773	3.1313	427	5.45192	5.3021												423.101	0.70745	0.6936	426	1.39556	1.2314	386	2.50622	2.2245
	408	0.88299	1.2836	428	2.37624	2.371	428	4.85308	4.3425		438	1.38477	1.6518	428	3.41265	3.1213	428	5.39449	5.2851												424.111	0.70017	0.6915	427	1.28181	1.2278	387	2.53553	2.2181
	409	0.82956	1.2814	429	2.39572	2.3669	429	4.82292	4.3351		439	1.25565	1.6465	429	3.45888	3.1113	429	5.30696	5.2681												425.121	0.68567	0.6895	428	1.17805	1.2243	388	2.40838	2.2116
	410	0.77495	1.2792	430	2.37258	2.3629	430	4.77672	4.3277		440	1.11885	1.6412	430	3.48715	3.1013	430	5.2102	5.2512												426.131	0.66419	0.6875	429	1.12933	1.2207	389	2.16952	2.2052
	411	0.74229	1.277	431	2.32162	2.3588	431	4.73612	4.3203		441	1.02216	1.636	431	3.49173	3.0913	431	5.13068	5.2344												427.141	0.63815	0.6855	430	1.15054	1.2172	390	1.92627	2.1988
	412	0.74122	1.2748	432	2.26688	2.3548	432	4.71803	4.3129		442	0.99907	1.6307	432	3.48243	3.0814	432	5.08986	5.2176												428.151	0.61242	0.6835	431	1.21908	1.2136	391	1.79053	2.1924
	413	0.76384	1.2726	433	2.22819	2.3508	433	4.72608	4.3055		443	1.05261	1.6255	433	3.47818	3.0715	433	5.09424	5.2009												429.161	0.59314	0.6815	432	1.28862	1.2101	392	1.81882	2.186
	414	0.78964	1.2704	434	2.2102	2.3467	434	4.74835	4.2981		444	1.15209	1.6203	434	3.49589	3.0617	434	5.13112	5.1842												430.171	0.58585	0.6796	433	1.317	1.2066	393	1.98519	2.1796
	415	0.7969	1.2683	435	2.20036	2.3427	435	4.76259	4.2908		445	1.24561	1.6151	435	3.54049	3.0519	435	5.17287	5.1676												431.181	0.59351	0.6776	434	1.29197	1.203	394	2.20066	2.1733
	416	0.77453	1.2661	436	2.17712	2.3387	436	4.74703	4.2835		446	1.28361	1.6099	436	3.60158	3.0421	436	5.18851	5.151												432.191	0.61527	0.6756	435	1.23916	1.1995	395	2.36498	2.167
	417	0.72848	1.2639	437	2.12403	2.3347	437	4.69186	4.2761		447	1.24249	1.6047	437	3.65788	3.0323	437	5.15771	5.1345												433.201	0.64611	0.6736	436	1.207	1.1961	396	2.4183	2.1607
	418	0.67918	1.2618	438	2.04187	2.3307	438	4.6059	4.2688		448	1.13698	1.5996	438	3.68703	3.0226	438	5.08032	5.118												434.211	0.67772	0.6717	437	1.23723	1.1926	397	2.36372	2.1544
	419	0.65152	1.2596	439	1.95157	2.3267	439	4.51492	4.2615		449	1.01471	1.5945	439	3.67537	3.0129	439	4.97694	5.1016												435.221	0.70019	0.6697	438	1.33859	1.1891	398	2.2524	2.1481
	420	0.6626	1.2575	440	1.8856	2.3228	440	4.45145	4.2542		450	0.93514	1.5893	440	3.62278	3.0032	440	4.87953	5.0852												436.232	0.70462	0.6678	439	1.47954	1.1856	399	2.1462	2.1419
	421	0.71347	1.2553	441	1.87201	2.3188	441	4.44027	4.247		451	0.94255	1.5842	441	3.54089	2.9936	441	4.81652	5.0689												437.242	0.68606	0.6658	440	1.60438	1.1822	400	2.08417	2.1356
	422	0.78903	1.2532	442	1.9193	2.3148	442	4.48602	4.2397		452	1.04565	1.5792	442	3.44653	2.984	442	4.7995	5.0526												438.252	0.64594	0.6639	441	1.66314	1.1788	401	2.07175	2.1294
	423	0.86582	1.251	443	2.01075	2.3109	443	4.56887	4.2324		453	1.21333	1.5741	443	3.35457	2.9744	443	4.81788	5.0364												439.262	0.59287	0.662	442	1.63774	1.1753	402	2.09303	2.1232
	424	0.92309	1.2489	444	2.11141	2.3069	444	4.65113	4.2252		454	1.38811	1.5691	444	3.27406	2.9649	444	4.84414	5.0203												440.272	0.54078	0.66	443	1.54991	1.1719	403	2.13081	2.117
	425	0.95136	1.2467	445	2.18462	2.303	445	4.69236	4.218		455	1.51063	1.564	445	3.20891	2.9554	445	4.84712	5.0042												441.282	0.50451	0.6581	444	1.44752	1.1685	404	2.17656	2.1109
	426	0.95392	1.2446	446	2.20943	2.299	446	4.66681	4.2108		456	1.54378	1.559	446	3.16133	2.9459	446	4.8069	4.9881												442.292	0.49431	0.6562	445	1.37866	1.1651	405	2.22478	2.1047
	427	0.94145	1.2425	447	2.18984	2.2951	447	4.57512	4.2036		457	1.48567	1.554	447	3.13476	2.9364	447	4.72406	4.9721												443.302	0.51149	0.6543	446	1.3687	1.1617	406	2.2609	2.0986
	428	0.92336	1.2404	448	2.15097	2.2912	448	4.44478	4.1964		458	1.36699	1.549	448	3.13356	2.927	448	4.61941	4.9562												444.312	0.54756	0.6524	447	1.41195	1.1583	407	2.25854	2.0925
	429	0.90158	1.2382	449	2.12434	2.2873	449	4.31878	4.1892		459	1.2354	1.544	449	3.15953	2.9176	449	4.52457	4.9403												445.322	0.58766	0.6505	448	1.47979	1.155	408	2.19393	2.0864
	430	0.8708	1.2361	450	2.13049	2.2833	450	4.23735	4.182		460	1.13558	1.5391	450	3.20775	2.9083	450	4.46854	4.9244												446.332	0.6169	0.6486	449	1.53773	1.1516	409	2.06928	2.0803
	431	0.82486	1.234	451	2.16831	2.2794	451	4.22128	4.1749		461	1.09398	1.5342	451	3.26534	2.8989	451	4.46649	4.9086												447.342	0.62679	0.6467	450	1.56047	1.1483	410	1.92597	2.0743
	432	0.765	1.2319	452	2.21677	2.2755	452	4.26436	4.1677		462	1.11401	1.5292	452	3.31498	2.8896	452	4.51555	4.8929												448.352	0.61852	0.6448	451	1.53812	1.1449	411	1.83177	2.0683
	433	0.70438	1.2298	453	2.24786	2.2717	453	4.33835	4.1606		463	1.18125	1.5243	453	3.34221	2.8804	453	4.59847	4.8772												449.362	0.60144	0.643	452	1.47405	1.1416	412	1.84408	2.0622
	434	0.66454	1.2277	454	2.24317	2.2678	454	4.40757	4.1535		464	1.27391	1.5194	454	3.34249	2.8711	454	4.69202	4.8615												450.372	0.58767	0.6411	453	1.37971	1.1383	413	1.9704	2.0562
	435	0.66483	1.2256	455	2.20465	2.2639	455	4.44586	4.1464		465	1.37186	1.5146	455	3.32379	2.8619	455	4.77541	4.8459												451.383	0.58578	0.6392	454	1.27145	1.1349	414	2.15342	2.0503
	436	0.71006	1.2235	456	2.15333	2.26	456	4.44725	4.1393		466	1.4606	1.5097	456	3.30244	2.8527	456	4.83503	4.8304												452.393	0.59679	0.6374	455	1.17025	1.1316	415	2.29571	2.0443
	437	0.78368	1.2214	457	2.11692	2.2562	457	4.4257	4.1322		467	1.52993	1.5049	457	3.29388	2.8436	457	4.86453	4.8149												453.403	0.61458	0.6355	456	1.10051	1.1284	416	2.31319	2.0383
	438	0.85161	1.2193	458	2.11338	2.2523	458	4.4045	4.1252		468	1.57087	1.5	458	3.3034	2.8345	458	4.86225	4.7994												454.413	0.62997	0.6337	457	1.08438	1.1251	417	2.18599	2.0324
	439	0.87646	1.2172	459	2.1401	2.2484	459	4.40184	4.1181		469	1.57472	1.4952	459	3.32231	2.8254	459	4.82914	4.7841												455.423	0.63598	0.6318	458	1.13192	1.1218	418	1.97372	2.0265
	440	0.83593	1.2151	460	2.17511	2.2446	460	4.42059	4.1111		470	1.53592	1.4904	460	3.33233	2.8163	460	4.76929	4.7687												456.433	0.63106	0.63	459	1.23269	1.1185	419	1.78294	2.0206
	441	0.73601	1.2131	461	2.18998	2.2408	461	4.44792	4.104		471	1.45703	1.4856	461	3.31665	2.8073	461	4.69243	4.7534												457.443	0.61869	0.6281	460	1.35549	1.1153	420	1.70479	2.0147
	442	0.61152	1.211	462	2.16688	2.2369	462	4.46456	4.097		472	1.3521	1.4809	462	3.27143	2.7983	462	4.61584	4.7382												458.453	0.60403	0.6263	461	1.45951	1.112	421	1.76104	2.0089
	443	0.51234	1.2089	463	2.11007	2.2331	463	4.45809	4.09		473	1.24475	1.4761	463	3.21121	2.7893	463	4.5626	4.723												459.463	0.59016	0.6245	462	1.51212	1.1088	422	1.89285	2.003
	444	0.48098	1.2069	464	2.04467	2.2293	464	4.43202	4.083		474	1.16078	1.4714	464	3.1641	2.7804	464	4.55503	4.7078												460.473	0.5763	0.6227	463	1.50383	1.1056	423	1.9998	1.9972
	445	0.53212	1.2048	465	2.00294	2.2255	465	4.40493	4.076		475	1.11818	1.4667	465	3.15831	2.7714	465	4.60536	4.6927												461.483	0.55929	0.6209	464	1.45119	1.1024	424	2.00497	1.9914
	446	0.64433	1.2027	466	2.0056	2.2217	466	4.39965	4.0691		476	1.11986	1.462	466	3.20663	2.7625	466	4.70788	4.6777												462.493	0.53705	0.6191	465	1.38551	1.0991	425	1.90421	1.9856
	447	0.76881	1.2007	467	2.04886	2.2179	467	4.42834	4.0621		477	1.15327	1.4573	467	3.29725	2.7537	467	4.8373	4.6626												463.503	0.51159	0.6173	466	1.3343	1.096	426	1.76803	1.9798
	448	0.85136	1.1986	468	2.10502	2.2141	468	4.48255	4.0552		478	1.19764	1.4526	468	3.39646	2.7448	468	4.95514	4.6477												464.513	0.48921	0.6155	467	1.30669	1.0928	427	1.6945	1.9741
	449	0.85761	1.1966	469	2.13705	2.2103	469	4.53472	4.0482		479	1.23522	1.4479	469	3.46303	2.736	469	5.02263	4.6328												465.523	0.47761	0.6137	468	1.29181	1.0896	428	1.74357	1.9683
	450	0.78903	1.1945	470	2.11935	2.2065	470	4.55153	4.0413		480	1.26064	1.4433	470	3.46742	2.7273	470	5.01478	4.6179												466.534	0.48146	0.6119	469	1.27031	1.0864	429	1.89499	1.9626
	451	0.68201	1.1925	471	2.05315	2.2027	471	4.51232	4.0344		481	1.28319	1.4387	471	3.40634	2.7185	471	4.92972	4.6031												467.544	0.49925	0.6101	470	1.23075	1.0833	430	2.05758	1.9569
	452	0.59025	1.1904	472	1.96734	2.199	472	4.42249	4.0275		482	1.32044	1.4341	472	3.30493	2.7098	472	4.78918	4.5883												468.554	0.52338	0.6083	471	1.1796	1.0801	431	2.12432	1.9512
	453	0.55885	1.1884	473	1.90364	2.1952	473	4.31353	4.0206		483	1.38659	1.4295	473	3.20516	2.7011	473	4.63002	4.5736												469.564	0.54367	0.6066	472	1.13827	1.077	432	2.03923	1.9455
	454	0.60288	1.1864	474	1.89358	2.1915	474	4.22844	4.0137		484	1.4817	1.4249	474	3.14586	2.6924	474	4.49085	4.559												470.574	0.55221	0.6048	473	1.12947	1.0738	433	1.8344	1.9398
	455	0.70072	1.1843	475	1.94022	2.1877	475	4.19954	4.0069		485	1.58789	1.4203	475	3.14457	2.6838	475	4.39929	4.5443												471.584	0.5468	0.603	474	1.16258	1.0707	434	1.61473	1.9342
	456	0.80528	1.1823	476	2.01496	2.184	476	4.23035	4		486	1.67501	1.4157	476	3.19027	2.6752	476	4.36502	4.5297												472.594	0.53131	0.6013	475	1.22764	1.0676	435	1.50005	1.9286
	457	0.86761	1.1803	477	2.07222	2.1802	477	4.2921	3.9932		487	1.71326	1.4112	477	3.25062	2.6666	477	4.38028	4.5152												473.604	0.51281	0.5995	476	1.30143	1.0645	436	1.55957	1.923
	458	0.8609	1.1783	478	2.07453	2.1765	478	4.33778	3.9864		488	1.68678	1.4067	478	3.28975	2.6581	478	4.42638	4.5007												474.614	0.49773	0.5978	477	1.36061	1.0614	437	1.77654	1.9174
	459	0.7932	1.1763	479	2.01433	2.1728	479	4.32715	3.9795		489	1.60156	1.4022	479	3.28716	2.6495	479	4.48216	4.4863												475.624	0.48917	0.5961	478	1.39247	1.0583	438	2.06113	1.9118
	460	0.70272	1.1743	480	1.92025	2.1691	480	4.24968	3.9727		490	1.48375	1.3977	480	3.24788	2.641	480	4.53067	4.4719												476.634	0.48692	0.5943	479	1.39641	1.0552	439	2.3003	1.9062
	461	0.63791	1.1722	481	1.84323	2.1654	481	4.13242	3.9659		491	1.36934	1.3932	481	3.1986	2.6326	481	4.56209	4.4576												477.644	0.48942	0.5926	480	1.37683	1.0521	440	2.41378	1.9007
	462	0.63257	1.1702	482	1.82944	2.1617	482	4.02762	3.9592		492	1.29011	1.3887	482	3.17204	2.6241	482	4.57323	4.4433												478.654	0.49597	0.5909	481	1.33472	1.0491	441	2.38567	1.8952
	463	0.68811	1.1682	483	1.89412	2.158	483	3.98567	3.9524		493	1.26209	1.3843	483	3.18813	2.6157	483	4.56552	4.429												479.664	0.50745	0.5891	482	1.26613	1.046	442	2.25896	1.8896
	464	0.77184	1.1662	484	2.01112	2.1543	484	4.02741	3.9456		494	1.2813	1.3798	484	3.24198	2.6073	484	4.54326	4.4148												480.675	0.52484	0.5874	483	1.16959	1.043	443	2.10321	1.8841
	465	0.83231	1.1643	485	2.12465	2.1506	485	4.13133	3.9389		495	1.32757	1.3754	485	3.30521	2.5989	485	4.51296	4.4006												481.685	0.54701	0.5857	484	1.05671	1.04	444	1.97791	1.8787
	466	0.82441	1.1623	486	2.17816	2.1469	486	4.24371	3.9321		496	1.37364	1.371	486	3.33982	2.5906	486	4.48269	4.3865												482.695	0.56951	0.584	485	0.95599	1.0369	445	1.91158	1.8732
	467	0.73231	1.1603	487	2.1452	2.1432	487	4.30754	3.9254		497	1.39506	1.3666	487	3.31733	2.5823	487	4.46072	4.3724												483.705	0.58579	0.5823	486	0.90359	1.0339	446	1.90211	1.8677
	468	0.57924	1.1583	488	2.04552	2.1396	488	4.29535	3.9187		498	1.37688	1.3622	488	3.23323	2.574	488	4.45272	4.3584												484.715	0.59038	0.5806	487	0.92415	1.0309	447	1.93033	1.8623
	469	0.41924	1.1563	489	1.93658	2.1359	489	4.2275	3.912		499	1.31568	1.3578	489	3.10924	2.5658	489	4.45885	4.3444												485.725	0.58217	0.5789	488	1.0133	1.0279	448	1.97376	1.8569
	470	0.31446	1.1543	490	1.88343	2.1323	490	4.16405	3.9053		500	1.21802	1.3535	490	2.98259	2.5575	490	4.47237	4.3305												486.735	0.56551	0.5773	489	1.13459	1.0249	449	2.01276	1.8515
	471	0.30792	1.1524	491	1.92173	2.1286	491	4.1717	3.8986		501	1.09736	1.3491	491	2.88826	2.5493	491	4.48137	4.3166												487.745	0.54821	0.5756	490	1.2358	1.0219	450	2.03073	1.8461
	472	0.40387	1.1504	492	2.03317	2.125	492	4.28122	3.892		502	0.97134	1.3448	492	2.84343	2.5411	492	4.47355	4.3028												488.755	0.53725	0.5739	491	1.27694	1.019	451	2.01464	1.8407
	473	0.56425	1.1484	493	2.14711	2.1213	493	4.45717	3.8853		503	0.85956	1.3405	493	2.84203	2.533	493	4.44203	4.289												489.765	0.5349	0.5722	492	1.25351	1.016	452	1.95983	1.8354
	474	0.72282	1.1465	494	2.1694	2.1177	494	4.5979	3.8787		504	0.78095	1.3362	494	2.86147	2.5249	494	4.38915	4.2752												490.775	0.53752	0.5706	493	1.20016	1.013	453	1.87632	1.83
	475	0.81096	1.1445	495	2.02548	2.1141	495	4.56951	3.872		505	0.74994	1.3319	495	2.877	2.5168	495	4.32628	4.2615												491.785	0.53795	0.5689	494	1.17078	1.0101	454	1.78933	1.8247
	476	0.78429	1.1425	496	1.69719	2.1105	496	4.26081	3.8654		506	0.7718	1.3276	496	2.87552	2.5087	496	4.26924	4.2478												492.795	0.53011	0.5672	495	1.20612	1.0072	455	1.72986	1.8194
	477	0.63954	1.1406	497	1.23524	2.1069	497	3.63537	3.8588		507	0.83928	1.3234	497	2.8612	2.5006	497	4.23186	4.2342												493.805	0.51288	0.5656	496	1.308	1.0042	456	1.71881	1.8141
	478	0.41514	1.1386				498	2.75594	3.8522		508	0.93291	1.3191	498	2.85029	2.4926	498	4.22067	4.2206												494.815	0.49107	0.564	497	1.43614	1.0013	457	1.75493	1.8088
											509	1.02647	1.3149	499	2.85878	2.4846	499	4.23373	4.2071												495.825	0.47261	0.5623	498	1.52987	0.9984	458	1.81587	1.8036
											510	1.09609	1.3107	500	2.89047	2.4767	500	4.26337	4.1936												496.836	0.46387	0.5607	499	1.54187	0.9955	459	1.87331	1.7983
											511	1.12944	1.3065	501	2.9326	2.4687	501	4.30115	4.1801												497.846	0.46596	0.559	500	1.46382	0.9926	460	1.91251	1.7931
											512	1.13051	1.3023	502	2.96192	2.4608	502	4.34138	4.1667												498.856	0.47431	0.5574	501	1.32883	0.9897	461	1.94239	1.7879
											513	1.117	1.2981	503	2.95774	2.4529	503	4.38118	4.1533												499.866	0.48167	0.5558	502	1.19034	0.9868	462	1.9878	1.7827
											514	1.11117	1.2939	504	2.91468	2.445	504	4.41727	4.14												500.876	0.48268	0.5542	503	1.09114	0.9839	463	2.06827	1.7775
											515	1.12812	1.2898	505	2.84743	2.4372	505	4.44222	4.1267												501.886	0.47701	0.5526	504	1.04206	0.9811	464	2.17767	1.7723
											516	1.16752	1.2856	506	2.78461	2.4294	506	4.44369	4.1135												502.896	0.46913	0.551	505	1.02253	0.9782	465	2.27983	1.7672
											517	1.21301	1.2815	507	2.7543	2.4216	507	4.40838	4.1003												503.906	0.465	0.5494	506	1.00114	0.9754	466	2.32501	1.762
											518	1.24007	1.2774	508	2.76911	2.4138	508	4.32963	4.0872												504.916	0.46783	0.5478	507	0.96148	0.9725	467	2.27779	1.7569
											519	1.22849	1.2733	509	2.81861	2.4061	509	4.21423	4.074												505.926	0.47588	0.5462	508	0.91589	0.9697	468	2.13849	1.7518
											520	1.17326	1.2692	510	2.8737	2.3983	510	4.08406	4.061												506.936	0.48383	0.5446	509	0.898	0.9669	469	1.9442	1.7467
											521	1.08818	1.2652	511	2.90084	2.3906	511	3.96993	4.048												507.946	0.48676	0.543	510	0.93908	0.9641	470	1.74874	1.7416
											522	1.00025	1.2611	512	2.87917	2.383	512	3.89972	4.035												508.956	0.48431	0.5414	511	1.04381	0.9613	471	1.595	1.7365
											523	0.93758	1.2571	513	2.8116	2.3753	513	3.88605	4.022												509.966	0.48185	0.5398	512	1.18121	0.9585	472	1.49768	1.7315
											524	0.91679	1.253	514	2.72445	2.3677	514	3.92028	4.0091												510.977	0.48774	0.5383	513	1.29712	0.9557	473	1.44654	1.7264
											525	0.93628	1.249	515	2.65563	2.3601	515	3.9763	3.9963												511.987	0.50781	0.5367	514	1.34129	0.9529	474	1.42557	1.7214
											526	0.97835	1.245	516	2.63731	2.3525	516	4.02297	3.9834												512.997	0.54048	0.5351	515	1.29324	0.9501	475	1.4324	1.7164
											527	1.01875	1.241	517	2.68167	2.345	517	4.03907	3.9707												514.007	0.57556	0.5336	516	1.17238	0.9474	476	1.48256	1.7114
											528	1.03841	1.237	518	2.77619	2.3375	518	4.02282	3.9579												515.017	0.59799	0.532	517	1.02726	0.9446	477	1.59512	1.7064
											529	1.0313	1.2331	519	2.89026	2.33	519	3.99082	3.9452												516.027	0.59482	0.5305	518	0.91093	0.9419	478	1.77051	1.7015
											530	1.00453	1.2291	520	2.98898	2.3225	520	3.96682	3.9326												517.037	0.56192	0.5289	519	0.8563	0.9391	479	1.9783	1.6965
											531	0.97166	1.2252	521	3.04698	2.3151	521	3.96639	3.92												518.047	0.50684	0.5274	520	0.86418	0.9364	480	2.16608	1.6916
											532	0.94332	1.2212	522	3.05586	2.3076	522	3.98623	3.9074												519.057	0.44618	0.5259	521	0.90836	0.9337	481	2.28584	1.6867
											533	0.92087	1.2173	523	3.02267	2.3002	523	4.00443	3.8948												520.067	0.39886	0.5243	522	0.95274	0.931	482	2.32105	1.6818
											534	0.89681	1.2134	524	2.96183	2.2929	524	3.99219	3.8824												521.077	0.3785	0.5228	523	0.96986	0.9282	483	2.29558	1.6769
											535	0.86134	1.2095	525	2.88607	2.2855	525	3.93074	3.8699												522.087	0.38855	0.5213	524	0.9516	0.9255	484	2.25738	1.672
											536	0.8112	1.2056	526	2.80168	2.2782	526	3.82409	3.8575												523.097	0.42199	0.5198	525	0.90849	0.9229	485	2.24649	1.6671
											537	0.75512	1.2018	527	2.71019	2.2709	527	3.70003	3.8451												524.107	0.46525	0.5183	526	0.86063	0.9202	486	2.26823	1.6623
											538	0.71234	1.1979	528	2.61442	2.2636	528	3.59804	3.8328												525.117	0.50391	0.5168	527	0.82657	0.9175	487	2.28964	1.6574
											539	0.70429	1.1941	529	2.52397	2.2563	529	3.55013	3.8205												526.128	0.52743	0.5152	528	0.81595	0.9148	488	2.26238	1.6526
											540	0.74366	1.1902	530	2.45566	2.2491	530	3.56473	3.8082												527.138	0.53138	0.5137	529	0.8279	0.9122	489	2.15793	1.6478
											541	0.82657	1.1864	531	2.42755	2.2419	531	3.62252	3.796												528.148	0.51709	0.5123	530	0.85442	0.9095	490	1.99258	1.643
											542	0.93235	1.1826	532	2.44914	2.2347	532	3.68681	3.7838												529.158	0.48988	0.5108	531	0.88551	0.9069	491	1.82575	1.6382
											543	1.03135	1.1788	533	2.5134	2.2275	533	3.72286	3.7717												530.168	0.45717	0.5093	532	0.91351	0.9042	492	1.73151	1.6335
											544	1.09709	1.175	534	2.59563	2.2204	534	3.71575	3.7596												531.178	0.42704	0.5078	533	0.93515	0.9016	493	1.75951	1.6287
											545	1.11695	1.1713	535	2.66114	2.2132	535	3.67697	3.7475												532.188	0.40702	0.5063	534	0.95101	0.899	494	1.90748	1.624
											546	1.09626	1.1675	536	2.67893	2.2061	536	3.63598	3.7355												533.198	0.40247	0.5048	535	0.96285	0.8964	495	2.1201	1.6192
											547	1.05395	1.1638	537	2.63518	2.1991	537	3.62143	3.7235												534.208	0.41474	0.5034	536	0.9703	0.8937	496	2.31409	1.6145
											548	1.0126	1.16	538	2.54015	2.192	538	3.64294	3.7116												535.218	0.43981	0.5019	537	0.96846	0.8911	497	2.4152	1.6098
											549	0.98783	1.1563	539	2.42481	2.185	539	3.68364	3.6997												536.228	0.46878	0.5005	538	0.94874	0.8886	498	2.38889	1.6052
											550	0.98255	1.1526	540	2.32863	2.178	540	3.70836	3.6878												537.238	0.49057	0.499	539	0.9035	0.886	499	2.25136	1.6005
											551	0.98833	1.1489	541	2.28385	2.171	541	3.68301	3.676												538.248	0.49633	0.4975	540	0.83326	0.8834	500	2.05912	1.5958
											552	0.99241	1.1452	542	2.30344	2.164	542	3.59453	3.6642												539.258	0.48339	0.4961	541	0.75234	0.8808	501	1.88405	1.5912
											553	0.98612	1.1415	543	2.37764	2.1571	543	3.45994	3.6524												540.268	0.4567	0.4947	542	0.68851	0.8783	502	1.78511	1.5866
											554	0.96981	1.1379	544	2.48018	2.1501	544	3.31911	3.6407												541.279	0.42664	0.4932	543	0.67417	0.8757	503	1.78638	1.5819
											555	0.95163	1.1342	545	2.58034	2.1432	545	3.21484	3.629												542.289	0.4041	0.4918	544	0.7314	0.8732	504	1.8676	1.5773
											556	0.94121	1.1306	546	2.6551	2.1364	546	3.17123	3.6174												543.299	0.39525	0.4903	545	0.85801	0.8706	505	1.97027	1.5728
											557	0.94206	1.127	547	2.69576	2.1295	547	3.18243	3.6058												544.309	0.39898	0.4889	546	1.02261	0.8681	506	2.01876	1.5682
											558	0.94739	1.1234	548	2.70719	2.1227	548	3.2182	3.5942												545.319	0.4083	0.4875	547	1.17364	0.8656	507	1.95138	1.5636
											559	0.94218	1.1197	549	2.70124	2.1159	549	3.24315	3.5827												546.329	0.41496	0.4861	548	1.25976	0.863	508	1.75076	1.5591
											560	0.91108	1.1162	550	2.68878	2.1091	550	3.23871	3.5712												547.339	0.41459	0.4847	549	1.25249	0.8605	509	1.45945	1.5545
											561	0.84808	1.1126	551	2.67476	2.1023	551	3.21488	3.5597												548.349	0.4092	0.4833	550	1.15956	0.858	510	1.16967	1.55
											562	0.76306	1.109	552	2.65839	2.0956	552	3.20468	3.5483												549.359	0.40555	0.4818	551	1.0215	0.8555	511	0.98688	1.5455
											563	0.68097	1.1054	553	2.63723	2.0889	553	3.24372	3.5369												550.369	0.41036	0.4804	552	0.89271	0.853	512	0.98143	1.541
											564	0.63334	1.1019	554	2.61194	2.0822	554	3.34646	3.5256												551.379	0.42518	0.479	553	0.8165	0.8506	513	1.1524	1.5365
											565	0.645	1.0984	555	2.58818	2.0755	555	3.49276	3.5143												552.389	0.44442	0.4777	554	0.8068	0.8481	514	1.42456	1.532
											566	0.72183	1.0948	556	2.57412	2.0688	556	3.63342	3.503												553.399	0.45774	0.4763	555	0.84555	0.8456	515	1.68326	1.5276
											567	0.84506	1.0913	557	2.57506	2.0622	557	3.71248	3.4918												554.409	0.45588	0.4749	556	0.89595	0.8432	516	1.83035	1.5231
											568	0.97526	1.0878	558	2.58861	2.0556	558	3.69503	3.4806												555.419	0.43641	0.4735	557	0.92366	0.8407	517	1.83078	1.5187
											569	1.0649	1.0843	559	2.60378	2.049	559	3.58518	3.4694												556.43	0.40598	0.4721	558	0.9139	0.8383	518	1.72325	1.5143
											570	1.07506	1.0809	560	2.60533	2.0424	560	3.42449	3.4583												557.44	0.37751	0.4707	559	0.87625	0.8358	519	1.58905	1.5099
											571	0.98953	1.0774	561	2.5816	2.0359	561	3.27124	3.4472												558.45	0.36358	0.4694	560	0.8358	0.8334	520	1.49855	1.5055
											572	0.82076	1.0739	562	2.53165	2.0293	562	3.17194	3.4361												559.46	0.3698	0.468	561	0.81732	0.831	521	1.46901	1.5011
														563	2.46774	2.0228	563	3.14052	3.4251												560.47	0.39181	0.4667	562	0.8315	0.8285	522	1.46006	1.4967
														564	2.4109	2.0163	564	3.15639	3.4141												561.48	0.41764	0.4653	563	0.87066	0.8261	523	1.40897	1.4924
														565	2.3814	2.0099	565	3.18166	3.4032												562.49	0.43415	0.4639	564	0.91451	0.8237	524	1.28159	1.4881
														566	2.3885	2.0034	566	3.18671	3.3923												563.5	0.43374	0.4626	565	0.94178	0.8213	525	1.10387	1.4837
														567	2.42478	1.997	567	3.16813	3.3814												564.51	0.41764	0.4612	566	0.94071	0.8189	526	0.95149	1.4794
														568	2.46832	1.9906	568	3.14751	3.3705												565.52	0.39405	0.4599	567	0.91351	0.8166	527	0.90291	1.4751
														569	2.49233	1.9842	569	3.15086	3.3597												566.53	0.37255	0.4586	568	0.87362	0.8142	528	0.9863	1.4708
														570	2.47761	1.9778	570	3.18053	3.3489												567.54	0.35834	0.4572	569	0.83849	0.8118	529	1.15629	1.4665
														571	2.42204	1.9715	571	3.19769	3.3382												568.55	0.34989	0.4559	570	0.82171	0.8095	530	1.31768	1.4623
														572	2.34204	1.9652	572	3.12856	3.3275												569.56	0.34127	0.4546	571	0.82787	0.8071	531	1.38248	1.458
														573	2.26494	1.9588	573	2.89541	3.3168												570.57	0.32747	0.4533	572	0.8515	0.8048	532	1.324	1.4538
														574	2.21582	1.9526	574	2.45834	3.3062												571.581	0.30901	0.4519	573	0.87996	0.8024	533	1.19305	1.4495
														575	2.20503	1.9463	575	1.84642	3.2956												572.591	0.29271	0.4506	574	0.89902	0.8001	534	1.08501	1.4453
														576	2.22286	1.9401															573.601	0.28782	0.4493	575	0.89925	0.7977	535	1.07884	1.4411
														577	2.24425	1.9338															574.611	0.29989	0.448	576	0.88099	0.7954	536	1.18713	1.4369
														578	2.2415	1.9276															575.621	0.32627	0.4467	577	0.85531	0.7931	537	1.34905	1.4327
														579	2.19899	1.9214															576.631	0.3565	0.4454	578	0.83959	0.7908	538	1.47	1.4286
														580	2.12249	1.9153															577.641	0.37752	0.4441	579	0.84863	0.7885	539	1.48126	1.4244
														581	2.03799	1.9091															578.651	0.38099	0.4428	580	0.88512	0.7862	540	1.38078	1.4203
														582	1.98033	1.903															579.661	0.36807	0.4415	581	0.93509	0.7839	541	1.22967	1.4161
														583	1.97675	1.8969															580.671	0.34869	0.4402	582	0.97211	0.7816	542	1.10864	1.412
														584	2.03339	1.8908															581.681	0.33542	0.439	583	0.96994	0.7794	543	1.06502	1.4079
														585	2.13167	1.8848															582.691	0.33567	0.4377	584	0.91761	0.7771	544	1.08591	1.4038
														586	2.23668	1.8787															583.701	0.34684	0.4364	585	0.82832	0.7748	545	1.11398	1.3997
														587	2.31386	1.8727															584.711	0.35773	0.4351	586	0.73564	0.7726	546	1.09309	1.3957
														588	2.34561	1.8667															585.721	0.35559	0.4339	587	0.67733	0.7703	547	1.01058	1.3916
														589	2.33935	1.8607															586.732	0.33455	0.4326	588	0.67486	0.7681	548	0.90647	1.3876
														590	2.3222	1.8547															587.742	0.30044	0.4313	589	0.72015	0.7659	549	0.84346	1.3835
														591	2.32425	1.8488															588.752	0.26857	0.4301	590	0.7783	0.7636	550	0.85919	1.3795
														592	2.35819	1.8428															589.762	0.25552	0.4288	591	0.80607	0.7614	551	0.93508	1.3755
														593	2.40583	1.8369															590.772	0.26962	0.4276	592	0.77632	0.7592	552	1.00485	1.3715
														594	2.41928	1.831															591.782	0.30561	0.4263	593	0.6945	0.757	553	0.99876	1.3675
														595	2.33812	1.8252															592.792	0.34691	0.4251	594	0.59693	0.7548	554	0.89435	1.3635
														596	2.11587	1.8193															593.802	0.37442	0.4239	595	0.53115	0.7526	555	0.73895	1.3595
														597	1.74432	1.8135															594.812	0.37685	0.4226	596	0.52927	0.7504	556	0.62696	1.3556
														598	1.26399	1.8077															595.822	0.35665	0.4214	597	0.58975	0.7482	557	0.64383	1.3516
																															596.832	0.32818	0.4202	598	0.67828	0.746	558	0.81106	1.3477
																															597.842	0.30916	0.419	599	0.74744	0.7439	559	1.06623	1.3438
																															598.852	0.31038	0.4177	600	0.7632	0.7417	560	1.29126	1.3399
																															599.862	0.32973	0.4165	601	0.72302	0.7395	561	1.37252	1.336
																															600.872	0.35375	0.4153	602	0.65499	0.7374	562	1.25825	1.3321
																															601.883	0.36593	0.4141	603	0.59948	0.7352	563	0.98158	1.3282
																															602.893	0.35652	0.4129	604	0.58495	0.7331	564	0.63899	1.3244
																															603.903	0.32836	0.4117	605	0.61257	0.731	565	0.33956	1.3205
																															604.913	0.29529	0.4105	606	0.65827	0.7289	566	0.15527	1.3167
																															605.923	0.27426	0.4093	607	0.68958	0.7267
																															606.933	0.27587	0.4081	608	0.68568	0.7246
																															607.943	0.29862	0.4069	609	0.64803	0.7225
																															608.953	0.33007	0.4057	610	0.59583	0.7204
																															609.963	0.35387	0.4046	611	0.55111	0.7183
																															610.973	0.35846	0.4034	612	0.52466	0.7162
																															611.983	0.34261	0.4022	613	0.5128	0.7141
																															612.993	0.31502	0.401	614	0.50669	0.7121
																															614.003	0.28876	0.3999	615	0.50633	0.71
																															615.013	0.27419	0.3987	616	0.52751	0.7079
																															616.023	0.27425	0.3976	617	0.59465	0.7059
																															617.034	0.28435	0.3964	618	0.72232	0.7038
																															618.044	0.29619	0.3952	619	0.89745	0.7018
																															619.054	0.30269	0.3941	620	1.0757	0.6997
																															620.064	0.30115	0.3929	621	1.19754	0.6977
																															621.074	0.29321	0.3918	622	1.21735	0.6957
																															622.084	0.2824	0.3907	623	1.12939	0.6936
																															623.094	0.27126	0.3895	624	0.9747	0.6916
																															624.104	0.26	0.3884	625	0.82304	0.6896
																															625.114	0.24702	0.3873	626	0.73854	0.6876
																															626.124	0.23056	0.3861	627	0.74752	0.6856
																															627.134	0.21009	0.385	628	0.82641	0.6836
																															628.144	0.18651	0.3839	629	0.91647	0.6816
																															629.154	0.16146	0.3828	630	0.95667	0.6796
																															630.164	0.13673	0.3817	631	0.91606	0.6776
																															631.174	0.11433	0.3806	632	0.80775	0.6757
																															632.185	0.09707	0.3794	633	0.67786	0.6737
																															633.195	0.08867	0.3783	634	0.57757	0.6718
																															634.205	0.09256	0.3772	635	0.53554	0.6698
																															635.215	0.10953	0.3761	636	0.54682	0.6678
																															636.225	0.13568	0.3751	637	0.58292	0.6659
																															637.235	0.1625	0.374	638	0.61481	0.664
																															638.245	0.17987	0.3729	639	0.63285	0.662
																															639.255	0.18092	0.3718	640	0.65075	0.6601
																															640.265	0.16615	0.3707	641	0.6917	0.6582
																															641.275	0.14408	0.3696	642	0.76667	0.6563
																															642.285	0.12721	0.3686	643	0.86028	0.6544
																															643.295	0.12521	0.3675	644	0.93448	0.6525
																															644.305	0.13896	0.3664	645	0.94879	0.6506
																															645.315	0.15919	0.3653	646	0.88482	0.6487
																															646.326	0.17109	0.3643	647	0.75954	0.6468
																															647.336	0.16274	0.3632	648	0.61845	0.6449
																															648.346	0.13276	0.3622	649	0.51225	0.643
																															649.356	0.09245	0.3611	650	0.47069	0.6412
																															650.366	0.06081	0.3601	651	0.48912	0.6393
																															651.376	0.05467	0.359	652	0.53526	0.6374
																															652.386	0.07926	0.358	653	0.57123	0.6356
																															653.396	0.1247	0.3569	654	0.57673	0.6337
																															654.406	0.17051	0.3559	655	0.55905	0.6319
																															655.416	0.19618	0.3549	656	0.54429	0.63
																															656.426	0.1919	0.3538	657	0.55633	0.6282
																															657.436	0.16384	0.3528	658	0.59799	0.6264
																															658.446	0.13074	0.3518	659	0.64681	0.6246
																															659.456	0.11389	0.3507	660	0.66868	0.6227
																															660.466	0.12565	0.3497	661	0.64052	0.6209
																															661.477	0.1629	0.3487	662	0.56739	0.6191
																															662.487	0.20849	0.3477	663	0.48257	0.6173
																															663.497	0.23997	0.3467	664	0.42984	0.6155
																															664.507	0.24057	0.3457	665	0.43827	0.6137
																															665.517	0.20688	0.3447	666	0.50466	0.612
																															666.527	0.14964	0.3437	667	0.59406	0.6102
																															667.537	0.08785	0.3427	668	0.65783	0.6084
																															668.547	0.0399	0.3417	669	0.6585	0.6066
																															669.557	0.01641	0.3407	670	0.58703	0.6049
																															670.567	0.01793	0.3397	671	0.4636	0.6031
																															671.577	0.03749	0.3387	672	0.32311	0.6013
																															672.587	0.06565	0.3377	673	0.19581	0.5996
																															673.597	0.09478	0.3367
																															674.607	0.12046	0.3357
																															675.617	0.14043	0.3348
																															676.628	0.15269	0.3338
																															677.638	0.15497	0.3328
																															678.648	0.14587	0.3319
																															679.658	0.1269	0.3309
																															680.668	0.10335	0.3299
																															681.678	0.0827	0.329
																															682.688	0.07118	0.328
																															683.698	0.07036	0.3271
																															684.708	0.07602	0.3261
																															685.718	0.08044	0.3252
																															686.728	0.07695	0.3242
																															687.738	0.06426	0.3233
																															688.748	0.04775	0.3223
																															689.758	0.03687	0.3214
																															690.768	0.03974	0.3204
																															691.779	0.05807	0.3195
																															692.789	0.08547	0.3186
																															693.799	0.11013	0.3177
																															694.809	0.12063	0.3167
																															695.819	0.11176	0.3158
																															696.829	0.08702	0.3149
																															697.839	0.05665	0.314
																															698.849	0.03226	0.3131
																															699.859	0.02117	0.3122
																															700.869	0.0234	0.3112
																															701.879	0.03288	0.3103
																															702.889	0.04152	0.3094
																															703.899	0.04382	0.3085
																															704.909	0.03908	0.3076
																															705.919	0.03029	0.3067
																															706.93	0.02095	0.3059
																															707.94	0.01206	0.305
																															708.95	0.00156	0.3041
																															709.96	-0.01348	0.3032
																															710.97	-0.03345	0.3023
																															711.98	-0.05419	0.3014
																															712.99	-0.06812	0.3006
																															714	-0.0683	0.2997

## Sheet: Fig4
SPR response									Fit
Time(s)	Response(RU)	Time(s)	Response(RU)	Time(s)	Response(RU)	Time(s)	Response(RU)		Time(s)	Response(RU)	Time(s)	Response(RU)	Time(s)	Response(RU)	Time(s)	Response(RU)
0	33.3058	0	26.0571	0	19.8361	0	0.47088		39.0625	-16.6138	39.0625	-11.4454	39.0625	-7.75752	39.125	59.1258
1.02549	26.3942	1.02468	30.3614	1.02488	37.1761	1.02528	30.4318		40.0625	-14.2922	40.0625	-3.60333	40.0625	29.3158	40.125	156.196
2.05097	29.3378	2.04935	36.2217	2.04976	21.7932	2.05057	30.51		41.0625	-12.0315	41.0625	3.67489	41.0625	60.9068	41.125	232.729
3.07646	19.2824	3.07403	37.6072	3.07464	28.9812	3.07585	18.725		42.0625	-9.83028	42.0625	10.4298	42.0625	87.8262	42.125	293.069
4.10194	33.3394	4.09871	36.3142	4.09952	32.5505	4.10114	18.0557		43.0625	-7.68686	43.0625	16.6991	43.0625	110.765	43.125	340.643
5.12743	33.2509	5.12338	42.6628	5.1244	31.6635	5.12642	35.0382		44.0625	-5.59974	44.0625	22.5177	44.0625	130.311	44.125	378.152
6.15291	20.3494	6.14806	30.8486	6.14928	21.6422	6.15171	20.9871		45.0625	-3.56746	45.0625	27.9179	45.0625	146.967	45.125	407.725
7.1784	21.9714	7.17273	45.1575	7.17416	28.9428	7.17699	29.862		46.0625	-1.58857	46.0625	32.9299	46.0625	161.16	46.125	431.041
8.20388	18.382	8.19741	37.0315	8.19904	18.8983	8.20228	29.864		47.0625	0.33833	47.0625	37.5816	47.0625	173.255	47.125	449.424
9.22937	21.4328	9.22209	40.5609	9.22392	30.0786	9.22756	30.8232		48.0625	2.21462	48.0625	41.8988	48.0625	183.56	48.125	463.918
10.2548	25.8632	10.2468	41.8863	10.2488	29.3476	10.2529	33.7992		49.0625	4.0416	49.0625	45.9056	49.0625	192.342	49.125	475.345
11.2803	17.5174	11.2714	47.6928	11.2737	30.1077	11.2781	35.5523		50.0625	5.82059	50.0625	49.6243	50.0625	199.825	50.125	484.354
12.3058	15.4785	12.2961	34.5677	12.2986	34.3328	12.3034	22.4702		51.0625	7.55285	51.0625	53.0757	51.0625	206.202	51.125	491.458
13.3313	26.5699	13.3208	43.407	13.3234	49.7321	13.3287	25.401		52.0625	9.23959	52.0625	56.279	52.0625	211.635	52.125	497.058
14.3568	21.6271	14.3455	34.5006	14.3483	34.5011	14.354	20.5254		53.0625	10.882	53.0625	59.2519	53.0625	216.265	53.125	501.474
15.3823	13.5029	15.3702	33.694	15.3732	39.2968	15.3793	17.4214		54.0625	12.4813	54.0625	62.0111	54.0625	220.211	54.125	504.955
16.4078	22.1259	16.3948	23.8124	16.3981	39.176	16.4046	12.6428		55.0625	14.0386	55.0625	64.572	55.0625	223.573	55.125	507.7
17.4333	20.8232	17.4195	34.7582	17.423	33.9229	17.4298	14.548		56.0625	15.5549	56.0625	66.9487	56.0625	226.438	56.125	509.864
18.4587	10.9821	18.4442	19.6211	18.4478	25.6185	18.4551	14.838		57.0625	17.0315	57.0625	69.1546	57.0625	228.879	57.125	511.57
19.4842	27.6873	19.4688	36.382	19.4727	34.9393	19.4804	28.5265		58.0625	18.4692	58.0625	71.2018	58.0625	230.959	58.125	512.915
20.5097	28.6793	20.4935	34.2529	20.4976	24.8862	20.5057	27.0951		59.0625	19.8691	59.0625	73.1019	59.0625	232.732	59.125	513.976
21.5352	20.4498	21.5182	27.4036	21.5225	38.9614	21.531	26.1314		60.0625	21.2323	60.0625	74.8653	60.0625	234.242	60.125	514.812
22.5607	22.3948	22.5429	34.7381	22.5474	36.6207	22.5563	23.3195		61.0625	22.5597	61.0625	76.502	61.0625	235.529	61.125	515.471
23.5862	39.1747	23.5676	46.0538	23.5723	47.0098	23.5816	23.3699		62.0625	23.8522	62.0625	78.021	62.0625	236.626	62.125	515.991
24.6117	22.3248	24.5922	20.7468	24.5971	42.4958	24.6068	25.865		63.0625	25.1107	63.0625	79.4308	63.0625	237.56	63.125	516.401
25.6371	24.1238	25.6169	30.4368	25.622	41.973	25.6321	-3.43671		64.0625	26.3362	64.0625	80.7393	64.0625	238.357	64.125	516.724
26.6626	13.4367	26.6416	15.5575	26.6469	35.3314	26.6574	1.20118		65.0625	27.5295	65.0625	81.9536	65.0625	239.035	65.125	516.979
27.6881	13.6456	27.6663	20.8566	27.6718	26.5437	27.6827	3.30824		66.0625	28.6914	66.0625	83.0807	66.0625	239.614	66.125	517.18
28.7136	14.0025	28.6909	9.62213	28.6967	8.01596	28.708	-7.68511		67.0625	29.8228	67.0625	84.1267	67.0625	240.106	67.125	517.338
29.7391	-0.21964	29.7156	2.64181	29.7215	1.97364	29.7333	-0.5305		68.0625	30.9245	68.0625	85.0975	68.0625	240.526	68.125	517.463
30.7646	-5.75545	30.7403	-2.02356	30.7464	-10.7915	30.7585	0.4454		69.0625	31.9972	69.0625	85.9986	69.0625	240.884	69.125	517.562
31.7901	-1.45796	31.765	6.79996	31.7713	-19.0226	31.7838	-11.8039		70.0625	33.0418	70.0625	86.8348	70.0625	241.189	70.125	517.639
32.8155	3.26799	32.7896	1.00752	32.7962	-14.2053	32.8091	-9.79402		71.0625	34.0589	71.0625	87.6109	71.0625	241.449	71.125	517.7
33.841	-5.22681	33.8143	-7.46748	33.821	-13.9181	33.8344	-15.0808		72.0625	35.0493	72.0625	88.3313	72.0625	241.67	72.125	517.749
34.8665	-6.71523	34.839	-1.22571	34.8459	-18.0853	34.8597	-32.3562		73.0625	36.0137	73.0625	88.9998	73.0625	241.859	73.125	517.787
35.892	1.22296	35.8637	1.10778	35.8708	-2.77019	35.885	-40.4557		74.0625	36.9527	74.0625	89.6203	74.0625	242.02	74.125	517.817
36.9175	7.13274	36.8884	-2.00313	36.8957	-2.01002	36.9102	-41.2506		75.0625	37.8671	75.0625	90.1961	75.0625	242.156	75.125	517.84
37.943	0.8934	37.913	-1.95185	37.9206	-1.24782	37.9355	-20.4334		76.0625	38.7574	76.0625	90.7306	76.0625	242.273	76.125	517.859
38.9684	-4.57981	38.9377	-1.159	38.9455	1.01362	38.9608	12.7336		77.0625	39.6244	77.0625	91.2266	77.0625	242.373	77.125	517.874
39.9939	9.93087	39.9624	5.85809	39.9703	6.8419	39.9861	56.4427		78.0625	40.4686	78.0625	91.687	78.0625	242.457	78.125	517.885
41.0194	2.75705	40.9871	1.54806	40.9952	15.3281	41.0114	121.148		79.0625	41.2906	79.0625	92.1143	79.0625	242.53	79.125	517.894
42.0449	1.02613	42.0117	7.69333	42.0201	19.7851	42.0367	192.201		80.0625	42.091	80.0625	92.5108	80.0625	242.591	80.125	517.902
43.0704	-3.48185	43.0364	6.13247	43.045	51.8075	43.062	280.817		81.0625	42.8704	81.0625	92.8789	81.0625	242.644	81.125	517.907
44.0959	5.1927	44.0611	17.1271	44.0699	66.8539	44.0872	339.807		82.0625	43.6293	82.0625	93.2205	82.0625	242.688	82.125	517.912
45.1214	-7.33244	45.0858	2.02521	45.0947	97.0508	45.1125	407.161		83.0625	44.3682	83.0625	93.5375	83.0625	242.726	83.125	517.915
46.1468	1.51033	46.1104	18.7739	46.1196	125.402	46.1378	427.264		84.0625	45.0878	84.0625	93.8317	84.0625	242.759	84.125	517.918
47.1723	-2.73952	47.1351	19.2498	47.1445	170.757	47.1631	472.385		85.0625	45.7884	85.0625	94.1048	85.0625	242.786	85.125	517.92
48.1978	-8.94619	48.1598	14.5576	48.1694	183.706	48.1884	489.332		86.0625	46.4707	86.0625	94.3582	86.0625	242.81	86.125	517.922
49.2233	-1.54275	49.1845	21.7874	49.1942	197.361	49.2137	473.178		87.0625	47.135	87.0625	94.5935	87.0625	242.83	87.125	517.923
50.2488	-1.5268	50.2091	26.2947	50.2191	229.492	50.239	472.07		88.0625	47.7819	88.0625	94.8118	88.0625	242.847	88.125	517.924
51.2743	0.16758	51.2338	35.4739	51.244	233.578	51.2642	475.073		89.0625	48.4117	89.0625	95.0144	89.0625	242.862	89.125	517.925
52.2998	-15.5113	52.2585	32.7025	52.2689	232.329	52.2895	480.798		90.0625	49.0251	90.0625	95.2024	90.0625	242.874	90.125	517.926
53.3252	-2.02407	53.2832	39.5329	53.2938	231.984	53.3148	477.344		91.0625	49.6223	91.0625	95.377	91.0625	242.885	91.125	517.926
54.3507	-0.3468	54.3079	48.7177	54.3186	246.847	54.3401	484.334		92.0625	50.2038	92.0625	95.539	92.0625	242.894	92.125	517.927
55.3762	-9.06508	55.3325	55.2796	55.3435	233.02	55.3654	500.373		93.0625	50.77	93.0625	95.6893	93.0625	242.901	93.125	517.927
56.4017	-11.6437	56.3572	54.953	56.3684	242.344	56.3907	498.748		94.0625	51.3214	94.0625	95.8288	94.0625	242.908	94.125	517.927
57.4272	-0.63334	57.3819	72.3589	57.3933	245.261	57.416	512.991		95.0625	51.8583	95.0625	95.9583	95.0625	242.914	95.125	517.928
58.4527	-2.86908	58.4066	64.1094	58.4182	240.268	58.4412	524.536		96.0625	52.3811	96.0625	96.0785	96.0625	242.918	96.125	517.928
59.4782	7.77472	59.4312	82.0915	59.4431	238.765	59.4665	504.923		97.0625	52.8901	97.0625	96.19	97.0625	242.922	97.125	517.928
60.5036	7.03153	60.4559	92.1446	60.4679	250.88	60.4918	511.444		98.0625	53.3858	98.0625	96.2936	98.0625	242.926	98.125	517.928
61.5291	13.5477	61.4806	82.6238	61.4928	233.436	61.5171	523.57		99.0625	53.8684	99.0625	96.3897	99.0625	242.929	99.125	517.928
62.5546	19.7762	62.5053	87.8396	62.5177	234.662	62.5424	512.537		100.063	54.3384	100.063	96.4788	100.063	242.931	100.125	517.928
63.5801	28.2478	63.5299	99.0918	63.5426	235.986	63.5677	516.046		101.063	54.796	101.063	96.5616	101.063	242.933	101.125	517.928
64.6056	31.8582	64.5546	99.7622	64.5675	229.108	64.5929	525.698		102.063	55.2416	102.063	96.6384	102.063	242.935	102.125	517.928
65.6311	20.9715	65.5793	84.8379	65.5923	231.83	65.6182	513.497		103.063	55.6755	103.063	96.7097	103.063	242.937	103.125	517.928
66.6565	29.7635	66.604	94.6879	66.6172	237.58	66.6435	529.717		104.063	56.098	104.063	96.7759	104.063	242.938	104.125	517.928
67.682	32.5541	67.6286	99.5505	67.6421	238.928	67.6688	533.852		105.063	56.5094	105.063	96.8373	105.063	242.939	105.125	517.928
68.7075	28.9473	68.6533	97.2839	68.667	239.812	68.6941	518.656		106.063	56.91	106.063	96.8943	106.063	242.94	106.125	517.928
69.733	20.2934	69.678	96.5028	69.6919	247.139	69.7194	519.84		107.063	57.3001	107.063	96.9472	107.063	242.941	107.125	517.928
70.7585	31.0929	70.7027	108.117	70.7167	258.076	70.7446	526.219		108.063	57.6799	108.063	96.9963	108.063	242.942	108.125	517.928
71.784	27.2688	71.7274	101.83	71.7416	246.013	71.7699	522.621		109.063	58.0497	109.063	97.0418	109.063	242.942	109.125	517.928
72.8095	25.1178	72.752	110.276	72.7665	246.819	72.7952	516.433		110.063	58.4099	110.063	97.0841	110.063	242.943	110.125	517.928
73.835	34.9522	73.7767	111.002	73.7914	248.46	73.8205	526.83		111.063	58.7605	111.063	97.1234	111.063	242.943	111.125	517.928
74.8604	28.5364	74.8014	107.874	74.8163	245.984	74.8458	522.014		112.063	59.102	112.063	97.1598	112.063	242.944	112.125	517.928
75.8859	26.319	75.826	99.7917	75.8411	235.311	75.8711	522.105		113.063	59.4344	113.063	97.1936	113.063	242.944	113.125	517.928
76.9114	33.7631	76.8507	97.397	76.866	235.463	76.8964	529.107		114.063	59.7582	114.063	97.225	114.063	242.944	114.125	517.928
77.9369	35.5923	77.8754	105.274	77.8909	233.919	77.9216	530.871		115.063	60.0734	115.063	97.2541	115.063	242.944	115.125	517.928
78.9624	25.6423	78.9001	89.9364	78.9158	233.245	78.9469	516.637		116.063	60.3804	116.063	97.2811	116.063	242.945	116.125	517.928
79.9879	36.0074	79.9248	82.9086	79.9407	230.383	79.9722	519.836		117.063	60.6793	117.063	97.3062	117.063	242.945	117.125	517.928
81.0134	36.1409	80.9494	92.2038	80.9655	239.729	80.9975	519.379		118.063	60.9703	118.063	97.3295	118.063	242.945	118.125	517.928
82.0388	35.651	81.9741	95.5352	81.9904	230.535	82.0228	517.685		119.063	61.2537	119.063	97.3511	119.063	242.945	119.125	517.928
83.0643	39.5075	82.9988	82.7841	83.0153	230.306	83.0481	517.136		120.063	61.5297	120.063	97.3711	120.063	242.945	120.125	517.928
84.0898	48.2432	84.0235	95.8753	84.0402	246.146	84.0734	519.823		121.063	61.7984	121.063	97.3897	121.063	242.945	121.125	517.928
85.1153	39.4367	85.0481	89.9283	85.0651	236.699	85.0986	507.227		122.063	62.06	122.063	97.407	122.063	242.945	122.125	517.928
86.1408	46.6279	86.0728	91.5158	86.0899	227.75	86.1239	530.116		123.063	62.3148	123.063	97.423	123.063	242.945	123.125	517.928
87.1663	49.364	87.0975	95.1105	87.1148	245.023	87.1492	529.438		124.063	62.5628	124.063	97.4379	124.063	242.945	124.125	517.928
88.1917	46.5639	88.1222	93.2331	88.1397	244.742	88.1745	516.28		125.063	62.8044	125.063	97.4517	125.063	242.946	125.125	517.928
89.2172	48.5559	89.1468	89.8816	89.1646	233.21	89.1998	518.801		126.063	63.0396	126.063	97.4645	126.063	242.946	126.125	517.928
90.2427	54.1656	90.1715	84.7238	90.1895	250.1	90.2251	527.27		127.063	63.2686	127.063	97.4764	127.063	242.946	127.125	517.928
91.2682	47.949	91.1962	103.436	91.2143	249.788	91.2503	522.32		128.063	63.4916	128.063	97.4875	128.063	242.946	128.125	517.928
92.2937	55.089	92.2209	85.3251	92.2392	245.774	92.2756	527.035		129.063	63.7088	129.063	97.4977	129.063	242.946	129.125	517.928
93.3192	67.8695	93.2455	91.547	93.2641	253.76	93.3009	518.275		130.063	63.9202	130.063	97.5072	130.063	242.946	130.125	517.928
94.3447	62.5297	94.2702	100.553	94.289	265.589	94.3262	528.607		131.063	64.1261	131.063	97.5161	131.063	242.946	131.125	517.928
95.3701	60.8357	95.2949	89.9364	95.3139	245.084	95.3515	533.062		132.063	64.3266	132.063	97.5243	132.063	242.946	132.125	517.928
96.3956	75.7137	96.3196	96.372	96.3387	261.479	96.3768	543.056		133.063	64.5218	133.063	97.5319	133.063	242.946	133.125	517.928
97.4211	72.1083	97.3443	104.757	97.3636	262.333	97.4021	529.83		134.063	64.7119	134.063	97.5389	134.063	242.946	134.125	517.928
98.4466	69.8637	98.3689	91.4817	98.3885	255.563	98.4273	540.238		135.063	64.897	135.063	97.5455	135.063	242.946	135.125	517.928
99.4721	76.1433	99.3936	94.1353	99.4134	257.071	99.4526	538.547		136.063	65.0773	136.063	97.5515	136.063	242.946	136.125	517.928
100.498	65.4359	100.418	100.977	100.438	260.412	100.478	535.58		137.063	65.2528	137.063	97.5572	137.063	242.946	137.125	517.928
101.523	65.5312	101.443	91.9525	101.463	250.944	101.503	534.469		138.063	65.4237	138.063	97.5624	138.063	242.946	138.125	517.928
102.549	77.0786	102.468	91.0389	102.488	263.199	102.528	536.265		139.063	65.5901	139.063	97.5673	139.063	242.946	139.125	517.928
103.574	71.4724	103.492	89.1048	103.513	263.238	103.554	520.06		140.063	65.7521	140.063	97.5718	140.063	242.946	140.125	517.928
104.6	60.0839	104.517	84.4274	104.538	244.016	104.579	538.944		141.063	65.9099	141.063	97.576	141.063	242.946	141.125	517.928
105.625	74.5233	105.542	85.1423	105.563	255.415	105.604	533.857		142.063	66.0635	142.063	97.5799	142.063	242.946	142.125	517.928
106.65	76.0749	106.566	89.4753	106.588	269.278	106.63	530.806		143.063	66.2131	143.063	97.5835	143.063	242.946	143.125	517.928
107.676	80.1139	107.591	80.983	107.612	245.725	107.655	529.273		144.063	66.3587	144.063	97.5868	144.063	242.946	144.125	517.928
108.701	71.3802	108.616	85.0539	108.637	238.906	108.68	535.013		145.063	66.5006	145.063	97.5899	145.063	242.946	145.125	517.928
109.727	80.8281	109.64	94.8757	109.662	255.342	109.705	519.349		146.063	66.6387	146.063	97.5928	146.063	242.946	146.125	517.928
110.752	70.7214	110.665	98.9562	110.687	244.049	110.731	528.233		146.313	66.6726	146.313	97.5935	146.313	242.946	146.438	517.928
111.778	84.6887	111.69	93.7273	111.712	234.667	111.756	513.851
112.803	74.8583	112.714	104.864	112.737	243.239	112.781	505.596		150.313	30.2167	150.313	109.009	150.313	234.184	150.438	508.982
113.829	63.1809	113.739	104.263	113.762	228.921	113.807	504.763		151.313	24.113	151.313	91.3861	151.375	187.037	151.438	442.146
114.854	61.0604	114.764	109.44	114.787	234.153	114.832	515.782		152.313	19.2423	152.313	76.6118	152.375	151.371	152.438	384.086
115.88	75.3064	115.788	99.3069	115.811	244.838	115.857	494.784		153.313	15.3554	153.313	64.2261	153.375	122.505	153.438	333.651
116.905	54.1565	116.813	104.386	116.836	230.661	116.882	500.456		154.313	12.2537	154.313	53.8428	154.375	99.1447	154.438	289.838
117.931	59.4128	117.838	98.6857	117.861	226.118	117.908	514.164		155.313	9.77848	155.313	45.1381	155.375	80.2386	155.438	251.778
118.956	53.5696	118.862	98.0554	118.886	240.136	118.933	503.422		156.313	7.80327	156.313	37.8407	156.375	64.9378	156.438	218.716
119.982	61.7723	119.887	99.7179	119.911	235.212	119.958	501.143		157.313	6.22704	157.313	31.7231	157.375	52.5547	157.438	189.996
121.007	56.9609	120.912	87.5933	120.936	232.704	120.984	510.307		158.313	4.9692	158.313	26.5944	158.375	42.5329	158.438	165.047
122.033	66.8254	121.936	98.6855	121.961	232.811	122.009	503.669		159.313	3.96544	159.313	22.295	159.375	34.4222	159.438	143.374
123.058	55.6145	122.961	99.0778	122.986	229.953	123.034	502.838		160.313	3.16444	160.375	18.4857	160.375	27.8582	160.438	124.547
124.084	57.1508	123.986	89.5846	124.011	238.39	124.059	513.352		161.313	2.52523	161.375	15.4972	161.375	22.5459	161.438	108.192
125.109	67.2974	125.011	88.8802	125.035	242.466	125.085	502.015		162.313	2.01515	162.375	12.9918	162.375	18.2466	162.438	93.9854
126.135	57.4192	126.035	100.63	126.06	243.099	126.11	509.524		163.313	1.60809	163.375	10.8914	163.375	14.7671	163.438	81.6438
127.16	51.784	127.06	81.7168	127.085	230.088	127.135	518.65		164.313	1.28327	164.375	9.1306	164.375	11.9511	164.5	70.3016
128.186	54.6351	128.085	85.0503	128.11	255.661	128.161	523.586		165.313	1.02405	165.375	7.65447	165.375	9.67215	165.5	61.0701
129.211	52.1855	129.109	79.4065	129.135	247.462	129.186	500.806		166.313	0.8172	166.375	6.41698	166.375	7.82775	166.5	53.0508
130.237	49.486	130.134	86.9638	130.16	236.983	130.211	518.334		167.313	0.65213	167.375	5.37956	167.375	6.33506	167.5	46.0845
131.262	53.166	131.159	73.4554	131.185	241.536	131.236	521.157		168.313	0.5204	168.375	4.50986	168.375	5.12702	168.5	40.033
132.288	55.4076	132.183	81.7405	132.21	241.846	132.262	504.625		169.313	0.41528	169.375	3.78075	169.375	4.14934	169.5	34.7761
133.313	50.6116	133.208	89.3097	133.234	223.8	133.287	497.008		170.313	0.3314	170.375	3.16953	170.375	3.35809	170.5	30.2096
134.339	51.495	134.233	89.4227	134.259	234.212	134.312	512.029		171.313	0.26446	171.375	2.65711	171.375	2.71773	171.5	26.2426
135.364	67.9919	135.257	91.7271	135.284	231.676	135.338	496.574		172.375	0.20808	172.375	2.22754	172.375	2.19948	172.5	22.7966
136.39	46.1701	136.282	111.839	136.309	224.39	136.363	515.394		173.375	0.16605	173.375	1.86742	173.375	1.78006	173.5	19.8031
137.415	55.4404	137.307	101.785	137.334	221.727	137.388	509.55		174.375	0.13251	174.375	1.56552	174.438	1.42169	174.5	17.2027
138.441	49.724	138.331	112.499	138.359	238.409	138.413	510.013		175.375	0.10574	175.375	1.31242	175.438	1.15059	175.5	14.9438
139.466	52.6008	139.356	114.559	139.384	227.913	139.439	513.23		176.375	0.08438	176.375	1.10024	176.438	0.93118	176.5	12.9814
140.492	48.5436	140.381	113.742	140.409	234.742	140.464	531.917		177.375	0.06734	177.375	0.92237	177.438	0.75361	177.5	11.2768
141.517	54.0344	141.405	103.102	141.433	227.685	141.489	503.735		178.375	0.05374	178.375	0.77325	178.438	0.6099	178.5	9.79601
142.542	49.7215	142.43	105.19	142.458	224.155	142.515	507.1		179.375	0.04288	179.375	0.64824	179.438	0.4936	179.5	8.50967
143.568	57.7757	143.455	101.641	143.483	233.947	143.54	504.976		180.375	0.03422	180.375	0.54344	180.438	0.39948	180.5	7.39223
144.593	68.4848	144.479	90.5716	144.508	235.85	144.565	492.908		181.375	0.02731	181.375	0.45558	181.438	0.3233	181.5	6.42153
145.619	62.3865	145.504	88.8112	145.533	218.824	145.59	499.654		182.375	0.02179	182.375	0.38193	182.438	0.26165	182.5	5.5783
146.644	60.3659	146.529	91.4597	146.558	232.201	146.616	506.711		183.375	0.01739	183.375	0.32018	183.438	0.21175	183.5	4.8458
147.67	66.8025	147.553	91.9905	147.583	240.093	147.641	489.732		184.375	0.01388	184.375	0.26842	184.438	0.17137	184.5	4.20948
148.695	58.444	148.578	100.661	148.608	250.287	148.666	515.854		185.375	0.01107	185.375	0.22503	185.438	0.1387	185.5	3.65672
149.721	57.3586	149.603	96.6949	149.633	240.825	149.692	524.731		186.375	0.00884	186.375	0.18865	186.438	0.11225	186.563	3.14872
150.746	30.8487	150.627	102.292	150.657	235.602	150.717	520.737		187.375	0.00705	187.375	0.15815	187.438	0.09084	187.563	2.73525
151.772	44.7728	151.652	113.458	151.682	232.622	151.742	485.926		188.375	0.00563	188.375	0.13258	188.438	0.07352	188.563	2.37607
152.797	32.4217	152.677	108.207	152.707	225.688	152.767	482.935		189.375	0.00449	189.375	0.11115	189.438	0.0595	189.563	2.06406
153.823	20.9911	153.701	86.6212	153.732	190.2	153.793	444.604		190.375	0.00358	190.375	0.09318	190.438	0.04815	190.563	1.79302
154.848	20.3116	154.726	87.4549	154.757	147.733	154.818	379.652		191.375	0.00286	191.375	0.07811	191.438	0.03897	191.563	1.55758
155.874	19.6051	155.751	75.846	155.782	129.298	155.843	326.678		192.375	0.00228	192.375	0.06549	192.438	0.03154	192.563	1.35305
156.899	20.3296	156.775	53.7627	156.807	95.7488	156.869	254.56		193.438	0.0018	193.375	0.0549	193.438	0.02553	193.563	1.17537
157.925	13.9187	157.8	35.903	157.832	58.0298	157.894	213.52		194.438	0.00143	194.375	0.04602	194.438	0.02066	194.563	1.02103
158.95	4.09456	158.825	22.9278	158.856	31.4007	158.919	153.862		195.438	0.00114	195.375	0.03858	195.438	0.01672	195.563	0.88696
159.976	12.3561	159.85	18.3305	159.881	14.2495	159.944	109.475		196.438	0.000912489	196.375	0.03234	196.438	0.01353	196.563	0.77049
161.001	-0.24253	160.874	14.2535	160.906	10.3773	160.97	92.1009		197.438	0.00072817	197.438	0.02682	197.438	0.01095	197.563	0.66931
162.027	-9.94511	161.899	1.69356	161.931	6.40045	161.995	76.9116		198.438	0.000581082	198.438	0.02248	198.438	0.00886	198.563	0.58142
163.052	-2.78967	162.924	5.15126	162.956	-2.12913	163.02	70.9398		199.438	0.000463706	199.438	0.01885	199.438	0.00717	199.563	0.50507
164.078	-19.4937	163.948	9.30023	163.981	9.72413	164.046	71.2599		200.438	0.000370039	200.438	0.0158	200.438	0.0058	200.563	0.43875
165.103	-11.6895	164.973	6.20294	165.006	3.66994	165.071	70.9715		201.438	0.000295293	201.438	0.01325	201.438	0.0047	201.563	0.38114
166.129	-12.7242	165.998	3.75743	166.031	6.29956	166.096	68.5888		202.438	0.000235645	202.438	0.0111	202.438	0.0038	202.563	0.33109
167.154	-14.1812	167.022	2.05982	167.055	3.75244	167.121	76.5132		203.438	0.000188045	203.438	0.00931	203.5	0.00304	203.563	0.28761
168.18	-8.60529	168.047	-0.38752	168.08	-6.93198	168.147	58.3248		204.438	0.000150061	204.438	0.0078	204.5	0.00246	204.563	0.24985
169.205	-2.96879	169.072	-1.83194	169.105	-16.2811	169.172	56.8474		205.438	0.000119749	205.438	0.00654	205.5	0.00199	205.563	0.21704
170.231	-13.7021	170.096	-6.91831	170.13	-17.155	170.197	54.8838		206.438	9.55604e-05	206.438	0.00549	206.5	0.00161	206.563	0.18854
171.256	1.46892	171.121	2.88504	171.155	-25.0009	171.223	44.3781		207.438	7.62576e-05	207.438	0.0046	207.5	0.0013	207.563	0.16378
172.282	-5.20178	172.146	-6.01194	172.18	-29.5663	172.248	44.2859		208.438	6.08538e-05	208.438	0.00385	208.5	0.00105	208.563	0.14227
173.307	-10.7703	173.17	-5.83522	173.205	-21.7821	173.273	48.5862		209.438	4.85616e-05	209.438	0.00323	209.5	0.000853201	209.563	0.12359
174.333	-11.7765	174.195	6.00482	174.23	-32.4541	174.298	38.7315		210.438	3.87523e-05	210.438	0.00271	210.5	0.000690503	210.563	0.10736
175.358	-13.3689	175.22	7.55835	175.255	-17.1028	175.324	50.5249		211.438	3.09245e-05	211.438	0.00227	211.5	0.00055883	211.563	0.09326
176.383	-16.9743	176.244	-12.6251	176.279	-11.5943	176.349	48.7887		212.438	2.46779e-05	212.438	0.0019	212.5	0.000452265	212.563	0.08102
177.409	-12.6493	177.269	1.96464	177.304	-22.9788	177.374	36.6519		213.438	1.9693e-05	213.438	0.0016	213.5	0.000366022	213.563	0.07038
178.434	-27.812	178.294	-2.33864	178.329	-12.7356	178.4	39.6224		214.438	1.57151e-05	214.438	0.00134	214.5	0.000296225	214.563	0.06114
179.46	-20.7733	179.318	-10.8158	179.354	-16.998	179.425	38.7131		215.438	1.25407e-05	215.438	0.00112	215.5	0.000239737	215.563	0.05311
180.485	-12.0141	180.343	-14.6878	180.379	-19.032	180.45	17.834		216.438	1.00076e-05	216.438	0.000940451	216.5	0.000194021	216.563	0.04613
181.511	-18.8254	181.368	-10.3579	181.404	-22.5997	181.475	24.3962		217.438	7.98607e-06	217.438	0.00078841	217.5	0.000157023	217.563	0.04008
182.536	-20.0126	182.392	-13.6143	182.429	-27.8717	182.501	17.7728		218.438	6.37291e-06	218.438	0.000660949	218.5	0.00012708	218.563	0.03481
183.562	-13.24	183.417	-8.88645	183.454	-31.3214	183.526	10.7075		219.438	5.08561e-06	219.438	0.000554094	219.5	0.000102847	219.563	0.03024
184.587	-13.732	184.442	-9.7691	184.478	-24.09	184.551	8.6812		220.438	4.05834e-06	220.438	0.000464515	220.5	8.32348e-05	220.563	0.02627
185.613	-2.96866	185.466	-14.2481	185.503	-32.4941	185.577	19.6276		221.438	3.23857e-06	221.438	0.000389417	221.5	6.73626e-05	221.563	0.02282
186.638	-13.7268	186.491	4.62818	186.528	-35.4145	186.602	1.6333		222.438	2.58439e-06	222.438	0.000326461	222.5	5.45171e-05	222.563	0.01982
187.664	-6.61553	187.516	-12.4281	187.553	-23.8111	187.627	8.69427		223.5	2.03347e-06	223.438	0.000273682	223.5	4.41212e-05	223.563	0.01722
188.689	-5.85525	188.54	-10.3192	188.578	-36.098	188.652	9.2141		224.5	1.62272e-06	224.438	0.000229437	224.5	3.57076e-05	224.625	0.01483
189.715	-1.96741	189.565	-3.40321	189.603	-35.2027	189.678	0.46775		225.5	1.29494e-06	225.438	0.000192344	225.5	2.88985e-05	225.625	0.01288
190.74	-0.53608	190.59	-5.2735	190.628	-32.52	190.703	1.75922		226.5	1.03336e-06	226.438	0.000161248	226.5	2.33878e-05	226.625	0.01119
191.766	-9.18198	191.614	-11.375	191.653	-37.0783	191.728	3.17564		227.5	8.24629e-07	227.438	0.000135179	227.5	1.89279e-05	227.625	0.00972
192.791	-2.85635	192.639	-4.52252	192.677	-43.4871	192.754	-5.70847		228.5	6.58057e-07	228.438	0.000113325	228.5	1.53185e-05	228.625	0.00844
193.817	1.50219	193.664	-3.38584	193.702	-36.6955	193.779	8.96531		229.5	5.25132e-07	229.438	9.5004e-05	229.5	1.23974e-05	229.625	0.00734
194.842	-7.98424	194.689	1.06543	194.727	-36.1975	194.804	-5.09029		230.5	4.19057e-07	230.438	7.96449e-05	230.5	1.00333e-05	230.625	0.00637
195.868	-1.39497	195.713	-0.47422	195.752	-39.3916	195.829	3.67287		231.5	3.34409e-07	231.438	6.67688e-05	231.5	8.12005e-06	231.625	0.00554
196.893	-5.91901	196.738	-3.5052	196.777	-33.4485	196.855	5.46594		232.5	2.6686e-07	232.438	5.59744e-05	232.5	6.57162e-06	232.625	0.00481
197.919	-4.08677	197.763	1.63601	197.802	-30.4371	197.88	2.33431		233.5	2.12955e-07	233.438	4.69251e-05	233.5	5.31847e-06	233.625	0.00418
198.944	-3.93362	198.787	5.5694	198.827	-33.8231	198.905	-5.72758		234.5	1.69939e-07	234.438	3.93388e-05	234.5	4.30428e-06	234.625	0.00363
199.97	-2.74481	199.812	-8.50792	199.852	-22.4	199.931	8.22139		235.5	1.35612e-07	235.438	3.2979e-05	235.563	3.43773e-06	235.625	0.00315
200.995	-6.57573	200.837	0.87717	200.877	-32.4361	200.956	4.44769		236.5	1.08219e-07	236.5	2.73443e-05	236.563	2.78218e-06	236.625	0.00274
202.021	-0.79943	201.861	5.54587	201.901	-28.0991	201.981	1.11238		237.5	8.63592e-08	237.5	2.29236e-05	237.563	2.25164e-06	237.625	0.00238
203.046	-5.23382	202.886	0.83481	202.926	-26.1074	203.006	12.2636		238.5	6.8915e-08	238.5	1.92175e-05	238.563	1.82227e-06	238.625	0.00207
204.072	-6.73457	203.911	7.74782	203.951	-25.3316	204.032	17.6465		239.5	5.49944e-08	239.5	1.61107e-05	239.563	1.47478e-06	239.625	0.00179
205.097	1.12969	204.935	22.1713	204.976	-25.8194	205.057	14.2717		240.5	4.38858e-08	240.5	1.35061e-05	240.563	1.19355e-06	240.625	0.00156
206.123	-5.45102	205.96	5.51009	206.001	-19.9559	206.082	30.9924		241.5	3.5021e-08	241.5	1.13226e-05	241.563	9.65951e-07	241.625	0.00135
207.148	-12.0997	206.985	25.7621	207.026	-21.7358	207.108	21.6191		242.5	2.79469e-08	242.5	9.49208e-06	242.563	7.81752e-07	242.625	0.00118
208.174	-2.86079	208.009	29.0112	208.051	-15.8264	208.133	10.6963		243.5	2.23017e-08	243.5	7.95751e-06	243.563	6.32679e-07	243.625	0.00102
209.199	-6.78346	209.034	11.8119	209.076	-9.61091	209.158	19.5504		244.5	1.77969e-08	244.5	6.67103e-06	244.563	5.12032e-07	244.625	0.000887921
210.225	-12.326	210.059	17.1259	210.1	-17.9666	210.183	15.9034		245.5	1.4202e-08	245.5	5.59253e-06	245.563	4.14392e-07	245.625	0.000771325
211.25	-9.83185	211.083	28.4863	211.125	-19.5282	211.209	-8.6807		246.5	1.13332e-08	246.5	4.6884e-06	246.563	3.35371e-07	246.688	0.000664171
212.275	-8.44576	212.108	6.61934	212.15	-10.9343	212.234	-2.19054		247.5	9.04396e-09	247.5	3.93043e-06	247.563	2.71418e-07	247.688	0.000576956
213.301	-10.7241	213.133	10.9109	213.175	-22.4756	213.259	-2.44376		248.5	7.21712e-09	248.5	3.29501e-06	248.563	2.19661e-07	248.688	0.000501194
214.326	-2.85736	214.157	12.1178	214.2	-28.7419	214.285	-3.7228		249.563	5.67864e-09	249.5	2.76231e-06	249.563	1.77773e-07	249.688	0.000435381
215.352	-6.70287	215.182	10.3286	215.225	-25.0085	215.31	5.94111		250.563	4.53157e-09	250.5	2.31573e-06	250.563	1.43874e-07	250.688	0.000378209
216.377	-3.92701	216.207	6.61705	216.25	-30.0275	216.335	1.33104		251.563	3.61621e-09	251.5	1.94135e-06	251.563	1.16438e-07	251.688	0.000328545
217.403	10.6644	217.231	13.4854	217.275	-36.4595	217.36	6.64131		252.563	2.88575e-09	252.5	1.62749e-06	252.563	9.42343e-08	252.688	0.000285403
218.428	-0.60677	218.256	3.5403	218.299	-27.0034	218.386	18.0188
219.454	5.38338	219.281	13.1975	219.324	-35.3059	219.411	22.0201
220.479	14.9548	220.305	15.6979	220.349	-39.3257	220.436	3.3407
221.505	3.55855	221.33	8.84987	221.374	-29.8518	221.462	8.68723
222.53	7.88355	222.355	12.5216	222.399	-34.4265	222.487	16.0857
223.556	6.17878	223.379	24.9935	223.424	-36.7342	223.512	1.7963
224.581	-2.37364	224.404	8.9589	224.449	-38.8658	224.537	4.35714
225.607	2.39885	225.429	23.0484	225.474	-31.2146	225.563	4.45707
226.632	-1.29073	226.453	23.2359	226.499	-28.5886	226.588	4.50043
227.658	-11.1723	227.478	10.6563	227.523	-28.0107	227.613	7.25919
228.683	-9.02633	228.503	15.618	228.548	-24.8018	228.639	10.8531
229.709	-3.90013	229.528	25.312	229.573	-17.0267	229.664	1.2336
230.734	-7.3181	230.552	1.05199	230.598	-8.56493	230.689	5.04743
231.76	-14.4664	231.577	13.3249	231.623	-9.46924	231.714	7.08941
232.785	-6.04316	232.602	13.9364	232.648	-18.0877	232.74	-0.54964
233.811	-7.15807	233.626	8.65774	233.673	-2.29436	233.765	-2.14277
234.836	-7.37349	234.651	8.02793	234.698	-8.85271	234.79	12.7861
235.862	-4.95069	235.676	21.3958	235.722	-17.3514	235.815	-1.42396
236.887	-10.8663	236.7	9.03044	236.747	-16.304	236.841	6.73368
237.913	-10.9773	237.725	14.7927	237.772	-4.33585	237.866	22.124
238.938	-3.18621	238.75	22.3759	238.797	-19.0016	238.891	10.2405
239.964	-10.7395	239.774	11.2322	239.822	-5.20772	239.917	11.5633
240.989	-14.1691	240.799	17.8642	240.847	-3.21385	240.942	21.0819
242.015	-12.6055	241.824	19.277	241.872	2.94525	241.967	6.55584
243.04	-12.0953	242.848	10.7607	242.897	1.39428	242.993	11.0304
244.066	-18.8334	243.873	16.658	243.922	10.3636	244.018	7.20812
245.091	-11.7546	244.898	16.5338	244.946	6.0587	245.043	0.17273
246.117	-21.3101	245.922	15.0381	245.971	9.01304	246.068	2.84421
247.142	-24.1039	246.947	4.02154	246.996	5.08797	247.094	6.06934
248.167	-20.8584	247.972	13.2832	248.021	2.39606	248.119	-4.71052
249.193	-12.8725	248.996	3.71185	249.046	0.44784	249.144	2.41043
250.218	-30.5712	250.021	1.76726	250.071	12.3776	250.169	1.84969
251.244	-16.397	251.046	-1.57545	251.096	-2.76105	251.195	-6.97101
252.269	-20.4935	252.07	-8.57748	252.121	5.07814	252.22	-9.18681
253.295	-11.7969	253.095	-4.37361	253.145	10.9962	253.245	3.37036
254.32	-9.2951	254.12	0.43223	254.17	14.4654	254.271	-14.8388
255.346	-2.04925	255.144	-9.86119	255.195	8.65436	255.296	-11.3402
256.371	-12.6071	256.169	-5.27539	256.22	-0.48179	256.321	-0.72612
257.397	6.11461	257.194	0.55964	257.245	12.5613	257.346	1.36921
258.422	12.1463	258.218	2.4385	258.27	3.40107	258.372	-4.97787
259.448	3.68381	259.243	-3.83173	259.295	-9.40188	259.397	-1.97936
260.473	-0.43439	260.268	-2.84804	260.32	-8.18529	260.422	9.87202
261.499	7.43183	261.292	2.36026	261.344	-7.11901	261.448	7.38964
262.524	15.6346	262.317	-1.3764	262.369	-8.4816	262.473	-11.025
263.55	-7.11497	263.342	-9.13867	263.394	-11.8197	263.498	1.27688
264.575	5.05307	264.366	3.76941	264.419	0.42189	264.523	0.5461
265.601	-3.42514	265.391	-7.49779	265.444	-15.3765	265.549	-11.4039
266.626	-0.98639	266.416	-8.3643	266.469	2.26144	266.574	-8.57056
267.652	-1.76666	267.441	-2.1332	267.494	-2.04341	267.599	-2.7652
268.677	-1.1094	268.465	-5.72112	268.519	-12.495	268.625	-10.7445
269.703	-8.82287	269.49	-17.441	269.544	-14.5725	269.65	-1.97635
270.728	2.15067	270.515	-3.5398	270.568	-9.49393	270.675	6.83182
271.754	-1.51591	271.539	-12.0094	271.593	-26.6657	271.7	-2.50382
272.779	2.98226	272.564	-18.118	272.618	-18.5688	272.726	-3.11714
273.805	-4.84647	273.589	-12.0521	273.643	-22.0141	273.751	17.5767
274.83	11.6314	274.613	-6.10115	274.668	-21.9301	274.776	1.72524
275.856	-10.1652	275.638	-17.1366	275.693	-20.1381	275.802	6.71231
276.881	8.81695	276.663	-11.327	276.718	-1.70743	276.827	10.4219
277.907	4.28851	277.687	-7.69125	277.743	-16.738	277.852	4.73838
278.932	-2.30983	278.712	-5.31328	278.767	-2.97681	278.877	9.77023
279.958	-4.48834	279.737	-14.6092	279.792	-3.83802	279.903	24.5445
280.983	10.0693	280.761	0.14184	280.817	-5.61824	280.928	1.99626
282.009	-4.11236	281.786	-16.9354	281.842	-7.07969	281.953	11.5448
283.034	7.28305	282.811	-4.31615	282.867	-5.19768	282.979	25.9629
284.059	-4.41768	283.835	-4.46774	283.892	-12.8351	284.004	24.4036
285.085	3.35997	284.86	-10.8953	284.917	-8.40072	285.029	13.2393
286.11	2.65238	285.885	-16.3694	285.942	-4.41121	286.054	24.2647
287.136	5.01204	286.909	-1.64264	286.966	-6.09551	287.08	29.8527
288.161	-13.842	287.934	-18.3734	287.991	-0.3002	288.105	22.8334
289.187	-0.3821	288.959	-10.9903	289.016	1.59821	289.13	30.3188
290.212	-1.72331	289.983	-16.8656	290.041	2.11084	290.156	27.7503
291.238	-12.6071	291.008	-19.1229	291.066	3.24755	291.181	18.3087
292.263	-13.3382	292.033	-21.0106	292.091	4.94168	292.206	29.1152
293.289	-1.50262	293.057	-10.1299	293.116	-1.46754	293.231	39.4648
294.314	-12.9261	294.082	-24.0294	294.141	-5.48658	294.257	18.1463
295.34	-7.59295	295.107	-17.4419	295.166	0.29727	295.282	28.6982
296.365	-6.91579	296.131	-19.2457	296.19	-0.85806	296.307	37.6669
297.391	-5.63859	297.156	-17.661	297.215	-10.0459	297.333	31.3424
298.416	-10.2677	298.181	-16.7839	298.24	5.23959	298.358	28.254
299.442	-7.51509	299.205	-17.9427	299.265	3.0827	299.383	38.3767
300.467	-14.0786	300.23	-26.6152	300.29	-4.99735	300.408	13.8518
301.493	-11.771	301.255	-20.1035	301.315	12.9788	301.434	30.6142
302.518	-12.6806	302.28	-5.88305	302.34	9.16641	302.459	18.8461
303.544	-17.2337	303.304	-15.4139	303.365	-5.35546	303.484	17.4219
304.569	-19.4546	304.329	-16.2961	304.389	13.0735	304.51	12.2457
305.595	-8.49021	305.354	1.2055	305.414	2.67647	305.535	20.9359
306.62	-16.2124	306.378	4.4928	306.439	4.59594	306.56	13.0902
307.646	-14.0743	307.403	-0.47589	307.464	4.55463	307.585	25.1463
308.671	-16.3622	308.428	3.00149	308.489	8.20516	308.611	29.4785
309.697	-13.6412	309.452	-0.05293	309.514	-6.97778	309.636	18.5855
310.722	-11.0631	310.477	-4.33349	310.539	22	310.661	23.7566
311.748	-10.1311	311.502	-0.16766	311.564	5.43946	311.687	30.2804
312.773	-20.2467	312.526	1.47018	312.588	-1.77412	312.712	31.9239
313.799	-10.0202	313.551	-16.7964	313.613	11.9499	313.737	12.2241
314.824	12.9237	314.576	6.74585	314.638	19.659	314.762	18.6362
315.85	2.79283	315.6	16.0993	315.663	10.1481	315.788	25.4064
316.875	-5.27054	316.625	8.09335	316.688	14.582	316.813	33.281
